# Supplementary material for: Impact of deoxygenation and warming on global marine species in the 21st century
Source: Copernicus journal article supplement (doi:10.5194/egusphere-2022-1364), 2022-12-19
Supplement: Supplementary file [file egusphere-2022-1364-AC1-supplement.pdf]

## Response to reviews on 'Impact of deoxygenation and warming on global marine species in the 21st century'

*We thank the editor and both reviewers for their critical assessment of our work and their very helpful and constructive comments. We have addressed all comments and revised our manuscript accordingly. In the following, we address the editor and reviewer's comments point by point. Our response is given in italic text below and changes to the text in the manuscript are shown in blue. We also attach the track-and-traced manuscript at the end of this response.*

*Yours sincerely,*

*Anne Morée, on behalf of the co-authors*

### Associate Editor initial decision:

This manuscript fits within the scope of the journal and meets its basic scientific quality. I builds upon the previous work of the authors and other published work in this field of research.

While this approach is useful to assess the "potential" change in habitat space based on the change in temperature and oxygen relative to the metabolic demands of the animals, in reality habitat space is also defined by the food resources, predation pressure and the adaption of the animals to the higher temperatures and lower dissolved oxygen. The authors should acknowledge this in their Discussion section.

*Thank you for noting this. We agree it is important to stress that there are many other factors of potential influence on species' habitats. The possibility of adaptation is mentioned in lines 420-421 and 427-428 but we now stress the 'potential' aspect by adding 'potential' to line 422: 'Further note that we considered potential loss of contemporary habitat only'. We decided to elaborate in lines 414-415 on other stressors to species' habitat space, which now reads: 'c) we do not include other potential stressors on species' habitats in our analysis such as acidification, changes in ecosystem structure, overfishing, marine phenology, disease pressure, food resources, predation pressure, pollution or eutrophication (e.g.; Poloczanska et al., 2016; Bindoff et al., 2019; Whalen et al., 2020).'*

## Response to Comments by 'Anonymous Referee #1'

### General comments

I find this research using AGI to evaluate the effect of long-term warming and deoxygenation on contemporary habitat useful. It uses the AGI an index that represents the o<sub>2</sub> supply to demand ratio for maintenance activity. It is handy as it requires few data somewhat easily accessible. The authors show how this index can be used to assess species vulnerability to environmental changes using only species-specific biogeographic data of 47 species. An interesting point, is that the authors show that tendencies and mean changes alone (warming, deoxygenation and mean changes in AGI) do not suffice to predict species vulnerability within their present habitat, but rather the quantity of habitat volume close to AGI<sub>crit</sub> as show by the CDF of the AGIs. They also show the high inter-species variability in terms habitat preferences and critical thresholds greatly influence the changes in viable habitat. Indeed the mean changes do not reflect species-specific changes in habitat viability. It is also very interesting to present the results by degrees of global warming.

*We thank the reviewer for the positive assessment of our manuscript.*

A few improvements could be made to facilitate the reading of the results (see specific comments):

- More systematic presentation of the results

*Please see our responses below*

- Some methods of calculation are not given

*Please see our responses below*

- A bit more clarity is needed regarding the definition of some terms or choice of wording (e.g. habitat viability, potential habitat, AGI<sub>rel</sub> vs.  $\Delta$ AGI...). I suggest they all be defined in the method section.

*We define/clarify habitat viability,  $\Delta$ AGI and AGI<sub>rel</sub> in Sect. 2.1 and check for their correct use throughout the manuscript. Regarding 'potential habitat' this was a writing error: Wherever the text read 'large potential habitat loss' it should have read 'potential large habitat loss' and we corrected this accordingly.*

- Questions regarding the AGI need to be discussed.

*See our responses below*

### Specific comments

In general, a more systematic presentation of results is need to ease the reading and further support the demonstration. In particular, a more systematic presentation of the figure (to facilitate the reading, so the reader doesn't have to go back and forth in the main text. Also more consistency when choosing the warming level, scenario, etc. when presenting the figure in the main text. If you start presenting results for the levels of warming (Fig. 3 and 4), please do so for the rest of the manuscript. Even with figures in the supplemental.

*With the current layout (global mean changes (Fig. 1 and Sect 3.1), local changes and drivers (Fig. 2 and Sect 3.2) to impacts (Fig. 3 and 4, Sect 3.3) and finally drivers of habitat loss (Fig. 5, Sect 3.4)), we aimed for a structured results section. We checked the manuscript for text with references to Figures much earlier in the text and reduced this such that back-and-forth reading is reduced (e.g., removed 'Fig. 1a' in line 288; removed '(black stars in Fig. 3)' on line 330). All figures in the appendix are plotted for certain degrees of global warming, so we are unsure which figures the reviewer is referring to.*

*The only part of the text where SSP scenarios are described instead of global warming levels is at the end of Section 3.1. We do so to stress that the pathway (i.e., scenario) very much matters for the*

*maximum potential impact we quantify: In essence, we describe that the blue lines in Fig. 1 stop before the red lines. We think it is valuable for the reader to be aware of this but clarify by replacing line 180/181 with 'Even though our results in Fig. 1 are presented at warming levels, we here highlight that the scenario determines the maximum changes in temperature, pO<sub>2</sub> and AGIrel (Fig. C2):' (see also our response to your comment on Line 180-191).*

*Abstract*

Line 17-20: not clear, please rephrase.

*We rephrase these two sentences to 'We find that the in-habitat spatiotemporal variability of O<sub>2</sub> and temperature (and hence AGI) provides a quantifiable measure of a species' vulnerability to change. In the event of potential large habitat losses (over 5%), species vulnerability is the most important indicator. Vulnerability is therefore more critical than changes in habitat viability, temperature or pO<sub>2</sub> levels.'*

*Methods and data*

The choice of keeping a constant value for j1 and j2 across all species is indeed convenient and confers great value to the AGI and has been somewhat evaluated in the Clarke et al 2021 per comparison to the metabolic index. However, I still believe that sensitivity analysis to j1 and j2 would be useful to demonstrate the added power of the AGI since this index is quite sensitive to parameters j1 and j2. Given the formula and the scale to which it is applied, I imagine AGIrel at global scale will be only weakly affected by the choice of j1 and j2. But for species species-specific AGI, it is less certain, in particular for species from equatorial and tropical areas. In particular, it will affect AGIcrit and so the changes in volume of viable habitat (AGI>AGIcrit) and possibly the slope of the CDF used to assess species vulnerability to changes in AGI, as you demonstrate that changes in viable habitat are species-dependant. So sensitivity analysis of AGIrel and various AGI would be useful to demonstrate the degree of independence of the AGI to these parameters and would add great value to the results.

*We evaluate the sensitivity of AGIrel to the constants j2 and j1 by varying both j2 and j1 ± 20% of their original values (i.e., j2=8000 ± 1600 K, j1=4500 ± 900 K). The j2-j1 difference is relevant for AGI and AGIrel (see equations 1 and 2) and is then at least 1000K (6400K-5400K) and at most 6000K (9600K-3600K). Note that the standard j2-j1 is 3500K (8000-4500K) and that j2-j1 is thus varied by +/- 71%.*

*We recreate Fig. 2 for a j2-j1=1000K and j2-j1=6000K:*

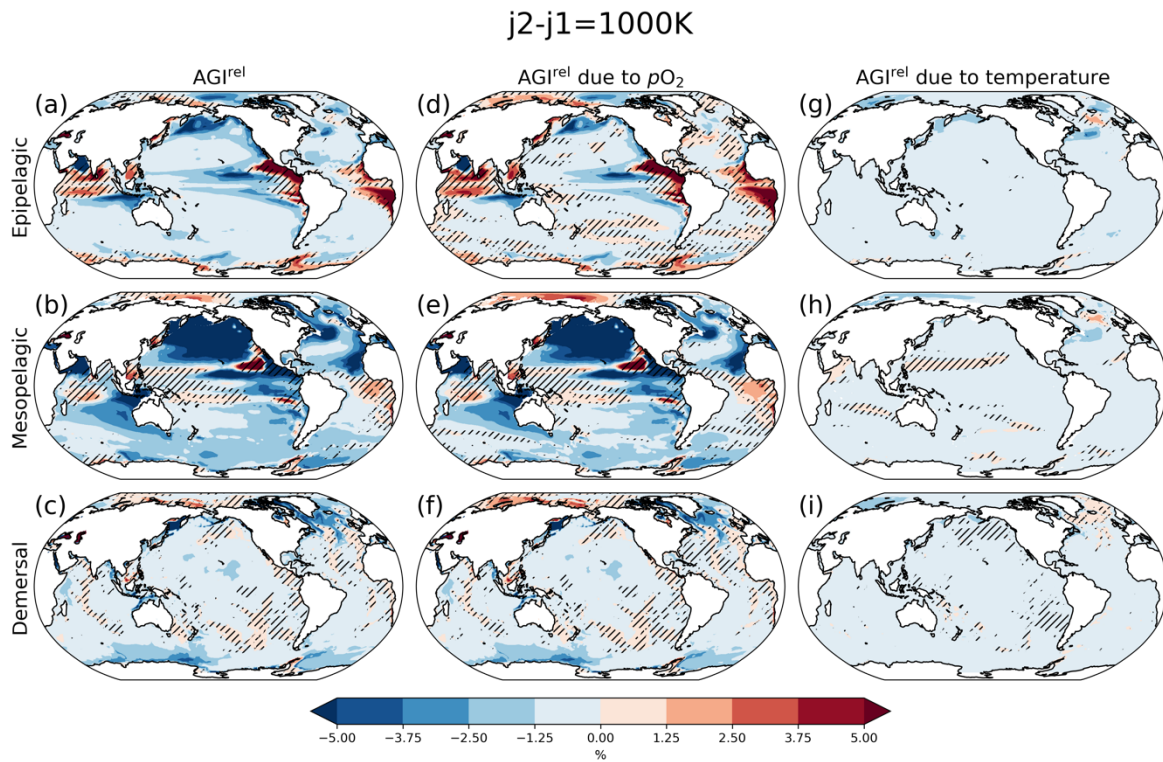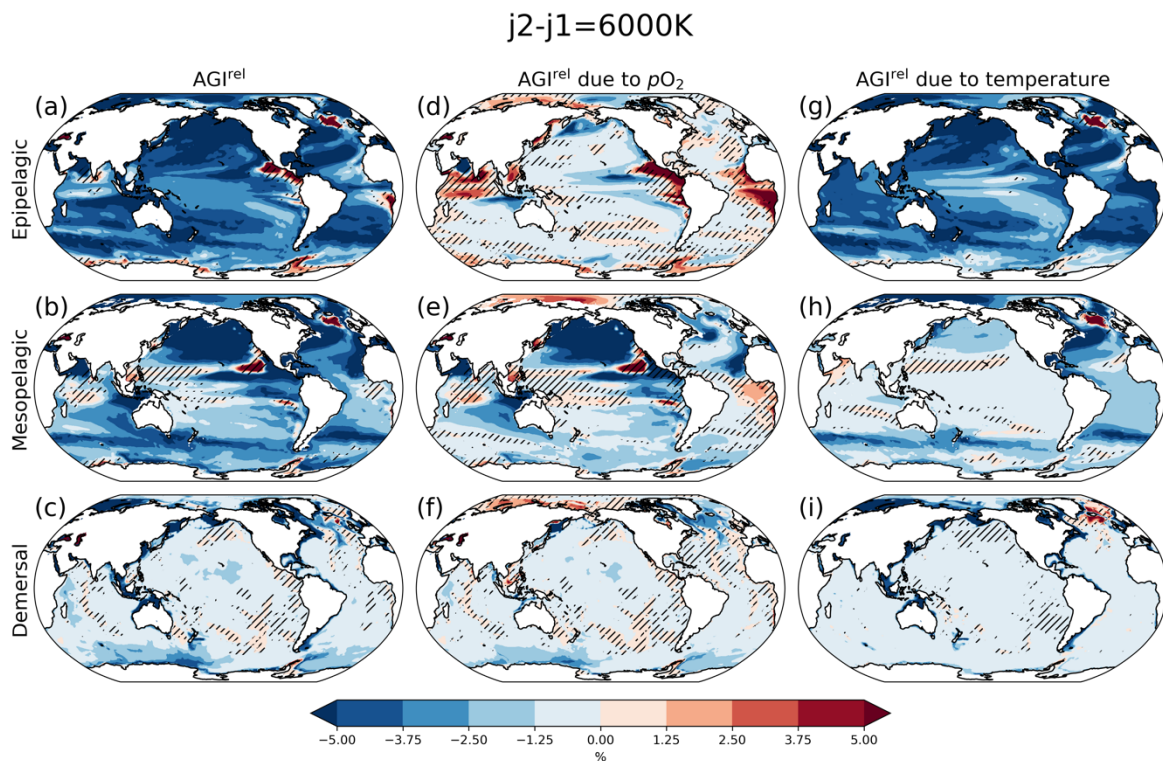

These two figures show how  $j_2-j_1$  modulates the importance of temperature changes on  $AGI^{rel}$  (which also follows from Eq. 2). The sensitivity of  $AGI^{rel}$  to  $j_2-j_1$  is largest in regions where the temperature changes are largest, i.e., in the epipelagic. So, while the results in the figure panels d-f remain the same for any  $j_2-j_1$  (see main text for values), epipelagic  $AGI^{rel}$  changes and to some extent mesopelagic  $AGI^{rel}$  changes (panels a and b) due to the contribution from temperature to  $AGI^{rel}$  as governed by  $j_2-j_1$ :

|                                | <b>AGIrel</b>    | <b>AGIrel due to T</b> |
|--------------------------------|------------------|------------------------|
| <i>j2-j1=1000: Epipelagic</i>  | -0.84 +/- 5.08 % | -0.67 +/- 0.39 %       |
| <i>j2-j1=1000: Mesopelagic</i> | -2.28 +/- 6.93 % | -0.26 +/- 0.34 %       |
| <i>j2-j1=1000: Demersal</i>    | -0.73 +/- 2.03 % | -0.11 +/- 0.28 %       |
| <i>j2-j1=3500: Epipelagic</i>  | -2.49 +/- 5.10 % | -2.32 +/- 1.36 %       |
| <i>j2-j1=3500: Mesopelagic</i> | -3.41 +/- 6.97 % | -0.91 +/- 1.18 %       |
| <i>j2-j1=3500: Demersal</i>    | -1.00 +/- 2.22 % | -0.39 +/- 0.95 %       |
| <i>j2-j1=6000: Epipelagic</i>  | -4.10 +/- 5.28 % | -3.92 +/- 2.28 %       |
| <i>j2-j1=6000: Mesopelagic</i> | -4.03 +/- 7.04 % | -1.54 +/- 1.99 %       |
| <i>j2-j1=6000: Demersal</i>    | -1.26 +/- 2.55 % | -0.07 +/- 1.60 %       |

For the lower limit  $j2-j1$  (1000K), global mean changes in the epipelagic are therefore 34% of the 'standard' ( $j2-j1=3500$ ) while upper limit  $j2-j1$  (6000K) leads to global mean changes 65% larger than in the standard case. In the mesopelagic the effects of changing  $j2-j1$  are smaller due to the smaller changes in temperature, and the mean of the lower limit  $j2-j1$  (1000K) is 67% of the standard case ( $j2-j1=3500$ K) while the upper limit is 18% larger. In the demersal realm the lower limit  $j2-j1$  (1000K) is 73% of the standard case ( $j2-j1=3500$ K) while the upper limit is 26% larger. Note that the  $j2-j1$  range of +/- 70% was used to explore the sensitivity of our results to changes in  $j2$  and  $j1$ . Further work is needed to explore the uncertainty in  $j2$  and  $j1$ .

We will summarize this analysis by adding a sentence to our Sect. 2.1 'Eqs. 1 and 2 show that  $j2-j1$  (8000-4500=3500K) modulates the influence of the temperature effect on AGI.' and to our discussion in Sect 3.2: 'Besides considering this model uncertainty, we performed a sensitivity analysis of AGIrel to the choice of generalized temperature dependence parameters (i.e.,  $j2-j1$ ). If  $j2-j1$  is adjusted to represent low temperature sensitivity of 1000K, global mean AGIrel is 34% of the standard case  $j2-j1=3500$ K in the epipelagic, 67% in the mesopelagic and 73% in the demersal realm. On the other hand, for high temperature sensitivity ( $j2-j1=6000$ K), global mean AGIrel is 165% of the standard case  $j2-j1=3500$ K in the epipelagic, 118% in the mesopelagic and 126% in the demersal realm. Projections for epipelagic species are therefore most sensitive to the choice of  $j2-j1$ , as temperature changes are largest there. Further work is needed to explore the uncertainty in  $j2$  and  $j1$ .'

Regarding species-specific impacts of  $j2-j1$ , we agree with the reviewer that changing  $j2-j1$  will change AGI and therefore AGIcrit as well as the PDF and the slope of the CDF (i.e., for every new set of  $j2-j1$  we need to redo the analysis). We now present a sensitivity analysis for the species *Gadus morhua* and *Thunnus Atlanticus* (new Fig. C7), as most of the projected habitat loss of these species is caused by warming (Fig. 3) and therefore changes in  $j2-j1$  may influence the potential habitat loss. We discuss the result by adding the following to Sect. 3.3 'Moreover, a sensitivity analysis for species *Thunnus atlanticus* and *Gadus morhua* shows that our median result is robust to the choice of the generalized temperature dependence parameters  $j2-j1$  (we explored  $j2-j1 \pm 71\%$ ; Fig. C7).'

As the AGI is comparable the metabolic index and given that it has recently been shown that it cannot be applied to certain species such as *D. gigas* or other species performing vertical migrations (Seibel & Birk, 2022), I wonder if the same limitations may apply to the AGI? which case this type of species should be excluded from the study. Also it may need to be discussed in the manuscript.

We have two vertical migrators in our study: *Dosidicus gigas* and *Aphanopus carbo*. A low  $pO_2$  sensitivity, which could provide a representation of the different aerobic scopes of vertical

migrators, is found for *Dosidicus gigas* (36 mbar), but not for *Aphanopus carbo*. Furthermore, the generalized temperature dependence of AGI may inaccurately cause loss of contemporary habitat due to warming for vertical migrators, while Seibel and Birk (2022) show that distribution ranges are limited at the cold boundary for these species. Because of ongoing discussion on the fate of these species and limited studies available, we decided to keep the species in our study but include a critical discussion on their results (following the suggestion by the other reviewer): *'Our results for the mesopelagic include two vertical migrators (*Dosidicus gigas* and *Aphanopus carbo*). As opposed to most other species, the distribution range of vertical migrators is limited at the cold boundary of the distribution because of their low aerobic scope in cold waters (Seibel and Birk, 2022). Therefore, the temperature sensitivity of these species is likely not captured by the generalized temperature dependence in AGI, and contemporary habitat loss due to warming and deoxygenation as estimated for *Aphanopus carbo* is likely overestimated. We nevertheless project negligible loss of contemporary habitat for *Dosidicus gigas* (Fig. 3) due to its low vulnerability and low pO<sub>2</sub> threshold, which is in good agreement with the findings of Seibel and Birk (2022) despite the generalized temperature dependence of AGI.'*

Line 139: which data? O<sub>2</sub>, T, salinity?

*We replaced 'all' with 'these environmental data' such that it is clear that all environmental data we need are those described in the previous sentence.*

Line 156: please detail a bit more. You mean global mean SST reached by 2100?

*We present our results at different global warming levels, that is global mean air temperatures at 2m. To clarify this, we include a definition as follows: 'All results are presented at global warming levels (i.e., global mean air temperature at 2 m; e.g., Hausfather et al., 2022).'*

#### Results

Line 174 : «habitat viability» suggests you refer to where  $AGI > AGI_{crit}$ , but you refer to  $AGI_{rel}$ . It can be confusing.  $AGI_{rel}$  would indicate «potential viable habitat»? Also, «  $AGI_{rel}$  reduction » is incorrect. AGI is either negative or positive reflecting a decrease or increase in AGI between t<sub>0</sub> and t<sub>1</sub>. Please rephrase.

*$AGI > AGI_{crit}$  can only be assessed for a specific species and, indeed, we here just discuss relative changes in AGI which are species independent. We rephrase lines 172-176 to clarify that  $AGI_{rel}$  is negative when AGI at t=t<sub>1</sub> is lower than contemporary AGI (t=0, i.e., the 1995-2014 mean): 'The warming (Fig. 1a) and deoxygenation (Fig. 1b) reduce AGI relative to its contemporary state (i.e., a negative  $AGI_{rel}$ ), which we interpret as a loss of habitat viability (Sect. 2.1; Fig. 1c) that is independent of species (Eq. 2). In the epipelagic, AGI decreases  $2.17 \pm 0.69$  % per degree of global warming (Fig. 1c), while AGI decreases  $2.33 \pm 1.64$  % per degree of global warming in the mesopelagic/bathypelagic realm. Last, demersal decrease in AGI is  $0.86 \pm 0.48$  % per degree of global warming, making it the least pronounced of the three studied depth intervals.' We also understand that  $AGI_{rel}$  reduction can be confusing and corrected this throughout the manuscript by replacing  $AGI_{rel}$  with AGI where necessary.*

Line 180-191: A figure to show this would be better.

*The values provided here are all shown in Fig. 1: The text aims to emphasize the fact that the maximum ssp1-2.6 scenario changes (the blue lines) are much smaller than the changes in the ssp5-8.5 scenario (the red lines). We made a new appendix Figure C2 where we plot against time, referring to it in the new sentence at line 180: 'Even though our results in Fig. 1 are presented at warming levels, we here highlight that the scenario determines the maximum changes in temperature, pO<sub>2</sub> and  $AGI_{rel}$  (Fig. C2):'*

Line 201: «A relative reduction in habitat viability [...] we expect a reduction in habitat viability ». Please rephrase. See comment above (line 174) relative to «habitat viability ».

*We rephrased this throughout the manuscript as described above. We also clarified the definition of habitat viability and relative changes in habitat viability at the end of Sect. 2.1: 'Where  $\Delta AGI$  is  $AGI(t1)-AGI(t0)$ . Relative changes are thus entirely species-independent (in contrast to the metabolic index of Deutsch et al., 2015) and are interpreted as relative changes in habitat viability. We maintain a reference period 1995-2014 throughout this study (i.e.,  $AGI(t0)$  is the mean  $AGI$  over the years 1995-2014).'*

Line 207: Please detail somewhere how the contribution of  $pO_2$  and T to  $AGI$  and  $AGI_{rel}$  is calculated.

*This is explained in the caption of Fig. 2. We made this more prominent by moving it to the main text at end of Sect. 2.1: 'Contributions from  $pO_2$  (temperature) to  $AGI_{rel}$  are calculated by keeping temperature ( $pO_2$ ) constant at its 1995-2014 mean state when calculating  $AGI_{rel}$ .'), and repeating it in the caption of Fig. 1. See also our response to the next comment.*

Line 209 – 216: Not clear what the difference is between the calculation method of the contribution of  $pO_2$  and T is between line 208-210 and 212-216. For instance, «the  $AGI_{rel}$  due to T is -xx % for the epipelagic» (line 209) and « an average 87 % of  $AGI_{rel}$  is driven by... warming » (line 212). What is the difference between the two? please detail calculation.

*Lines 209-211 quantify Fig. 2 while lines 212-214 are based on the black line versus multi-model mean fits in Fig. 1. As these are slightly different approaches, we understand this is confusing. We updated the values in lines 212-214 to match the values in lines 209-211.*

*The contribution from  $pO_2$  is calculated by keeping temperature at its 1995-2014 and recalculating  $AGI_{rel}$  (and vice versa) as described in the caption of Fig. 2. We explain this calculation now in the main text as well as repeating it in the captions of Fig. 1 and 2 (see response to previous comment).*

Figure 2: please provide the same map as Fig. 2 (and C2) for 1.5 °C and 3°C to be consistent with the remainder of the paper.

*We added the 1.5°C and 3°C versions of Fig. 2 to the appendix as new Figs. C3 and C4 and refer to these in the first sentence of Sect. 3.2 'A relative reduction in habitat viability (i.e., a negative  $AGI_{rel}$ ; Fig. 1c) is projected to occur almost everywhere at 2 °C of global warming (Fig. 2a-c; see Fig. C3 and C4 for 1.5 and 3 °C of global warming, respectively)'. For Original Fig C2 (the original Fig. 2 model range), we notice differences are very small between warming levels (see figure on next page). Therefore, we provide still only the 2°C warming level in Fig. C2 (which is newly numbered C5).*

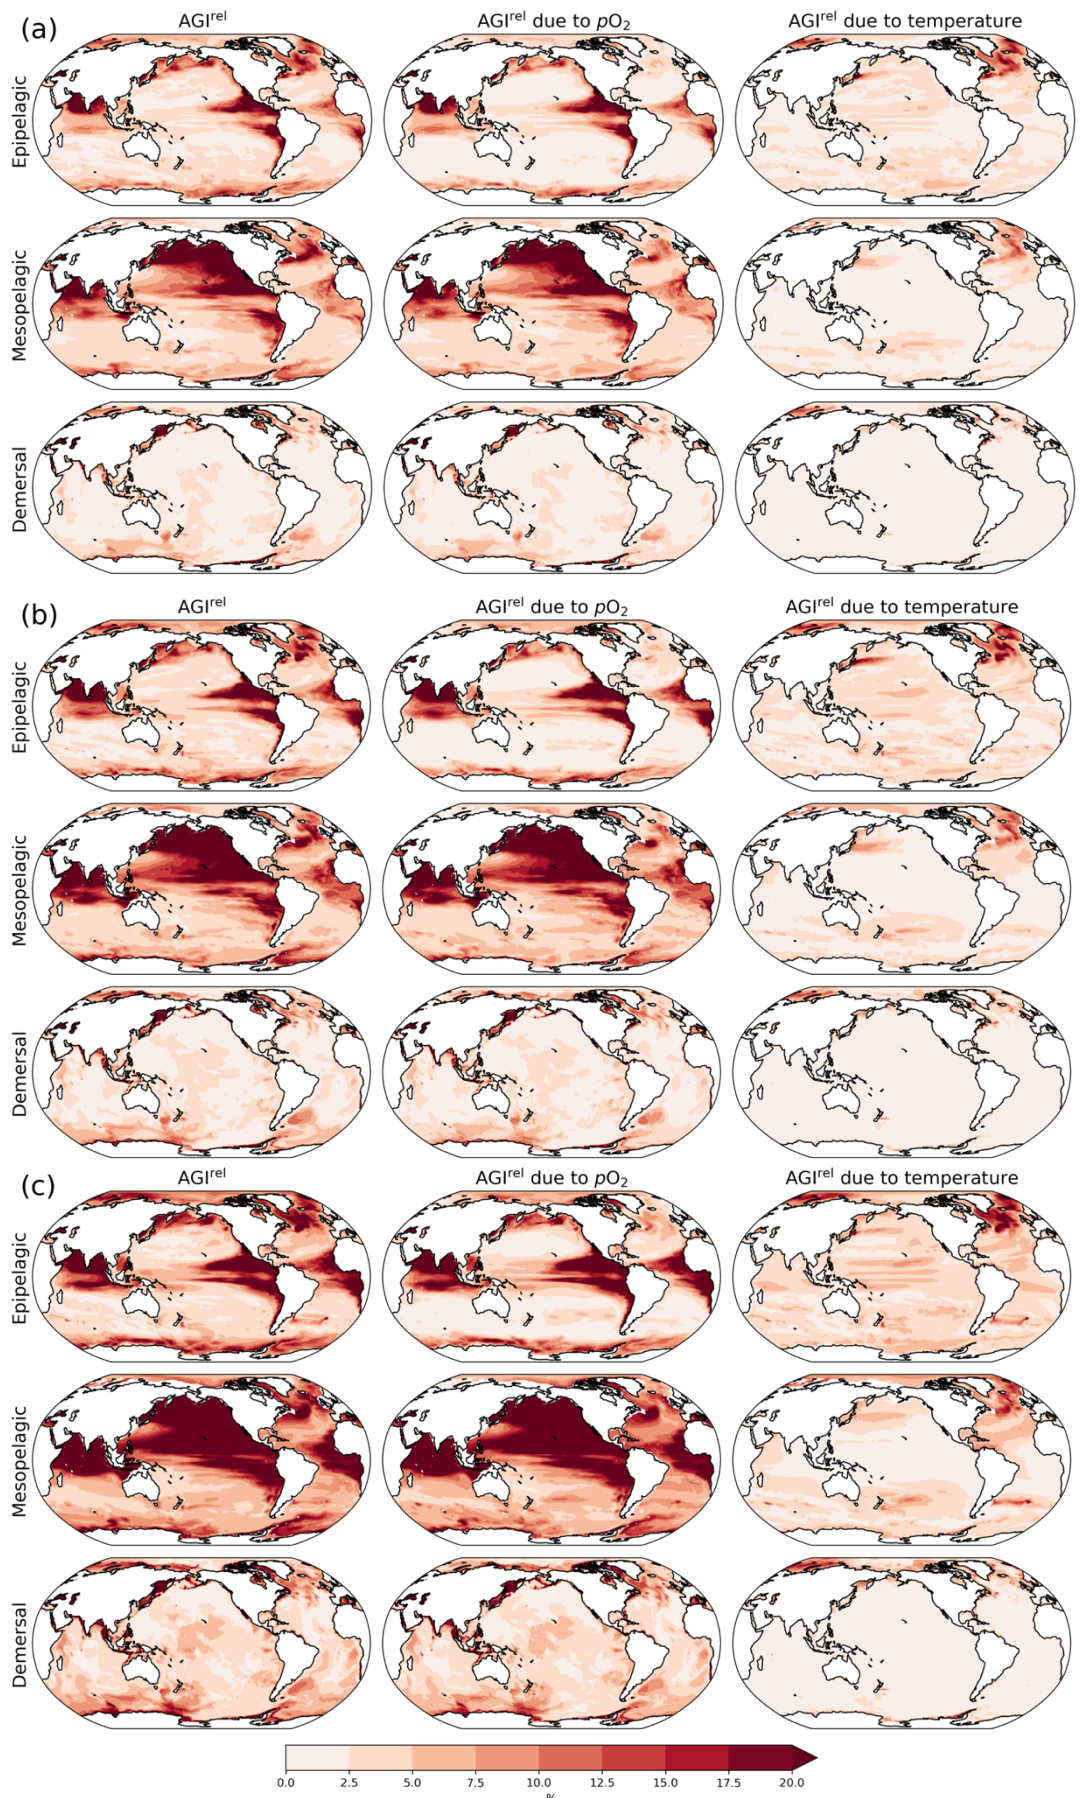

As original figure C2 but for (a) 1.5, (b) 2, and (c) 3 degC warming.



Fig C3 caption: « AGIcrit as the minimum in-habitat AGI value, the 5th percentile, the 10th percentile, the 15th percentile and the 20th percentile ». Word missing?

We rephrase as '*AGIcrit is taken as the minimum in-habitat AGI value, the 5th percentile, the 10th percentile, the 15th percentile and the 20th percentile, respectively.*'

Line 242-246: in the text, changes in viable habitat are expressed in terms of habitat loss, but in the referenced figure (Fig. 3) changes in viable habitat are expressed in terms of remaining habitat. Please be consistent.

Thank you for noting that. We have replaced original Figs. 3, C3 and C7 to have habitat change on the y-axis (with habitat loss being negative).

Line 256: please define "absolute loss".

We add a definition here: '*loss expressed in volumetric terms instead of a percentage*'

Figure 3: not clear how the different models/scenarios are represented or used for the calculation of changes in viability.

In the caption we state '*For 1.5°C global warming both the SSP1-2.6 and SSP5-8.5 scenarios are included (number of datapoints  $n=2$  scenarios \* 6 models = 12 for each boxplot), while at higher levels of global warming we use SSP5-8.5 as not all models reach these warming levels under the SSP1-2.6 scenario ( $n=6$  models).*' Such statements are made in every figure caption where this is relevant. To clarify this approach, we added a sentence at the end of Section 2.3 where we explain how we handle the presentation of our results for warming levels: '*For warming levels above 1.5°C, we only use the results for SSP5-8.5 as not all models reach warming of more than 1.5°C in SSP1-2.6.*'

Fig. 5: for which degree of warming? Scenario? Period of AGI? Please precise in the figure caption. Also C4 is presented for a 3°C global warming. For the purpose of the demonstration, I understand that the chosen level is not determining, but consistency between figs within the same result section would be better to support the demonstration. Also distribution of AGI +/-.

Fig. 5 is a schematic/conceptual figure, therefore only the 1995-2014 contemporary state is 'real' and representative of the chosen species.  $\Delta$ AGI is chosen at 0.1 just for illustrative purposes and does not represent a specific warming level, period or scenario (as a specific choice there would create a different  $\Delta$ AGI for each species, preventing us from illustrating that for the same  $\Delta$ AGI a different  $\Delta$ volume is realized). We extended the caption of Fig. 5 to clarify: '*Conceptual figure based on *Thunnus atlanticus* (a,c) and *Thunnus obesus* (b,d) showing the difference in impact (change in volume  $\Delta V$ ) of an example mean AGI reduction of 0.1 (i.e., habitat-mean  $\Delta$ AGI=0.1) below the 1995-2014 contemporary mean (black lines). This difference is shown to be related to the shape of the PDF and the slope of the CDF at 0.1 (i.e., at AGIcrit), which we refer to as the species' "vulnerability".'. In contrast to Fig. 5, the original Fig. C4 contains actual results and we chose to show the most extreme warming level studied here (i.e., 3degC) alongside the contemporary state (the black lines). We propose to clarify this choice in the first sentence of Section 3.4: '*The differences in habitat loss between species as shown in Figs. 3 or 4 are better understood from the probability density of contemporary (1995-2014) in-habitat AGI for each species (conceptual Fig. 5 and species results in Fig. C8).*'*

Line 316: "The correspondent linear equation taken across all depth realms is *volume loss (%) = 7.31 \* vulnerability - 0.10.*" not useful.

We realize this linear fit depends on the warming level chosen and therefore remove this sentence.

Line 322:  $\Delta AGI$  is  $AGI(t_1) - AGI(t_0)$ ? please define.

*We now define  $\Delta AGI$  in the methods section with Eq. 2: 'Where  $\Delta AGI$  is  $AGI(t_1) - AGI(t_0)$ .'*

Fig 6: please provide same for 1.5 and 3 °C. Also, why only SSP5-8.5?

*We clarified our use of SSP5-8.5 as described in our response to the comment on Fig. 3.*

*Similar figures for 1.5 and 3degC warming are added to the appendix and we add the text 'This result holds across different levels of global warming: At 1.5°C of global warming, 85% of the variance in volume loss can be explained by vulnerability, and at 3°C of global warming this is 88% (see Figs. C10 and C11).' As the highlighted species are based on fixed thresholds, we clarify that this discussion is just for the results of 2degC warming: 'We highlight three groups of species for further discussion of the results at 2°C of global warming' and keep the scatter plot black in the new appendix figures.*

Line 336-337: any hypothesis regarding those two species?

*We explain in some more detail by adding the sentence: 'These two species are both demersal-dwelling and are very pO2 tolerant (i.e., low pO2threshold; Table A1) and have a wide range of different AGI values in their habitat, with a relatively large volume of high-AGI values causing the right skew (Fig. C8) and resilience (Fig. C12).'*

Technical comments

Line 43: ref Bopp et al. 2013 is about CMIP5

*We moved the IPCC (2019) and Bopp et al. (2013) to the more general statement two sentences before: 'This negative trend is projected to continue during the 21st century for all climate scenarios (Bopp et al., 2013; IPCC, 2019; Kwiatkowski et al., 2020).'*

Line 139: please specify «all data»

*We replaced 'all' with 'these environmental data' here such that it is clear that all environmental data we need are these described in the previous sentence.*

Line 201: «reduction in AGIrel», see comment above.

*We rephrased this throughout the manuscript as described above.*

Line 204: «AGIrel reduction» see comment above.

*We rephrase this throughout the manuscript as described above.*

Line 229: «decrease in AGIrel», see comment above. See also line 231, 239

*We rephrase this throughout the manuscript as described above.*

Line 240: habitat volume is where  $AGI > AGI_{crit}$ ? Please precise.

*We clarified this by elaborating on the definition of loss of contemporary habitat volume 'loss of contemporary habitat volume (i.e., newly exposed volume with  $AGI < AGI_{crit}$ ) [...]*

Line 291-296: Please precise which period of the AGI is used for the PDF.

*We extended both the caption of Fig. 5 which now reads 'Conceptual figure based on Thunnus atlanticus (a,c) and Thunnus obesus (b,d) showing the difference in impact (change in volume  $\Delta V$ ) of an example mean AGI reduction of 0.1 (i.e., habitat-mean  $\Delta AGI = 0.1$ ) below the 1995-2014 contemporary mean (black lines). This difference is shown to be related to the shape of the PDF and the slope of the CDF at 0.1 (i.e., at  $AGI_{crit}$ ), which we refer to as the species' "vulnerability".' as well as the first sentence of this section which now reads 'The differences in habitat loss between species as shown in Figs. 3 or 4 are better understood from the probability density of contemporary (1995-2014) in-habitat AGI for each species (conceptual Fig. 5 and species results in Fig. C8).' to clarify how we calculated the vulnerability.*

Line 302: Only → only

*Done*

Line 303: In → An

*Done*

Line 306: indicates → remove s

*Done*

## Response to Comments by 'Anonymous Referee #2'

The manuscript «Impact of deoxygenation and warming on global marine species in the 21st century» assesses the potential effects of changes in ocean temperature and pO<sub>2</sub> on the viability of current marine habitats. The computation of a metabolic index (the AGI), which depends on temperature, oxygen and few easily-accessible species-specific parameters, allows the authors to explore the species' (47 selected species) vulnerability to environmental changes during the current century. Environmental data rely on six ESM. The authors first discuss the projected global and regional changes on ocean temperature, pO<sub>2</sub>, and AGI by degrees of global warming. Then, they present the loss/gain of viable habitat volume with respect to current habitats as future AGI index falls below a critical value considered to be a threshold for holding aerobic activity. Moreover, authors assess the “vulnerability” of a species by computing the probability density function of AGI computations for each species, and evaluate the volume of viable habitat loss with respect to reductions in AGI. Authors discuss the novelties (including vertical and seasonal variability, species representativeness,..) and limitations (temporal resolution, deoxygenation underestimation, adaptation capability of species,...) of their approach. They finally highlight the key points of the study.

As I understand from the manuscript, three-dimensional monthly data (temperature, oxygen content, and salinity) from six ESM simulations (bias and drift corrected) following historical and two (low and high) emission scenarios were used to determine the habitat viability of 47 different marine species. Species were selected in order to be representative for different climatic zones, sizes and vertical levels. Viability was analyzed by using the AGI index, which depends on temperature and pO<sub>2</sub> along with two species-specific parameters (they can be determined by using the species distribution data), and which gives information on the aerobic state of an ecosystems and, hence, of the species. Global and regional variation of temperature, pO<sub>2</sub> and AGI, as well as the relative contribution of each of AGI drivers (i.e., AGI due to pO<sub>2</sub>, and AGI due to temperature) were evaluated. Then, the relative change of AGI with respect to current situation was assessed giving information of the habitability loss/gain for each species. From the probability density distribution of each species' AGI, a “vulnerability” of each individual species was computed. This exercise highlighted that the vulnerability of a species not only depends on the volume loss (volume below a critical value of AGI) but also on the habitat volume in sub-critical values of AGI. According to the loss in habitable volume and the vulnerability, species were classified in three groups; highly affected, resilient, and vulnerable species. From these results, authors discussed the limitations of the study and highlighted the main messages.

The study is scientifically relevant and worth publishing as it introduces the potential utility of a metabolic state index like AGI to evaluate how species will be affected by changes in their environment. I only have some comments which, I hope, are useful to improve the manuscript.

*We thank the reviewer for the positive assessment of our manuscript.*

I have some doubts understanding the vertical distribution of the layers considered. As I understand, horizontal distributional data is extended in the vertical over the depth range of species distribution. However, this is not exactly the case as some species crosses the limits of epipelagic and mesopelagic layers as they are defined in the text. This is especially true for some mesopelagic species that live in the deepest limit of the layer to below, while others are considered in the same layer but lives closer to epipelagic waters. I think a detailed analysis (maybe out of the intention of this study) should include the “real” depth range for each species as informed in their distributional data.

*We agree that including the 'real depth range' would be desirable, however this is not possible due to data sparsity: We have this described in original lines 383-387: "Our assumption to extend the 2D distributions provided by Close et al. (2006) over the entire depth range of each species' depth realm is driven by data sparsity and reliability of 3D species distributions for our selection of species. When reliable 3D habitats can be constructed from species' observations these could be included (e.g., distribution data are continuously collected in the Ocean Biodiversity Information System but currently are too sparse to provide 3D distribution data) "*

*We extended our current discussion (near original lines 383-387) on the impact of our assumption to vertically extend the 2D habitats over a 'grouped' depth range: 'Some species may be limited to only part of their assigned depth range or live partly (and possibly temporarily) above or below it. Nevertheless, we expect that the assigned depth range generally provides a good estimate of in-habitat pO<sub>2</sub> and temperature variability, which affects pO<sub>2</sub> threshold, T<sub>pref</sub> and therefore AGI and AGI<sub>crit</sub>.'*

Moreover, as has been recently pointed out (Seibel & Birk, 2022), organisms carried out vertical migration have specific metabolic constraints that make them difficult to assess using current metabolic indexes. Do the authors think this might be plausible as well for AGI? How this affects results? I think these issues should be commented in the text.

*Thank you for pointing this out. We extended our discussion with the following text to address our study's potential limitation: 'Our results for the mesopelagic include two vertical migrators (Dosidicus gigas and Aphanopus carbo). As opposed to most other species, the distribution range of vertical migrators is limited at the cold boundary of the distribution because of their low aerobic scope in cold waters (Seibel and Birk, 2022). Therefore, the temperature sensitivity of these species is likely not captured by the generalized temperature dependence in AGI, and contemporary habitat loss due to warming and deoxygenation as estimated for Aphanopus carbo is likely overestimated. We nevertheless project negligible loss of contemporary habitat for Dosidicus gigas (Fig. 3) thanks to its low vulnerability and low pO<sub>2</sub> threshold, which is in better agreement with the findings of Seibel and Birk (2022) despite the generalized temperature dependence of AGI.'*

In my opinion, some lines should be added to the discussion section to properly discuss the implications of the results. What differences were found between scenarios? How this new method can help in managing fisheries for example in the future? Although I recognize this can be out of the scope of the paper, I think the manuscript would benefit from a short discussion on these issues.

*We include a discussion on the implications of our work in the revised version of our manuscript by extending the last paragraph of our discussion which now reads as follows: 'For most species we find a loss of habitat volume of less than 10%. It is found for example by Gotelli et al. (2021) that only a small percentage of species drives the observed changes in marine species assemblages, showing that even when only a few species experience large losses, impacts can be profound for the ecosystem. For the individual species however, the loss of only a small fraction of their contemporary habitat likely provides adaptation opportunities. Our results imply that species that are deemed vulnerable due to their limited range of in-habitat pO<sub>2</sub> and temperature are likely to be the most impacted by global warming (i.e., 'vulnerable species' in Fig. 6 and species with steep CDF slopes in Fig. C9). Our study can therefore inform e.g., fisheries management by identifying species particularly vulnerable to ocean warming and deoxygenation. Such identification provides species-specific information complementing earlier studies that found reduced impact on fisheries at lower levels of global warming (Cheung et al., 2016). Indeed, for every tenth of a degree of additional global warming, our study shows increased marine deoxygenation and warming as well as increased loss of contemporary habitat across all species albeit with a strongly species-specific magnitude.'*

*These results confirm the need to limit global warming levels to the minimum to prevent loss of contemporary habitat and support the identification of the species that would be most vulnerable to marine deoxygenation and warming.'*

Regarding the conclusions of the paper, I think the authors could make a more narrative presentation of the key messages.

*Thank you for your suggestion. We prefer a list of conclusions and keep the text as is*

Finally, I found some sections hard to understand, especially, section 3.4. which in fact I consider it is the 'key' of the manuscript. I feel that some more information is needed, maybe in a supplementary methodology section, to better explain the computation of vulnerability.

*We extended the methodology paragraphs (~first half of Sect. 3.4) to better explain the computation of vulnerability and make it clearer that Fig. 5 is a schematic/conceptual figure. We refer to this in the main text as it indeed is a key part of our result. Our new text reads: 'The differences in habitat loss between species as shown in Figs. 3 or 4 are better understood from the probability density of contemporary (1995-2014) in-habitat AGI for each species (conceptual Fig. 5 and species results in Fig. C8). The spatial variability of the contemporary pO<sub>2</sub> and temperature in each species' habitat results in a species-specific probability density function (PDF) for AGI (black lines in Fig. 5a,b). Depending on this shape, a given reduction in AGI ( $\Delta$ AGI) exposes a relatively large or small part of the species' habitat to subcritical AGI values (red lines and stippling in Fig. 5a,b), thereby causing volume loss. We can quantify the "vulnerability" of a species to changes in AGI by calculating the cumulative sum of the PDFs (i.e., the cumulative density function, CDF, conceptual Figs. 5c,d and species-specific results in C9). The slope of the CDF at a cumulative density of 0.1 (i.e., 10% of the volume where AGI<sub>crit</sub> is defined) indicates the potential loss in habitat for a certain change in AGI (Fig. 5 and C9). If the slope of the CDF is steep at the critical threshold, the species is relatively vulnerable to warming and deoxygenation: only a small reduction in habitat viability (i.e., AGI) will push a relatively large volume below the critical threshold. An example is given in Fig. 5, where for an identical change in mean in-habitat AGI of 0.1 just 1% of the volume is pushed below AGI<sub>crit</sub> for a species with a small slope of 0.14 (Fig. 5b,d, 'Thunnus obesus' schematic), while the same change in AGI results in 9% volume loss for a species with a large slope of 1.67 (Fig. a,c, 'Thunnus atlanticus' schematic). Changes in the slope of some species' CDFs indicate that different vulnerabilities exist for different parts of that species' habitat (Fig. C9). Hence, in habitat areas that are represented by a part of the CDF with a relatively steep slope, a relatively small change in AGI is needed to bring a relatively large volume closer to AGI<sub>crit</sub>. Nevertheless, only the CDF slope at AGI<sub>crit</sub> relates directly to viable habitat volume loss as only AGI values below AGI<sub>crit</sub> are considered to have an impact on habitat volume.'*

Specific comments about the text and figures:

Line 9: I would change to: "...the observed and projected warming and deoxygenation of the world's ocean in the 21st century may strongly affect marine species' habitats."

*Done*

Line 11: Change "We" to "in a particular location, to assess..."

*We prefer to keep this split as otherwise the sentence is 4 lines long.*

Lines 19 – 20: I find this can be rephrased.

*We rephrased this sentence in the revised version of the manuscript: 'In the event of potential large habitat losses (over 5%), species vulnerability is the most important indicator. Vulnerability is more critical than changes in habitat viability, temperature or pO<sub>2</sub> levels.'*

Line 21: I think this “is” should be after “epipelagic species”.

*Done*

Line 43: Bopp et al., 2013 is about CMIP5, not SSP5-8.5 scenario.

*We moved the IPCC (2019) and Bopp et al. (2013) to the more general statement two sentences before: ‘This negative trend is projected to continue during the 21st century for all climate scenarios (Bopp et al., 2013; IPCC, 2019; Kwiatkowski et al., 2020).’*

Line 46: I think this is not about “impacts” but just trends. In addition, I would split here the paragraph, and start a new one with temperature.

*We replaced by ‘., indicating the possibility of even stronger trends of deoxygenation toward the future’. And started a new paragraph with temperature.*

Line 72: “to a species,”.

*We added ‘to’ as suggested.*

Line 105: I think considering the nomenclature of mesopelagic and bathypelagic is problematic. As only 200 to 1000 m is considered, I would say mesopelagic layer. Bathypelagic is usually considered for depths ranging 1000 m to below.

*Thank you for noting this. We have removed the wording ‘bathypelagic’ from the text and figures as only the depth range 200-1000m was analysed.*

Line 132: It is in fact the 200 to 1000 m depth range representative of the species considered? Daily migration can have some effects?

*The entire 200-1000 meter depth range is considered for mesopelagic species, considering bathymetry as well as the 2D habitat (Fig. C1). We decided to do the grouping of species into depth groups due to lack of observational data on 3D habitats (let alone how these change within or between days). Daily migration and even seasonal migration within this space (in both the vertical and horizontal, or only part of this space) may indeed occur for some species, however we still expect the entire volume to represent the O<sub>2</sub> and temperature variability that is needed to calculate o<sub>2</sub>threshold and T<sub>pref</sub>. We explore the effects of different AGI<sub>crit</sub> (which would be found for different o<sub>2</sub>thresh and T<sub>pref</sub> estimates) in original Fig. C3. We extended the discussion by adjusting line 385 to: ‘When reliable 3D habitats, or even time-varying habitats, can be constructed from species’ observations these could be included (e.g., distribution data are continuously collected in the Ocean Biodiversity Information System but currently are too sparse to provide 3D distribution data).’*

Line 160: In figure 1 it is indicated a 20-year running.

*Thank you for noting this. This should have been removed from an earlier version of the manuscript, we plot the actual data here in light blue/red and take the model mean (no running mean) in opaque blue and red. Only the denoted years are based on 20-year model-mean data. Therefore, the caption now reads: ‘The multi-model mean is given in opaque blue (SSP1-2.6) and red (SSP5-8.5) and has for several decades the corresponding 20-year multi-model mean year labelled.’*

Line 203: “is generally larger in”.

*Done*

Line 211: I would remove “Globally”, it seems redundant here.

*Removed*

Line 223: “uncertain” refers to multimodel uncertainty?

*Yes: we replace ‘is uncertain’ with ‘has large model uncertainty’.*

Line 223: I don't understand what regions are referred to with "eastern-boundary equatorial upwelling regions".

*We removed the word equatorial, thank you for noting this.*

Line 229: "to some small parts".

*Done.*

Line 240: I would substitute or remove "local extinction". Organisms may also move or adapt to new conditions.

*We removed this as suggested.*

Lines 256 to 264: This is somehow expected; big losses in large-distributed species would account for small relative losses.

*We agree: We do want to highlight this as the relatively minor relative losses should not be disregarded as necessarily unimpactful. We keep the text as it is.*

Line 286: What "realized loss" is referred to?

*We meant to refer to the loss at a certain degree of global warming but now removed the word 'realized' in order to make this more general.*

Line 304: I think some concepts here should be better explained/introduced, like  $\Delta AGI$ .

*We propose to define  $\Delta AGI$  already in Sect. 2.1 after defining  $AGI_{rel}$  in Eq. 2: 'Where  $\Delta AGI$  is  $AGI(t_1) - AGI(t_0)$ ,' as well as clarifying  $\Delta AGI$  in the caption of Fig. 5 which now reads: 'Conceptual figure based on *Thunnus atlanticus* (a,c) and *Thunnus obesus* (b,d) showing the difference in impact (change in volume  $\Delta V$ ) of an example mean  $AGI$  reduction of 0.1 (i.e., habitat-mean  $\Delta AGI = 0.1$ ) below the 1995-2014 contemporary mean (black lines). This difference is shown to be related to the shape of the PDF and the slope of the CDF at 0.1 (i.e., at  $AGI_{crit}$ ), which we refer to as the species' "vulnerability".'*

Line 316: This is an important point of the study that can be put upfront in the discussion/conclusions.

*We find that this linear equation is naturally dependent on the warming level chosen for the figure (2°C) and should therefore not be overinterpreted. In order to prevent this, we remove the equation from the text and add the same figure but then for 1.5 and 3°C warming in the appendix (also following the feedback from the other reviewer, see our response to their comments on Fig. 6).*

Line 350: It might be good to include a discussion on the implications of the results that complement the discussion of the limitations of the work.

*We include a discussion on the implications of our work in the revised version of our manuscript by extending the original last paragraph of the discussion (see our response above to your similar comment).*

Figure 1:

- I think "transparent blue and red" may be changed to "light blue and red".

*Done*

- Indicate that  $AGI$  is given in percentage in the first time it is called within the caption.

*We updated the caption to include the units of temperature,  $pO_2$  and  $AGI_{rel}$  in its first sentence: 'Global mean changes in ocean in-situ temperature in °C (a),  $pO_2$  in mbar (b) and  $AGI_{rel}$  in % (c) for different global warming levels, where global warming is calculated as global surface air*



temperature increase relative to the 1850-1900 mean.'. and remove the percentage '%' later in the caption.

- Though I like the idea of presenting results relative to global warming, I think it is somewhat more difficult to read because of the length of y-axis. I suggest to increase the readability of the figure to change the order to two lines; in the top line, panels a) and b) are displayed, and in a second line below that, panel c) is displayed. Something like (sorry for the bad picture...).

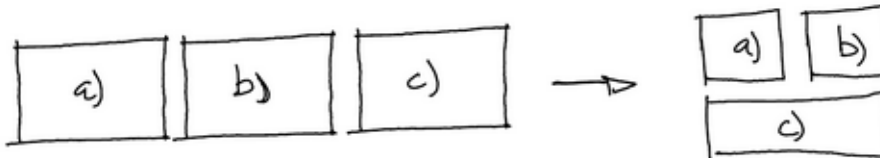

We thank you for this suggestion. We tried the new layout but found it too busy and repetitive as compared to the original:

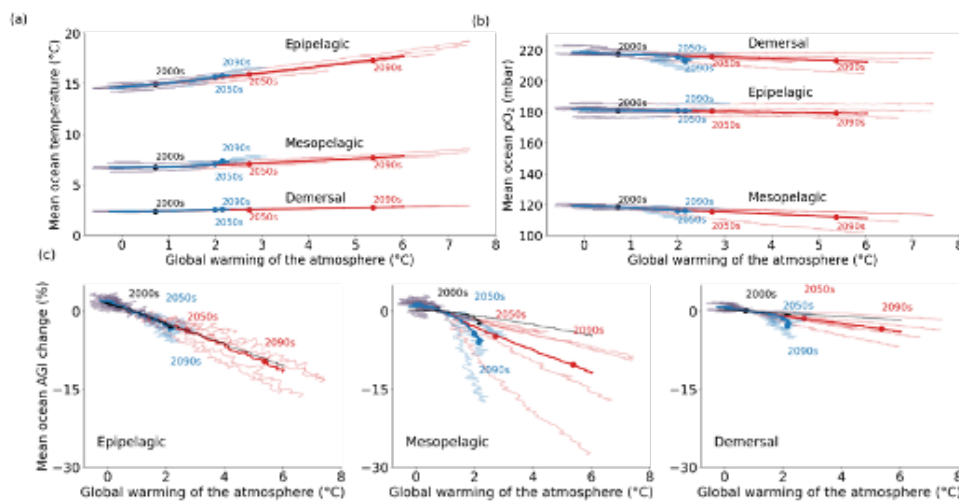

Instead, we hope to have addressed your concern regarding the y-axis by making the original figure taller.

Very minor, but color of Fig. C1 is blue but it is indicated in the figure caption to be dark grey.

We corrected 'dark grey' to 'blue' in the caption of Fig. C1.

# Impact of deoxygenation and warming on global marine species in the 21st century

Anne L. Morée<sup>1,2</sup>, Tayler M. Clarke<sup>3</sup>, William W. L. Cheung<sup>3</sup>, Thomas L. Frölicher<sup>1,2</sup>

<sup>1</sup>Climate and Environmental Physics, Physics Institute, University of Bern, Bern, 3012, Switzerland

5 <sup>2</sup>Oeschger Centre for Climate Change Research, University of Bern, Bern, 3012, Switzerland

<sup>3</sup>Institute for the Oceans and Fisheries, The University of British Columbia, Vancouver, BC V6T 1Z4, Canada

*Correspondence to:* Anne L. Morée (anne.moree@unibe.ch)

**Abstract.** Ocean temperature and dissolved oxygen shape marine habitats in interplay with species' physiological characteristics. Therefore, the observed and projected warming and deoxygenation ~~in the 21<sup>st</sup> century~~ of the world's oceans ~~in~~  
10 ~~the 21<sup>st</sup> century~~ may strongly affect species' habitats. Here, we implement an extended version of the Aerobic Growth Index (AGI), which quantifies whether a viable population of a species can be sustained in a particular location. We assess the impact of projected deoxygenation and warming on the contemporary habitat of 47 representative marine species covering the epipelagic, mesopelagic/~~bathypelagic~~, and demersal realms. AGI is calculated for these species for the historical period and into the 21<sup>st</sup> century using bias-corrected environmental data from six comprehensive Earth System Models. While habitat  
15 viability decreases nearly everywhere with global warming, ~~the~~ impact of this decrease is strongly species-dependent. Most species lose less than 5% of their contemporary habitat volume over the 21<sup>st</sup> century ~~even~~ at ~~23~~°C of global warming relative to preindustrial, although some individual species are projected to incur losses 2-3 times greater than that. We find that the ~~in-~~  
~~habitat contemporary~~ spatiotemporal variability of O<sub>2</sub> and temperature (and hence AGI) provides a quantifiable measure of a species' vulnerability to change. ~~In the event of potential large habitat losses (over 5%), species vulnerability is the most~~  
20 ~~important indicator. Vulnerability is therefore more critical than changes in habitat viability, temperature or pO<sub>2</sub> levels. Species' vulnerability is the most important indicator for large (>5%) potential habitat losses not relative or absolute changes in habitat viability (i.e., AGI<sup>rel</sup> or ΔAGI), temperature or O<sub>2</sub>.~~ Loss of contemporary habitat ~~is is~~ for most epipelagic species driven by ~~the~~ warming of ocean water and is therefore ~~expanded-elevated~~ with increased levels of global warming. In the mesopelagic/~~bathypelagic~~ and demersal realms habitat loss is also affected by pO<sub>2</sub> decrease for some species. Our analysis is  
25 constrained by the uncertainties involved in species-specific critical thresholds, which we quantify, by data limitations on 3D species distributions as well as by high uncertainty in model O<sub>2</sub> projections in equatorial regions. Focus on these topics in future research will strengthen our confidence in assessing climate-change driven losses of contemporary habitat across the global oceans.

## 1 Introduction

30 Ocean temperature and dissolved oxygen (O<sub>2</sub>) are strongly linked by physical and biogeochemical processes as well as through their effects on the aerobic performance of aquatic ectotherms (Pörtner, 2010; Verberk et al., 2011; Breitburg et al., 2018; Oeschlies et al., 2018; Seibel et al., 2021). Indeed, temperature and O<sub>2</sub> are both found to be central in shaping species' distributions and are important climatic stressors to marine species worldwide (Perry et al., 2005; Doney et al., 2011; Poloczanska et al., 2013; Breitburg et al., 2018; Penn et al., 2018; Deutsch et al., 2020; Clarke et al., 2021). Observed and  
35 projected warming and deoxygenation are therefore likely to impact species.

Robust observational evidence of anthropogenically-forced deoxygenation is now becoming available as long-term O<sub>2</sub> changes emerge from their natural variability (Frölicher et al., 2009; Long et al., 2016; Stramma et al., 2020; Buchanan and Tagliabue, 2021; Sharp et al., 2022). Specifically, an increase in the temporal and spatial resolution of observational data has allowed for the discovery and quantification of a ~2% decline in the global top-1000m O<sub>2</sub> inventory since the 1960s (Ito et al., 2017; Oeschlies et al., 2017; Schmidtko et al., 2017; Breitburg et al., 2018). This negative trend is projected to continue during the  
40 21<sup>st</sup> century for all climate scenarios (Bopp et al., 2013; IPCC, 2019; Kwiatkowski et al., 2020). More than 10% of deep ocean O<sub>2</sub> is likely to be lost even if CO<sub>2</sub> emissions were stopped in the year 2020 (Oeschlies, 2021). Earth System Model simulations project an O<sub>2</sub> loss between 100-600 meter depth of 13.27±5.28 mmol m<sup>-3</sup> for a high-emission low-mitigation SSP5-8.5 scenario and 6.36±2.92 mmol m<sup>-3</sup> loss for a ~~low~~high-emission ~~high~~low-mitigation SSP1-2.6 scenario by the end of the 21<sup>st</sup> century  
45 (2080-2099 mean values relative to 1870–1899 ± the inter-model standard deviation; Kwiatkowski et al., 2020).

However, simulated trends seem to underestimate trends in observations (Andrews et al., 2013; Oeschlies et al., 2017; Oeschlies et al., 2018; Buchanan and Tagliabue, 2021) and models poorly represent tropical Pacific Oxygen Minimum Zones (Cocco et al., 2013; Cabré et al., 2015), indicating ~~the possibility of~~ even ~~stronger~~~~higher~~ ~~possible~~ ~~trends~~~~impacts~~ of deoxygenation toward the future.

50 Ocean temperatures are changing as well: Ocean warming is a direct effect of atmospheric warming, as the ocean takes up approximately 90% of the excess heat from anthropogenic activities (Von Schuckmann et al., 2020). Global mean sea surface temperatures are observed to have increased by ~0.5 °C since the 1960s (Hersbach et al., 2020). Earth System Model simulations project sea surface warming of 3.5±0.8°C for a high-emission low-mitigation SSP5-8.5 scenario and 1.42±0.32°C warming for a low-emission high-mitigation SSP1-2.6 scenario by the end of the 21<sup>st</sup> century (2080–2099 mean values relative  
55 to 1870–1899; Kwiatkowski et al., 2020). Most marine species will thus experience further warming of their habitat, considering that chances of limiting global atmospheric warming to 1.5°C are low even if all and unconditional pledges by countries are implemented in full and on time (IPCC, 2021; Meinshausen et al., 2022). Models that include more complex representations of species biology and ecology show that every tenth of ~~a~~ degree of global warming increases impacts on marine biodiversity, transforming species assemblages through changes in abundance, biomass and catch potential (Cheung et al., 2016). Moreover, the warming signal penetrates the deep ocean where it has major potential to affect marine ecosystems  
60 together with deoxygenation and ocean acidification (Levin and Le Bris, 2015).

From a biogeochemical perspective, changes in O<sub>2</sub> content of a water parcel are driven by a combination of a) changes in O<sub>2</sub> solubility due to changes in temperature [and salinity](#), b) changes in ventilation and stratification of the water column and associated changes in O<sub>2</sub> supply, c) changes in [the partial pressure of O<sub>2</sub> \(pO<sub>2</sub>\)](#) due to gas diffusion rates that depend on temperature, and d) changes in large-scale biological consumption of O<sub>2</sub> (Keeling et al., 2010; Kwiatkowski et al., 2020; Buchanan and Tagliabue, 2021; Oschlies, 2021; Pitcher et al., 2021). The relative importance of these mechanisms for deoxygenation varies in space and time (e.g., Frölicher et al., 2009; Keeling et al., 2010; Frölicher et al., 2020), which makes it challenging to attribute local deoxygenation to a single driver (Pitcher et al., 2021). Generally ~~however~~, O<sub>2</sub> has reduced over the past ~60 years due to a combination of a-c in the extratropical oceans, while changes in large-scale biological consumption of O<sub>2</sub> (d) also contributed to changes in O<sub>2</sub> in low-O<sub>2</sub> equatorial zones (Buchanan and Tagliabue, 2021; Oschlies, 2021). Solubility effects dominate the top-200 meter deoxygenation while biological processes and especially ventilation changes increase their importance with depth (Schmidtko et al., 2017).

Consequences of the observed and projected deoxygenation and warming for marine species can be understood from the biogeochemical and physiological balance between pO<sub>2</sub> supply and demand, both of which depend on temperature (Pörtner and Knust, 2007; Verberk et al., 2011; Deutsch et al., 2015; Deutsch et al., 2020; Clarke et al., 2021). pO<sub>2</sub> supply to a water parcel and hence [to](#) a species is governed by a-d, while a species' O<sub>2</sub> demand (respiration) increases with temperature (Sect. 2.1).

This study uses the Aerobic Growth Index (AGI; Clarke et al., 2021) to quantify the combined effects of deoxygenation and warming on marine species in the 21<sup>st</sup> century. AGI is a species-specific ratio between pO<sub>2</sub> supply and demand and is interpreted as a measure of habitat viability. Viable habitat is characterized by a pO<sub>2</sub> supply over pO<sub>2</sub> demand ratio (i.e., AGI) sufficient for feeding, movement, defense, as well as growth and thus allows for sustainably maintaining a certain species' population (Clarke et al., 2021). Considering the ongoing deoxygenation and warming, AGI and [hence](#) habitat viability are expected to decrease (Deutsch et al., 2015; Clarke et al., 2021; Gruber et al., 2021; Oschlies, 2021). Our approach newly includes depth variability as well as temporal variability of temperature and O<sub>2</sub> in calculating AGI (Sect. 2.1), which we apply to 47 representative species thanks to the generalized temperature dependence of pO<sub>2</sub> demand in AGI (Sect. 2.2). For environmental data of temperature and pO<sub>2</sub> we use bias corrected Earth System Model projections from the latest version of the Coupled Model Intercomparison Project Phase 6 (CMIP6) (Sect. 2.3). Through this approach we assess the potential loss of viable contemporary habitat volume due to warming and deoxygenation for a representative selection of species - as well as identifying the drivers of such losses (Sect. 3).

## 90 **2 Methods and data**

### **2.1 Aerobic Growth Index**

We apply the Aerobic Growth Index (AGI; Clarke et al., 2021) to quantify species-specific impacts on habitat viability in response to changes in temperature and pO<sub>2</sub>. ~~We Therefore, we interpret AGI as a measure of habitat viability.~~ AGI integrates

95 growth theory, metabolic theory, and biogeography to calculate a theoretical ratio of  $pO_2$  supply over  $pO_2$  demand for each species  $i$  (Eq. 1; rewritten from Eq. 14 in Clarke et al., 2021).

$$AGI_i = \frac{pO_{2,i}^{supply}}{pO_{2,i}^{demand}} = \frac{pO_2^{supply}}{pO_{2,i}^{threshold} \cdot \left(\frac{W_i}{W_{\infty,i}}\right)^{1-d} \cdot \exp\left(\frac{j_2-j_1}{T^{pref}} - \frac{j_2-j_1}{T}\right)} \quad (1)$$

100 Here, the environmental state is described by  $pO_2^{supply}$  (mbar) and  $T$  as in-situ temperature (K). The variables  $j_1$  (the anabolism activation energy divided by the Boltzmann constant, 4500K),  $j_2$  (the catabolism activation energy divided by the Boltzmann constant, 8000K), and  $d$  (the metabolic scaling coefficient, 0.7) are species-independent to facilitate its application to a large number of species (Pauly, 2010; Cheung et al., 2011; Pauly and Cheung, 2018; Clarke et al., 2021). We note that the ratio between the mean species' weight  $W_i$  (g) and the species' asymptotic weight  $W_{\infty,i}$  (g),  $\frac{W_i}{W_{\infty,i}}$ , reduces to  $\frac{1}{3}$  as  $W_i = \frac{1}{3} \cdot W_{\infty,i}$  (Clarke et al., 2021).

105 We newly consider both vertical and temporal variability in  $pO_2$  and temperature in the calculation of the species'  $pO_2$  threshold ( $pO_2^{threshold}$ ; mbar) and preferred temperature ( $T^{pref}$ ; K). Critical  $pO_2$  values as well as preferred temperatures are highly species-dependent (Vaquer-Sunyer and Duarte, 2008; Pörtner and Peck, 2011; Seibel, 2011). Following Clarke et al. (2021) and Penn et al. (2018), we take  $pO_2^{threshold}$  ( $T^{pref}$ ) as the volume-weighted 10<sup>th</sup> (50<sup>th</sup>) percentile of all in-habitat  $pO_2$  (temperature) values. AGI can therefore be calculated for any species for which we have distribution data as well as environmental data for temperature and  $pO_2$ . Temporal variations in  $pO_2$  and temperature are considered by using monthly climatological mean data from the World Ocean Atlas 2018 (WOA18 average of all available decades; Boyer et al., 2018; Garcia et al., 2019; Locarnini et al., 2019; Zweng et al., 2019). The horizontal distribution data are extended over the full depth range of each [species](#) ~~(0-200m for epipelagic species, 200-1000m for mesopelagic and bathypelagic species and bottom layer of the ocean data for the demersal species, thereby covering both deep and shallow demersal habitats; see Fig. C1 and Sect. 2.3)~~ to include the vertical variability of  $O_2$  and temperature in our estimate of  $pO_2^{threshold}$ ,  $T^{pref}$  and hence AGI. [The 0-200m depth range is used for epipelagic species, 200-1000m for mesopelagic species and the bottom layer of the ocean for the demersal species, thereby covering both deep and shallow demersal habitats \(see Fig. C1 and Sect. 2.3\).](#) This approach facilitates the estimation of species-specific, temperature-dependent critical  $pO_2$  levels and  $T^{pref}$  despite the lack of observational data from multi-stressor laboratory experiments that apply to field conditions (Boyd et al., 2018; Collins et al., 2022). Different iterations of the metabolic index (Deutsch et al., 2015; Penn et al., 2018; Deutsch et al., 2020), which require laboratory-based estimates of ~~temperature-dependent~~ [temperature-dependent](#) critical  $pO_2$  levels, agree well with AGI in their assessment of habitat loss (Clarke et al., 2021) despite the much fewer data needed to calculate AGI. For additional details on the calculation of AGI we refer to Clarke et al. (2021).

125 An AGI of one implies that there is sufficient  $O_2$  supply for feeding, movement, and defence, but not growth and reproduction. To sustain a viable population, additional aerobic scope is needed until AGI is above its critical value ( $AGI^{crit}$ ) for a particular species. Following Clarke et al. (2021),  $AGI^{crit}$  is the 10<sup>th</sup> percentile of all AGI values in a species' habitat including vertical and temporal variability as done similarly for  $pO_2^{threshold}$  and  $T^{pref}$ . In this study a species is deemed impacted by changes in

temperature and  $pO_2$  whenever AGI drops below  $AGI^{crit}$  on an annual mean basis. All species information is listed in Table A1. The coarse resolution and the imperfect harmonization between the biogeographical, temperature and  $O_2$  data may affect the accuracy of the estimated  $AGI^{crit}$ , as indicated by some species having  $AGI^{crit}$ , at or below 1. We discuss in Sect. 4 how such biases may affect the results and conclusion, and how future studies can build on our results to improve the accuracy of the analysis.

Relative changes in AGI ( $AGI^{rel}$ ) between time= $t_1$  and time= $t_0$  can be estimated from Eq. 2:

$$AGI^{rel} = \frac{\Delta AGI}{AGI(t_0)} = \frac{pO_2(t_1)}{pO_2(t_0)} \cdot \exp\left((j_2 - j_1) \cdot \left(\frac{1}{T(t_1)} - \frac{1}{T(t_0)}\right)\right) - 1 \quad (2)$$

Where  $\Delta AGI$  is  $AGI(t_1) - AGI(t_0)$ . Relative changes are thus entirely species-independent (in contrast to the metabolic index of Deutsch et al., 2015) and are interpreted as relative changes in habitat viability. Eqs. 1 and 2 show that  $j_2 - j_1$  (8000-4500=3500K) modulates the influence of the temperature effect on AGI. We maintain a reference period 1995-2014 throughout this study (i.e.,  $AGI(t_0)$  is the mean AGI over the years 1995-2014). Individual contributions from  $pO_2$  and (temperature) to  $AGI^{rel}$  are calculated by keeping temperature or ( $pO_2$ ) constant at its 1995-2014 mean state when calculating  $AGI^{rel}$ .

## 2.2 Species data

AGI can be calculated for nearly a 1000 commercially exploited marine species due to the generalized temperature dependence of the  $pO_2^{demand}$ . This broad applicability of AGI allows us to select 47 representative species ( $n=47$ ), which are chosen such that depth level, climatic zone (tropical and temperate) and body size are represented. In addition, we selected some pelagic and deep-water wide-ranging species that inhabit both tropical and temperate regions, as well as the hypoxia-tolerant hypoxia-tolerant species *Dosidicus gigas*. Three depth groups are represented through our selection: Epipelagic species ( $n=23$ ) in the 0-200 meter depth range, mesopelagic/bathypelagic species ( $n=6$ ) in the 200-1000 meter depth range and demersal species ( $n=18$ ) at the sea floor (bottom wet layer of the models; Sect 2.3). The representativeness of our species selection is assessed in Sect. 3.4. Species'  $pO_2^{threshold}$ ,  $T^{pref}$  and  $AGI^{crit}$  are listed in Table A1. The contemporary species distributions are based on a gridded product from Close et al. (2006) and are assumed to represent the 1995-2014 mean state (Fig. C1).

## 2.3 Earth system model data

Environmental data of  $O_2$ , potential temperature and salinity for the years 1850-2100 are taken from the Coupled Model Intercomparison Project Phase 6 (CMIP6) multi-model ensemble (Eyring et al., 2016). Scenarios 'historical', 'SSP5-8.5' and 'SSP1-2.6' as well as the pre-industrial control simulation 'piControl' were used from the six models for which all-these environmental data were available: CNRM-ESM2-1, MPI-ESM1-2-HR, UKESM1-0-LL, IPSL-CM6A-LR, GFDL-ESM4, and CanESM5 (Appendix Table A2). All model data were horizontally regridded to a  $1^\circ$  regular grid before further post-processing.

To account for mean errors and model drift, both a drift correction and bias correction were performed. First, the bottom layer ('seafloor')  $O_2$  ocean data were linearly detrended for piControl drift over the piControl years corresponding to the scenario

years (1850 to 2100) as these trends are more than 10% of the scenario signal for some models. Drift in bottom layer temperature and salinity as well as upper water column O<sub>2</sub>, salinity and temperature were negligible as compared to the scenario signals and therefore not accounted for. Secondly, we performed a mean bias correction (e.g., Maraun, 2016) on all model data by subtracting the ‘present-day’ monthly mean climatological bias (the difference between WOA18 data vertically interpolated to the respective model levels and the respective model’s 1995-2014 monthly climatology) from the entire simulated timeseries. We used the available WOA18 climatological mean product for the sea floor data because WOA18 climatologies are only available at monthly resolution until 1500m depth. The extracted original spatial resolution of the WOA18 data is 1° for O<sub>2</sub> and 0.25° for temperature and salinity but these were all regridded to 1° to match the regridded model data grid. Note that to calculate the temperature biases, the model potential temperature was converted to in-situ temperature. Finally, *p*O<sub>2</sub> was calculated following Sect. E by Bittig et al. (2018), which is based on earlier work (Benson and Krause, 1984; Garcia and Gordon, 1992; Sarmiento and Gruber, 2006), and includes pressure correction (Taylor, 1978) and the correction for water vapor pressure (Weiss and Price, 1980) in the calculation of *p*O<sub>2</sub> (Appendix B). All results are presented at global warming levels (i.e., global mean air temperature at 2 m; e.g., Hausfather et al., 2022). In order to do so we first bias-correct modeled surface air temperatures such that the 1995-2014 global mean air temperature increase since 1850-1900 is 0.87 °C as observed (HadCRUT.5.0.1.0; Morice et al., 2021) in order to be consistent with the ~~bias-corrected~~[bias-corrected](#) ocean temperature and oxygen data. We then find the first year where the 15-year running mean of these bias-corrected global mean surface air temperature data is greater than or equal to the warming level of interest and calculate the 15-year running [mean at that year](#) over the data for the analyses. [For warming levels above 1.5°C, we only use the results for SSP5-8.5 as not all models reach warming of more than 1.5°C in SSP1-2.6.](#)

### 3 Results

#### 3.1 Global changes in warming, deoxygenation and habitat viability

Ocean temperature is projected to increase (Fig. 1a) and *p*O<sub>2</sub> to decrease (Fig. 1b) with global warming of the atmosphere. These changes occur in all three depth layers considered here, and for all CMIP6 models. Noticeably, the response of ocean warming and deoxygenation to global atmospheric warming is approximately linear (Fig. 1). From a linear fit to the [multi-model](#) mean CMIP6 changes in Fig. 1 we find that the epipelagic realm warms the most with 0.50±0.03 °C per degree of atmospheric warming (standard deviation given across the individual model fits). This signal is dampened toward depth to 0.18±0.02 °C per degree of global warming in the mesopelagic/~~bathypelagic~~ realm and 0.08±0.01 °C per degree of global warming in the demersal realm (Fig. 1a). In addition to the warming, we find that the epipelagic realm loses 0.40±0.55 mbar of *p*O<sub>2</sub>, the mesopelagic/~~bathypelagic~~ loses 1.35±0.89 mbar of *p*O<sub>2</sub> and the demersal realm loses 1.17±0.97 mbar of *p*O<sub>2</sub> on average and per degree global warming of the atmosphere (Fig. 1b). ~~hence Having the largest changes in *p*O<sub>2</sub> realized are projected~~ at depth in contrast to ocean warming. The warming ([Fig. 1a](#)) and deoxygenation ([Fig. 1b](#)) ~~drive reduce AGI relative~~

190 to its contemporary state (i.e., a negative reduction in  $AGI^{rel}$ ; Fig. 1c), which we interpret as a loss of habitat viability (Sect. 2.1; Fig. 1e) that is independent of species (Eq. 2). In the epipelagic,  $AGI^{rel}$  is decreased by  $2.17 \pm 0.69$  % per degree of global warming (Fig. 1c), while AGI decreases  $2.33 \pm 1.64$  % per degree of global warming. The global mean reduction in habitat viability (i.e.,  $AGI^{rel}$ ) in the mesopelagic/bathypelagic realm is  $2.33 \pm 1.64$  % per degree of global warming. Last, The demersal decrease in AGI loss of habitat viability is  $0.86 \pm 0.48$  % per degree of global warming, making it is the least pronounced of the three studied depth intervals. The approximately linear response of marine warming, deoxygenation, and loss of habitat viability to global atmospheric surface warming (Fig. 1) highlights and confirms that ~~an~~ any additionally realized atmospheric warming will affect the marine environment (Cheung et al., 2016).

195 The projected changes are independent of greenhouse gas emission pathway and only depend on the amount of global warming to a first degree. Nevertheless Even though our results in Fig. 1 are presented at warming levels, we here highlight that the scenario determines the a sharp contrast exists between maximum changes in temperature,  $pO_2$  and  $AGI^{rel}$  realized in scenario SSP1-2.6 and those changes of scenario SSP5-8.5; (Fig. C2): Relative to the 1850-1900 mean, global multi-model mean warming by 2081-2100 in SSP1-2.6 is limited to  $1.14 \pm 0.28$  °C in the epipelagic,  $0.62 \pm 0.07$  °C in the mesopelagic/bathypelagic and  $0.22 \pm 0.02$  °C in the demersal realm. For SSP5-8.5 the changes are approximately doubled to  $2.70 \pm 0.76$  °C,  $1.00 \pm 0.15$  °C and  $0.40 \pm 0.06$  °C of warming, respectively. Deoxygenation is also much reduced in the low-emission scenario as compared to the high-emission SSP5-8.5 scenario by 2081-2100, although model uncertainty is larger here: Global mean  $pO_2$  is reduced by at most  $0.88 \pm 1.42$  mbar in the epipelagic,  $3.23 \pm 2.96$  mbar in the mesopelagic/bathypelagic, and  $5.42 \pm 3.80$  mbar in the demersal realm for SSP1-2.6 while maximum global mean deoxygenation is projected to be stronger in SSP5-8.5 with  $2.27 \pm 2.85$  mbar,  $7.13 \pm 4.22$  mbar and  $5.61 \pm 4.23$  mbar  $pO_2$  loss respectively. The relative loss of habitat viability is 6.39 % lower in SSP1-2.6 than in SSP5-8.5 by 2081-2100 in the epipelagic ( $-11.58 \pm 4.48$  % under SSP5-8.5 vs.  $-5.18 \pm 2.08$  % under SSP1-2.6), 4.62 % lower in the mesopelagic/bathypelagic ( $-11.48 \pm 7.50$  % under SSP5-8.5 vs.  $-6.86 \pm 5.60$  % under SSP1-2.6), and 0.90 % lower in the demersal realm ( $-4.23 \pm 1.90$  % under SSP5-8.5 vs.  $-3.33 \pm 1.69$  % under SSP1-2.6).



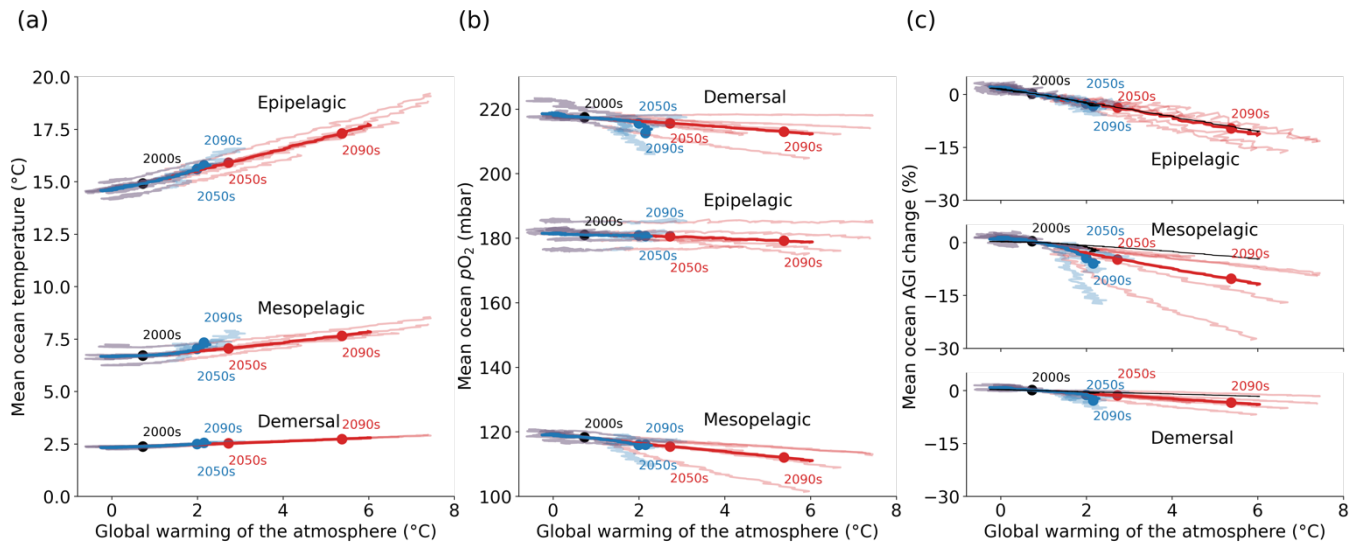

**Figure 1** Simulated global mean changes in ocean *in-situ* temperature in °C (a),  $pO_2$  in mbar (b) and  $AGI^{rel}$  in % (c) for different depth layers and global warming levels, where global warming is calculated as global surface air temperature increase relative to the 1850-1900 mean. The multi-model running mean is given in opaque blue (SSP1-2.6) and red (SSP5-8.5) and has for several decades the corresponding 20-year multi-model mean year labeled. Individual models are shown in transparent light blue and red without taking a running mean.  $AGI^{rel}$  is given relative to the 1995-2014 mean as in the remainder of the manuscript, and the mean contribution from temperature only (excluding the small effect of temperature on  $pO_2$ ) is indicated by the black line in panel (c) and calculated by keeping  $pO_2$  constant at its 1995-2014 mean state when calculating  $AGI^{rel}$ .  $AGI^{rel}$  (%) is entirely species-independent (Eq. 2) and values that exceed 1000% or are below -1000% were excluded during the calculation of the global mean  $AGI^{rel}$  changes to omit several grid-cells with extreme outliers caused by very small absolute changes in  $O_2$  causing very large changes in  $AGI^{rel}$ .

### 3.2 Local changes and drivers of habitat viability

A relative reduction in habitat viability (i.e., a reduction in  $AGI^{rel}$ ; Fig. 1c) is projected to occur almost everywhere at 2 °C of global warming (Fig. 2a-c; see Fig. C3 and C4 for 1.5 and 3 °C of global warming, respectively), indicating that for most habitats and therefore species we expect a reduction in habitat viability. The relative reduction in habitat viability is generally largest in the epipelagic and mesopelagic/bathypelagic realms (Figs. 1c, 2a, b), but the larger spatial heterogeneity at mesopelagic/bathypelagic depths reveals that locally mesopelagic/bathypelagic  $AGI^{rel}$  reductions may far exceed those in the epipelagic, particularly in the North Pacific (Fig. 2b). Hence the location of a species' habitat, both vertically and horizontally, is key to projected changes in habitat viability for a specific species. Note that the patterns in each of the panels of Fig. 2 remain similar for higher degrees of global warming, only the intensity of change increases (not shown), which agrees with the approximately linear response of the global average  $AGI^{rel}$  to global warming (Fig. 1c).

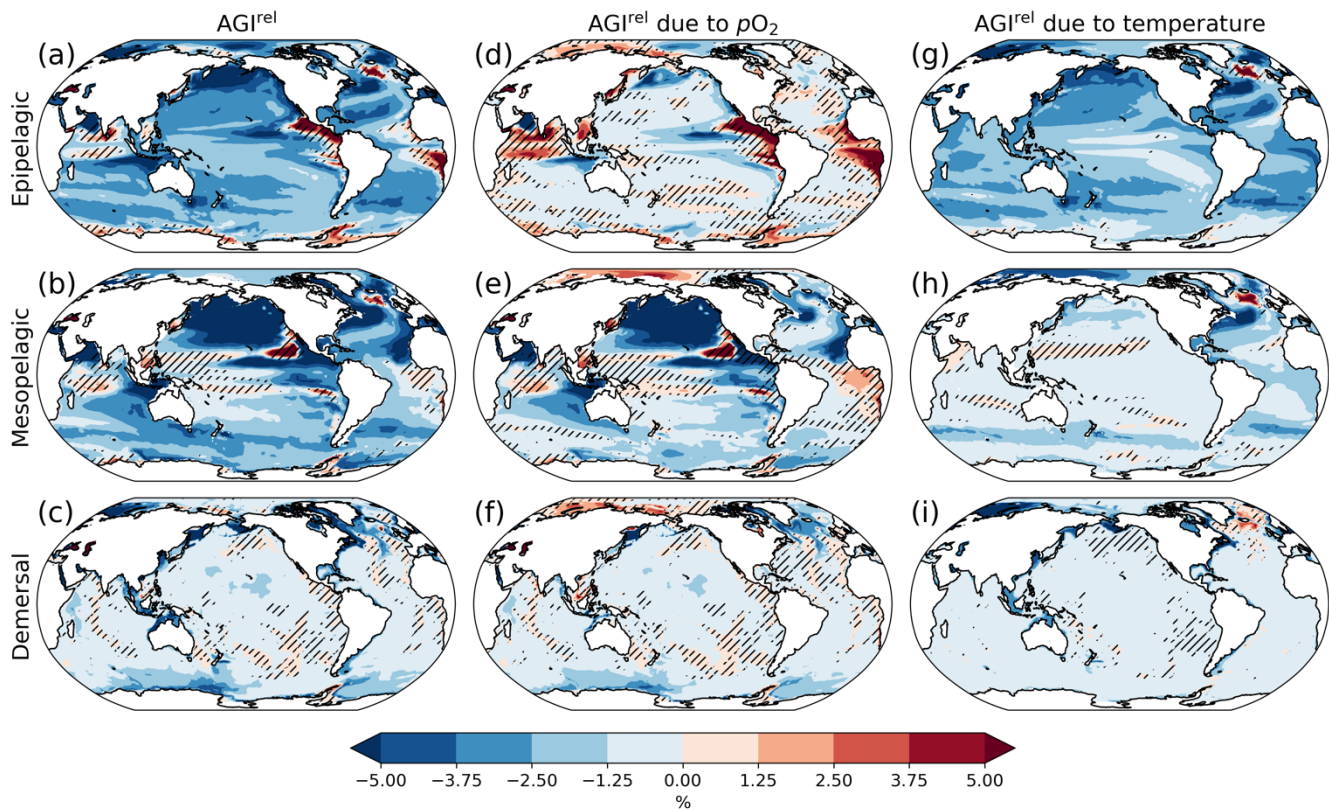

Figure 2 Multi-model mean  $AGI^{rel}$  relative to the 1995-2014 mean at 2 °C global warming (using SSP5-8.5 simulations), vertically averaged over the epipelagic and mesopelagic realms, and shown for the demersal realm (a-c).  $AGI^{rel}$  is ~~split up into the contribution divided into contributions~~ from (d-f)  $pO_2$  and (g-i) temperature. Data are hatched where more than 2 out of the 6 models disagree about the sign of change. Note that sea floor depth and thus demersal depth ~~depends depend~~ strongly on location. Contributions from  $pO_2$  (temperature) are calculated by keeping temperature ( $pO_2$ ) constant at its 1995-2014 mean state when calculating  $AGI^{rel}$ . Further note that since  $[O_2]$  depends on temperature too, the contribution to  $AGI^{rel}$  from  $pO_2$  also contains a minor temperature component.

When considering the contribution from the two drivers of AGI change,  $pO_2$  and temperature changes,  $AGI^{rel}$  ~~at 2 °C of global warming~~ is driven mostly by temperature in the epipelagic and by  $pO_2$  in the mesopelagic/bathypelagic and demersal realms (Fig. 2d-i). The  $AGI^{rel}$  ~~at 2 °C of global warming~~ due to  $pO_2$  is  $-0.16 \pm 5.12\%$  for the epipelagic,  $-2.52 \pm 6.96\%$  for the mesopelagic/bathypelagic, and  $-0.62 \pm 2.02\%$  for the demersal realm (Fig. 2d-f), while the respective  $AGI^{rel}$  due to temperature are  $-2.32 \pm 1.36\%$ ,  $-0.91 \pm 1.18\%$ , and  $-0.39 \pm 0.95\%$  (Fig. 2g-i). ~~In the mesopelagic/bathypelagic the drivers of loss in habitat viability depend more strongly on location (Fig. 2e,h). Hence, globally, on average 9487% of  $AGI^{rel}$  is on average~~ driven by the relatively pronounced warming in the epipelagic (~~black lines in Fig. 1e~~) since changes in  $pO_2$  are minor (Fig. 1b). ~~This is because~~ ~~because~~ the epipelagic realm is generally ~~well ventilated well-ventilated~~ with  $O_2$ -rich surface waters. For the mesopelagic/bathypelagic (demersal), ~~warming accounts for only 27% (39%) of the total  $AGI^{rel}$  is for only 274% (397%) explained by warming (black lines in Fig. 1e). In the mesopelagic the drivers of loss in habitat viability depend more strongly on location (Fig. 2e,h).~~ ~~Nevertheless, the~~ ~~The~~ larger contribution from  $pO_2$  to  $AGI^{rel}$  increases uncertainty for the

mesopelagic/~~bathypelagic~~ and demersal realms because model projections are uncertain for  $pO_2$  (Fig. 1b, C52). In some regions the effects of  $pO_2$  and temperature on  $AGI^{rel}$  may compensate each other and result in negligible changes in AGI. We find examples of this in the Northern Indian Ocean at epipelagic depths, in the Gulf of Guinea at mesopelagic depths, and in the North Atlantic around Iceland at demersal depths.

255

~~AGI<sup>rel</sup> is has large model uncertainty~~uncertain for species having a large part of their habitat in eastern-boundary equatorial upwelling regions or around Antarctica at epipelagic depths, the western equatorial Pacific at mesopelagic/~~bathypelagic~~ depths, north of the equator in the Indian Ocean at epipelagic and mesopelagic/~~bathypelagic~~ depths or regions scattered across all ocean basins for demersal depths (hatched areas in Fig. 2a-c). Most of this uncertainty is coming from  $pO_2$  (Fig. 2 d-f, Fig. C52), with temperature contributing to uncertainty in the North-Atlantic south of Greenland and in the western equatorial Pacific at mesopelagic/~~bathypelagic~~ depths.

260

Exceptions to the decrease in  $AGI^{rel}$  are limited to some smaller parts of the world's oceans including equatorial regions and the North-Atlantic south of Greenland in the epi- and mesopelagic/~~bathypelagic~~, and around the Antarctic continent in the epipelagic. Model disagreement is generally large in these regions of positive  $AGI^{rel}$  ~~increase~~ and is mostly attributable to projected increases in  $pO_2$  which have large uncertainties (hatching in Fig. 2a-f and model range in Fig. C52).

265

~~Notably, in some regions the effects of  $pO_2$  and temperature on  $AGI^{rel}$  may compensate each other and result in negligible changes in AGI. We find examples of this in the Northern Indian Ocean at epipelagic depths, in the Gulf of Guinea at mesopelagic/~~bathypelagic~~ depths, and in the North Atlantic around Iceland at demersal depths. Note that the patterns in each of the panels of Fig. 2 remain similar for higher degrees of global warming, only the intensity of change increases (not shown), which agrees with the approximately linear response of  $AGI^{rel}$  to global warming (Fig. 1c).~~

270

Besides considering the model uncertainty, we performed a sensitivity analysis of  $AGI^{rel}$  to the choice of generalized temperature dependence parameters (i.e.,  $j_2-j_1$ ). If  $j_2-j_1$  is adjusted to represent low temperature sensitivity of 1000K, global mean  $AGI^{rel}$  is 34% of the standard case  $j_2-j_1=3500K$  in the epipelagic, 67% in the mesopelagic and 73% in the demersal realm. On the other hand, for high temperature sensitivity ( $j_2-j_1=6000K$ ), global mean  $AGI^{rel}$  is 165% of the standard case  $j_2-j_1=3500K$  in the epipelagic, 118% in the mesopelagic and 126% in the demersal realm. Projections for epipelagic species are therefore most sensitive to the choice of  $j_2-j_1$ , as temperature changes are largest there. Further work is needed to explore the uncertainty in  $j_2$  and  $j_1$ .

275

### 3.3 Impacts of AGI changes on habitat volume of individual species

The overall ~~decrease~~~~negative~~in  $AGI^{rel}$  and hence relative loss of habitat viability with global warming (Figs. 1c and 2) causes loss of contemporary habitat volume (i.e., newly exposed volume with  $AGI < AGI^{crit}$ ) ~~and hence local extinction~~ for species at each of the studied depth ranges (Figs. 3 and 4). Habitat loss is expressed relative to its contemporary volume (Fig. 3) to facilitate comparison between wide-ranging and more narrowly distributed species. Loss of contemporary habitat is generally less than ~~-150%~~ at 2+5°C global warming, and mostly under 5%, but increases to up to ~25% for individual species at 3°C

280

(Fig. 3). Wide-ranging epipelagic species (e.g., *Acanthocybium solandri*, *Coryphaena hippurus*, *Katsuwonus pelamis*, *Thunnus*  
285 *obesus*, or *Elagatis bipinnulata*; Fig. C1) experience losses of contemporary habitat volume of less than 5% for any of the  
analyzed warming levels, while more narrowly distributed species experience the largest losses of up to ~25% of their  
contemporary habitat at 3°C global warming (e.g., *Micromesistius poutassou*, *Thunnus atlanticus*, *Sebastes mentella*, or  
*Anarhichas denticulatus*). Notably, species that have the largest contemporary habitat loss at 1.5°C generally are those species  
that also lose the most at 3°C of global warming, which is in line with the earlier findings of approximately linear response of  
290 [relative changes in](#) habitat viability to warming and deoxygenation (Fig. 1). Any early (i.e., 1.5°C) response of a species to  
warming and deoxygenation is therefore a warning indicator for additional loss of contemporary habitat at increased levels of  
global warming.

We separately assess the impact of the uncertainty of  $AGI^{crit}$  on these results by calculating habitat loss with an  $AGI^{crit}$  of a)  
minimum AGI, b) 5<sup>th</sup> percentile, c) 10<sup>th</sup> percentile (i.e., the default case), d) 15<sup>th</sup> percentile and e) 20<sup>th</sup> percentile of in-habitat  
295 AGI. We find that even when including much higher thresholds ( $AGI^{crit}$  as 20<sup>th</sup> percentile), our results are similar with a few  
species having large losses but most losing less than 5% at 2°C of warming relative to the 1995-2014 state (Fig. C6).  
[Moreover, a sensitivity analysis for species \*Thunnus atlanticus\* and \*Gadus morhua\* shows that our median result is robust to  
the choice of the generalized temperature dependence parameters  \$j\_2-j\_1 \pm -71\%\$ ; Fig. C7\).](#)

Absolute losses in habitat volume ([i.e., loss expressed in volumetric terms instead of a percentage](#)) show that small relative  
300 losses (Fig. 3) often correspond to the largest volumetric losses (Fig. 4). As an example, median *Thunnus alalunga* habitat loss  
is less than ~2.5% at any of the analyzed warming levels (Fig. 3), while absolute losses are the largest of all 47 species [at  
ranging from](#)  $-0.25$  to  $-1.5e^6$  km<sup>3</sup> - depending on [the](#) global warming level (Fig. 4). On the other hand, we find species like  
*Sebastes mentella* for which relative losses are large (median  $-8-26\%$  of the contemporary habitat depending on global  
warming level; Fig. 3) while absolute losses are comparably small ( $-0.6-1.8e^5$  km<sup>3</sup>) because the contemporary volume of  
305 *Sebastes mentella* is relatively small (Fig. 4). Note that epipelagic species lose habitat volume in the order of a million km<sup>3</sup>.  
In comparison, the entire Black Sea has a volume of about 0.5 million km<sup>3</sup>. Depending on the location of viable contemporary  
habitat loss, for species of commercial interest such large absolute loss can be particularly impactful to local fisheries.

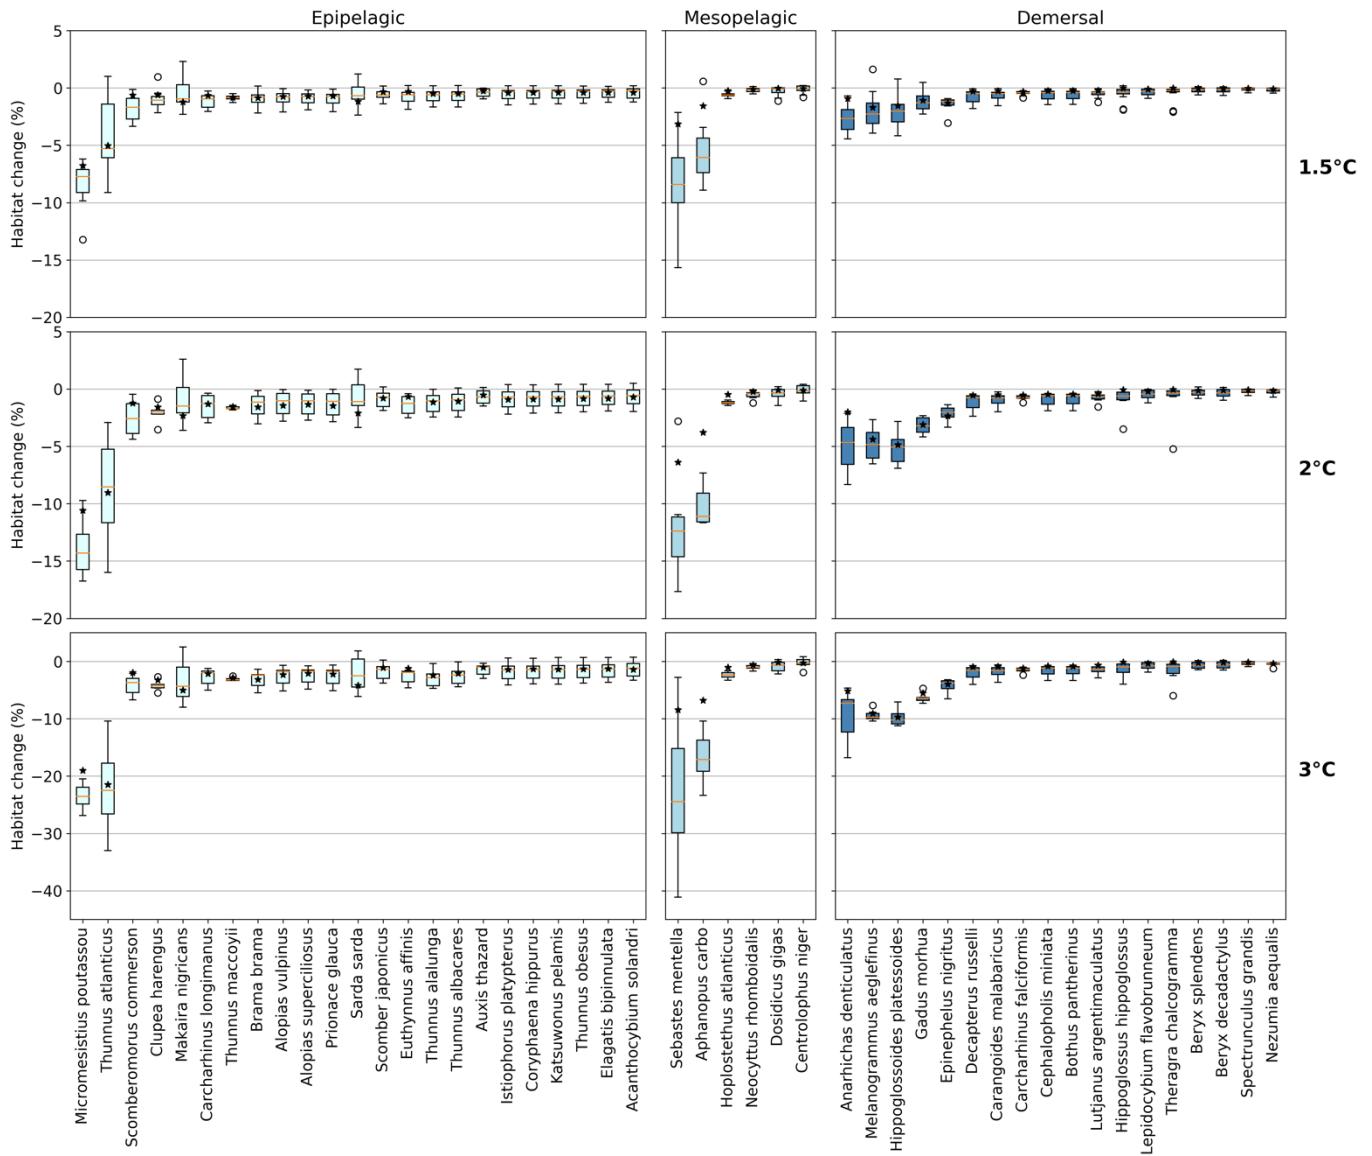

310 **Figure 3** Percentage of remaining Habitat change (%) of contemporary (1995-2014) habitat volume for different levels of global warming, with negative values indicating habitat loss and positive values indicating habitat gain. Note the different y-axis scale for  
 315 **3°C global warming.** Habitat volume is considered lost when  $AGI < AGI^{crit}$  on an annual mean basis. For 1.5°C global warming both the SSP1-2.6 and SSP5-8.5 scenarios are included (number of datapoints  $n=2$  scenarios  $\times$  6 models = 12 for each boxplot), while at higher levels of global warming we use SSP5-8.5 as not all models reach these warming levels under the SSP1-2.6 scenario ( $n=6$  models). The species are ordered such that species with the largest median losses at 1.5°C global warming are on the left-hand side for each realm subplot. Each boxplot indicates the median in orange and a box bounded by the interquartile range (IQR; the 25<sup>th</sup> to 75<sup>th</sup> percentiles) and the whiskers extending to the data range with a maximum of  $1.5 \times IQR$ , with outliers as open circles. Stars indicate the median contribution from temperature, the remainder is therefore due to  $pO_2$  changes. As changes are expressed relative to the contemporary viable habitat volume (which is by definition 90% of the total habitat volume), values up to  $10 \pm 1\%$  ( $=100 \pm 90$ ) are possible.

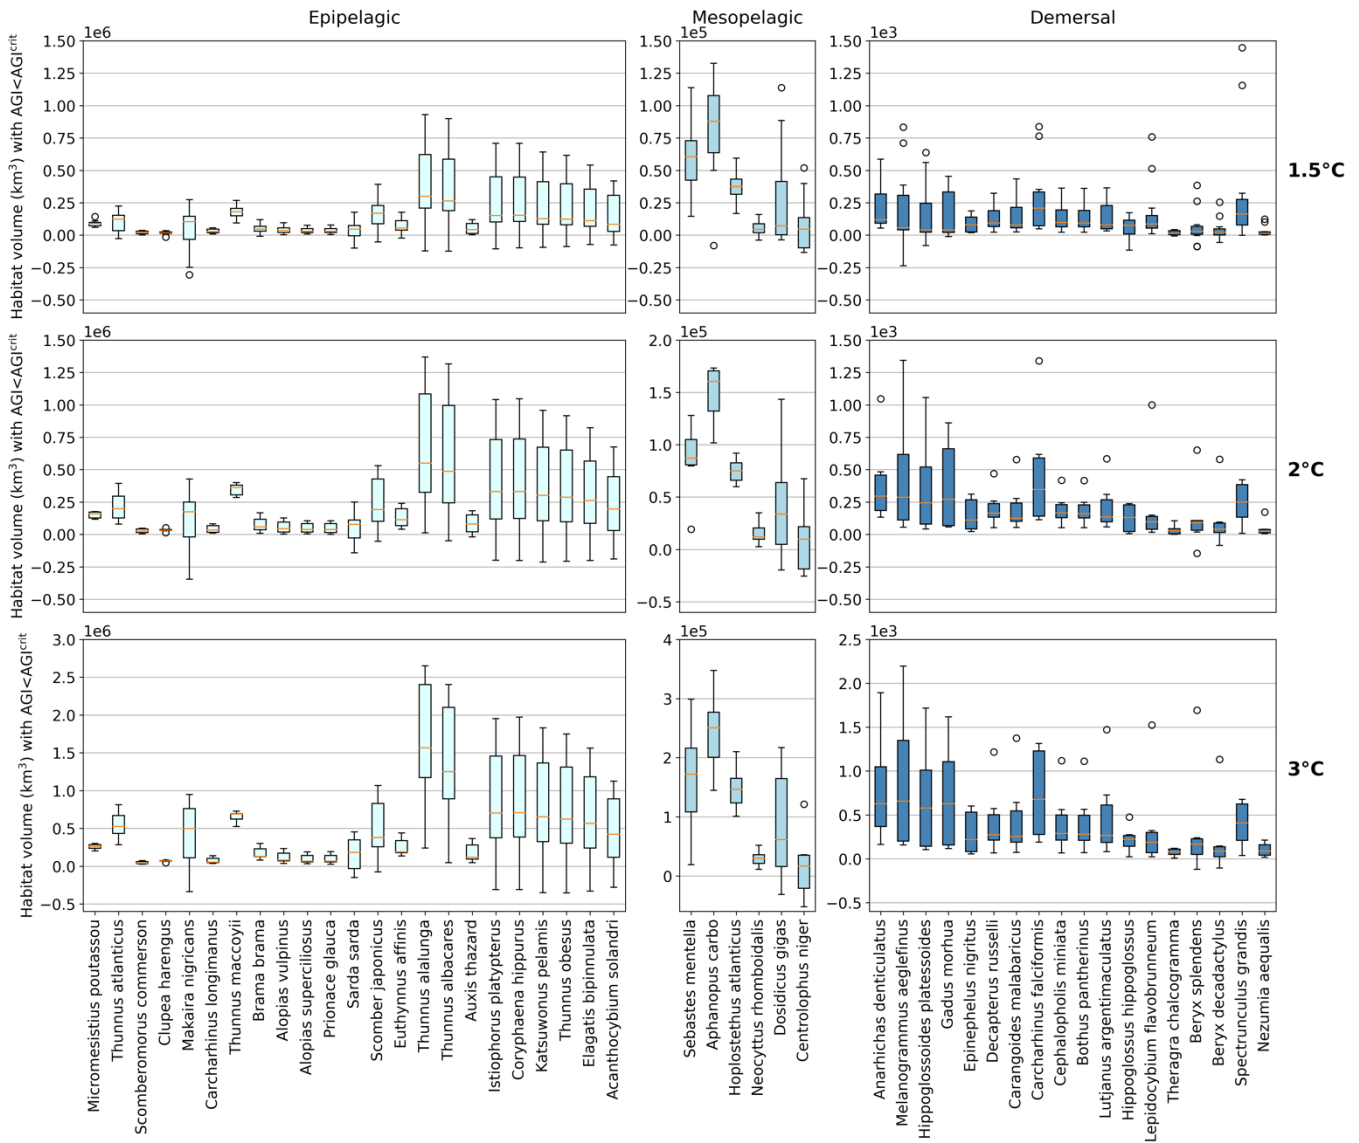

320 **Figure 4** Contemporary habitat loss ( $\text{km}^3$ ) for different levels of global warming. Note the different y-axes for both the depth groups and warming levels. Habitat volume is considered lost when  $\text{AGI} < \text{AGI}^{\text{crit}}$  on an annual mean basis. For  $1.5^\circ\text{C}$  global warming both the SSP1-2.6 and SSP5-8.5 scenarios are included (number of datapoints  $n=2$  scenarios  $\times$  6 models = 12 for each boxplot), while at higher levels of global warming we use SSP5-8.5 as not all models reach these warming levels under the SSP1-2.6 scenario ( $n=6$  models). Species are ordered **in the same order** as in Fig. 3. Each boxplot indicates the median in orange and a box bounded by the interquartile range (IQR; the 25<sup>th</sup> to 75<sup>th</sup> percentiles) and the whiskers extending to the data range with a maximum of  $1.5 \times \text{IQR}$ , with outliers as open circles.

325 For most species, temperature is the main driver of habitat loss (black stars in Fig. 3). Exceptions exist for example in the mesopelagic/bathypelagic, where  $p\text{O}_2$  drives about half of the habitat loss for the two species with the largest loss (i.e., *Sebastes*  
 330 *mentella* and *Aphanopus carbo*) as well as for the demersal species *Anarhichas denticulatus*. Even though most of the realized loss can be explained by warming, not all species have large losses despite warming being relatively uniform although

dampened toward depth (Kwiatkowski et al., 2020). ~~We understand T~~ these differences ~~can be explained from by considering~~ the original spatial and temporal  $pO_2$  and temperature variability in each species' habitat, which shapes their vulnerability to change. ~~This is investigated next. (Sect. 3.4).~~

### 335 3.4 Drivers of habitat volume loss of individual species

The differences in habitat loss between species as shown in Figs. 3 or 4 are better understood from the probability density of ~~contemporary (1995-2014) in-habitat~~ AGI for each species (~~conceptual~~ Fig. 5 and ~~species results in Fig. C84~~). The spatial variability of ~~the contemporary~~  $pO_2$  and temperature in each species' habitat results in a species-specific probability density function (PDF) for AGI (~~black lines in~~ Fig. 5a,b). Depending on this shape, a given reduction in AGI ( $\Delta AGI$ ) exposes a relatively large or small part of the species' habitat to subcritical AGI values (~~red lines and stippling in~~ Fig. 5a,b), ~~thereby causing volume loss~~. ~~We can quantify this "vulnerability" of a species to changes in AGI by calculating the cumulative sum of the PDFs (i.e., the cumulative density function, CDF, Figs. 5c,d and C5).~~

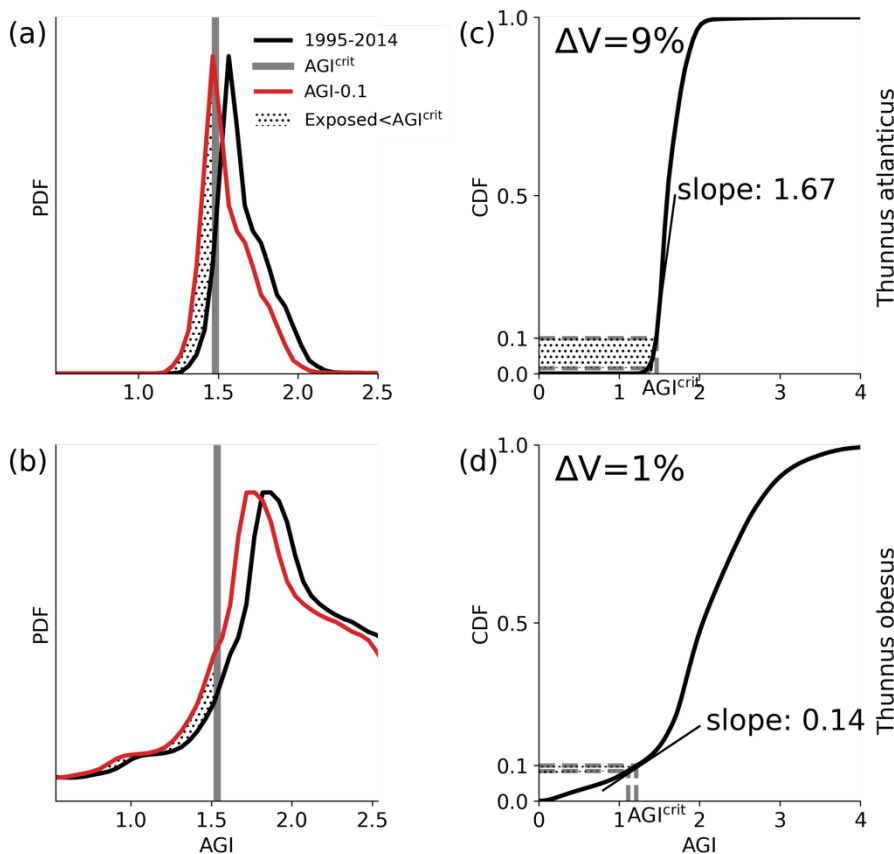

345 **Figure 5** Conceptual figure based on *Thunnus atlanticus* (a,c) and *Thunnus obesus* (b,d) showing the difference in impact (change in volume  $\Delta V$ ) of an example mean AGI reduction of  $\Delta AGI$  of 0.1 (i.e., habitat-mean  $\Delta AGI=0.1$ ) below the 1995-2014 contemporary mean (black lines). This difference is shown to be related to the shape of the PDF and the slope of the CDF at 0.1 (i.e., at AGI<sup>crit</sup>), which we refer to as the species' "vulnerability".

We can quantify the “vulnerability” of a species to changes in AGI by calculating the cumulative sum of the PDFs (i.e., the cumulative density function; CDF; conceptual Figs. 5c,d and species-specific results in C9§). The slope of the CDF at a cumulative density of 0.1 (i.e., 10% of the volume where  $AGI^{crit}$  is defined) indicates the potential loss in habitat for a certain change in AGI (Fig. 5 and C9§). If the slope of the CDF is steep at the critical threshold, the species is relatively vulnerable to warming and deoxygenation as: Only a small reduction in habitat viability (i.e., AGI) will push a relatively large volume below the critical threshold. An example is given in Fig. 5, where for an identical change in mean in-habitat  $\Delta AGI$  of 0.1 just 1% of the volume is pushed below  $AGI^{crit}$  for a species with a small slope of 0.14 (Fig. 5b,d, ‘*Thunnus obesus*’ schematic), while the same change in AGI results in 9% volume loss for a species with a large slope of 1.67 (Fig. 5a,c, ‘*Thunnus atlanticus*’ schematic). Changes in the slope of some species’ CDFs indicates that different vulnerabilities exist for different parts of that species’ habitat (Fig. C9). Hence, in habitat areas which that are represented by a part of the CDF with a relatively steep slope, a relatively small change in AGI is needed to bring a relatively large volume closer to  $AGI^{crit}$ . Nevertheless, only the CDF slope at  $AGI^{crit}$  relates directly to viable habitat volume loss as only AGI values below  $AGI^{crit}$  are considered to have an impact on habitat volume.

Indeed, projected habitat volume loss increases with species’ vulnerability (i.e., the CDF slope at  $AGI^{crit}$ ; Fig. 6d), as well as to a lesser extent with warming and deoxygenation (Fig. 6b,c). Notably, the largest absolute reductions of mean in-habitat AGI do not indicate those species who lose most contemporary habitat volume (Fig. 6a). On the contrary, the environmental state of the contemporary habitat as captured in the PDFs and thus the slope of the CDFs and vulnerability is the strongest indicator for impact: 87% of the variance in volume loss at 2 °C global warming can be explained by vulnerability ( $R^2$  of linear fit in Fig. 6d). This result holds across different levels of global warming: At 1.5°C of global warming, 85% of the variance in volume loss can be explained by vulnerability, and at 3°C of global warming this is 88% (see Figs. C10 and C11). The correspondent linear equation taken across all depth realms is  $volume\ loss\ (\%) = 7.31 * vulnerability - 0.10$ .

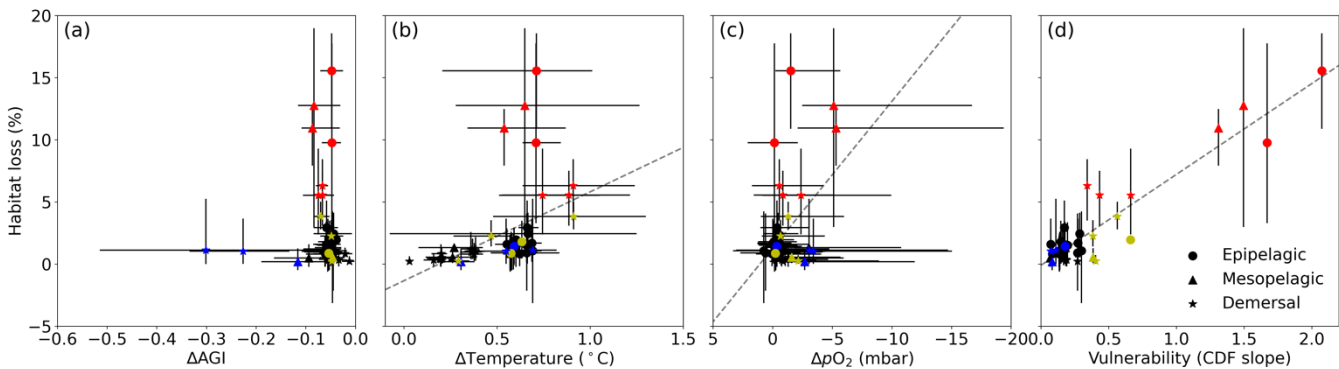

**Figure 6** Multi-model mean in-habitat changes at 2°C of global warming of (a) AGI, (b) temperature, (c)  $pO_2$  (in SSP5-8.5) and (d) vulnerability (CDF slope at a cumulative density of 0.1 based on 1995-2014 mean data, Fig. C9) plotted against loss of contemporary habitat volume for each species (model range indicated by error bars). Species with > 5% loss marked in red, more than  $-0.1 \Delta AGI$  in blue, and volume loss < 5% as well as vulnerability > 0.3 in yellow. There is no uncertainty in the vulnerability calculation because all models have the same 1995-2014 CDF slope due to the WOA18 bias-correction. From a linear regression to the data which is plotted in dashed grey we find an  $R^2$  of 0.0% for (a) which line is therefore not plotted, 18% for (b), 21% for (c) and 87% for (d).



Habitat viability ~~thus~~ strongly depends on the variability of temperature and O<sub>2</sub> in the habitat of the species as captured by the species' vulnerability (Figs. C95 and 6d). Therefore, reports of relative losses in habitat viability based on pO<sub>2</sub> supply over pO<sub>2</sub> demand ratios (e.g., Deutsch et al., 2015; Oschlies, 2021) should not be interpreted as leading to actual reductions of viable habitat for individual species as they do not include species-specific thresholds nor their vulnerabilities.

We highlight three groups of species for further discussion of the results at 2°C of global warming: (1) The most affected and vulnerable species due to high vulnerability despite small ΔAGI (red markers in Fig. 6): *Micromesistius poutassou*, *Thunnus atlanticus*, *Sebastes mentella*, *Aphanopus carbo*, *Anarhichas denticulatus*, *Melanogrammus aeglefinus* and *Hippoglossoides platessoides*, (2) the resilient species which have low losses despite high ΔAGI due to low vulnerability (blue markers in Fig. 6): *Centrolophus niger*, *Hippoglossus hippoglossus* and *Theragra chalcogramma*, and (3) the vulnerable, but not affected species who lose <5% of their habitat volume due to small ΔAGI despite relatively high vulnerability (yellow markers in Fig. 6): *Clupea harengus*, *Thunnus maccoyii*, *Neocyttus rhomboidalis*, *Epinephelus nigritus*, *Gadus morhua* and *Nezumia aequalis*. Considering the range captured in Fig. 6a-d we expect that our selection of species is representative of a wide range of marine ectotherms.

Interestingly, species with high vulnerability and loss (red markers in Fig. 6) all have a high pO<sub>2</sub><sup>threshold</sup> above 150 mbar (Table A1, Fig. C126). Thus, even though warming explains most of the loss of contemporary habitat (~~black stars in Fig. 3~~), loss is only high for vulnerable species (Fig. 6d) – which in turn all are sensitive to pO<sub>2</sub> as evidenced by their pO<sub>2</sub><sup>threshold</sup> above ~150 mbar (Fig. C126). A high sensitivity to pO<sub>2</sub> and hence a high pO<sub>2</sub><sup>threshold</sup> is therefore an indicator of vulnerability, although not all species with high pO<sub>2</sub><sup>threshold</sup> are vulnerable (Fig. C126). The high vulnerability for species with a high pO<sub>2</sub><sup>threshold</sup> shows that also species in well-oxygenated regions can be vulnerable to climate change as their natural pO<sub>2</sub> range is limited. We further note that vulnerability does not depend on the depth realm of a species. Resilient species (blue markers in Fig. 6) have strong spatiotemporal variability of AGI (broad PDF in Fig. C84) such that even large mean changes of AGI (Fig. 6a) do not expose a large volume to subcritical AGI values. Noticeable is that the two species with a PDF skewed to the right (Fig. C8; *Hippoglossus hippoglossus* and *Theragra chalcogramma*) are both in this group, while all other species tend to have a left-skewed PDF of AGI values in their habitat. These two species are both demersal-dwelling and are very pO<sub>2</sub> tolerant (i.e., low pO<sub>2</sub><sup>threshold</sup>; Table A1) and have a wide range of different AGI values in their habitat, with a relatively large volume of high-AGI values causing the right skew (Fig. C8) and resilience (Fig. C12). Whether AGI is the right metric for determining habitat viability for these two species needs further investigation that goes beyond the scope of this study. The six species with relatively high vulnerability but small habitat volume loss (yellow markers in Fig. 6) experience relatively small AGI changes in their habitats even at 3°C global warming (Fig. C84) thereby preventing large habitat losses.

#### 4 Discussion

We introduce a new version of AGI that adds vertical temporal variability in the calculation of pO<sub>2</sub><sup>threshold</sup>, *T<sub>pref</sub>*, and AGI<sup>crit</sup> – which makes it possible to assess volumetric habitat changes. The original AGI applies and assesses temporal variability in

the horizontal ~~(surface or bottom ocean layers for pelagic and demersal species, respectively)~~ direction only ([surface or bottom ocean layers for pelagic and demersal species, respectively](#); Clarke et al., 2021), as commonly practiced (e.g., Bryndum-Buchholz et al., 2019; Tittensor et al., 2021). ~~In other words, e, i.e.,~~ either surface or sea floor data were applied for the calculation of  $pO_2^{\text{threshold}}$ ,  $T^{\text{pref}}$ ,  $AGI^{\text{crit}}$  and hence  $AGI$  [in earlier work](#). To assess the differences between our new approach and  
410 the original approach we repeated the analysis as presented in Fig. 3, ~~(Fig. C137)~~, now using surface ocean data only for mesopelagic ~~bathypelagic~~ and epipelagic species as well as calculating  $pO_2^{\text{threshold}}$ ,  $T^{\text{pref}}$ ,  $AGI^{\text{crit}}$  from the surface monthly mean WOA18 data only [\(Fig. C13\)](#). We find that the sensitivity to global warming of all species is higher for the original  $AGI$  as compared to our new approach which includes vertical and seasonal variability of temperature and  $pO_2$ . This is understood from the combination of a) limited spatial variability of surface ocean  $pO_2$  as well as temperature, leading to higher  $T^{\text{pref}}$  and  
415  $pO_2^{\text{threshold}}$  estimates and therefore stronger sensitivity to warming and deoxygenation as compared to our new approach and b) larger  $AGI^{\text{rel}}$  changes closer to the surface. We expect that including temporal and vertical spatial variability in calculating  $AGI$  provides a more realistic estimate of the  $pO_2$  and temperature variability experienced by a species and therefore a better estimate of its sensitivity to warming and deoxygenation. Nevertheless, we acknowledge that further increasing spatiotemporal resolution (e.g., using daily-mean data and including interannual variability) ~~can~~ [may increase](#) ~~affect~~ variability (Deser et al.,  
420 2009; Baumann et al., 2015) which can affect estimates of  $T^{\text{pref}}$ ,  $pO_2^{\text{threshold}}$  and  $AGI^{\text{crit}}$ . Unfortunately, no established theory exists yet to decide what temporal variability in environmental parameters best captures species'  $T^{\text{pref}}$ ,  $pO_2^{\text{threshold}}$  or  $AGI^{\text{crit}}$ . By considering WOA18 monthly mean climatological data as the basis for our estimates of  $T^{\text{pref}}$ ,  $pO_2^{\text{threshold}}$  and  $AGI^{\text{crit}}$ , we are consistent with the time resolution of the CMIP6 model data (monthly mean).

~~R~~ [Further](#), regarding the choice of the 10<sup>th</sup> percentile threshold and impact of its uncertainty on our results (Fig. C63), we  
425 consider an  $AGI^{\text{crit}}$  threshold above the 20<sup>th</sup> percentile of in-habitat  $AGI$  values unlikely as then by definition already 20 percent of the habitat would be unsuitable to sustain a viable population of that species. Nevertheless, for species where  $AGI^{\text{crit}}$  is very close to 1 or even below 1 (Table A1), a higher percentile may be warranted as a meaningful critical value. At the 10<sup>th</sup> percentile, some uncertainty in the species-specific physiological parameters is considered. We find for most species that the 10<sup>th</sup> percentile is located at an  $AGI$  above which habitat volume steeply increases suggesting it acts as an appropriate threshold  
430 (Fig. C84).

Regarding species' data, we assume that our results can be generalized to commercial fish and invertebrates worldwide, as they are based on representative species from different climatic zones (tropical, temperate, polar), vertical habitat (epipelagic, mesopelagic, ~~bathypelagic~~, demersal), geographic range breadths, taxonomic groups (fish and invertebrates) and size classes. Species distribution ranges were generated by an algorithm developed by the Sea Around Us [project](#) (see Close et al., 2006;  
435 Cheung et al., 2008). The resulting distributions, and the parameters used for their construction are available at <http://www.seaaroundus.org>. These distributions have been used to project climate-impacts on fishery resources in a great number of studies (Cheung et al., 2009; Cheung et al., 2010; Fernandes et al., 2013), and are assumed to represent species distributions ~~in~~ [over the period](#) 1995-2014 (Tai et al., 2021). Our assumption to extend the 2D distributions provided by Close et al. (2006) over the entire depth range of each species' depth realm is driven by data sparsity and reliability of 3D species distributions

440 for our selection of species. When reliable 3D habitats, or even time-varying habitats, can be constructed from species' observations these could be included (e.g., distribution data are continuously collected in the Ocean Biodiversity Information System but are currently ~~are~~ too sparse to provide 3D distribution data). Some species may be limited to only part of their assigned depth range or live partly (and possibly temporarily) above or below it. Nevertheless, we expect that the assigned depth range generally provides a good estimate of in-habitat  $pO_2$  and temperature variability, which affects  $pO_2^{\text{threshold}}$ ,  $T^{\text{pref}}$  and therefore AGI and AGI<sup>crit</sup>.

445 Our results for the mesopelagic include two vertical migrators (*Dosidicus gigas* and *Aphanopus carbo*). As opposed to most other species, the distribution range of vertical migrators is limited at the cold boundary of the distribution because of their low aerobic scope in cold waters (Seibel and Birk, 2022). Therefore, the temperature sensitivity of these species is likely not captured by the generalized temperature dependence in AGI, and contemporary habitat loss due to warming and deoxygenation as estimated for *Aphanopus carbo* is likely overestimated. We nevertheless project negligible loss of contemporary habitat for *Dosidicus gigas* (Fig. 3) due to its low vulnerability and low  $pO_2^{\text{threshold}}$ , which is in good agreement with the findings of Seibel and Birk (2022) despite the generalized temperature dependence of AGI. ~~In addition,~~ species-specific thresholds  $pO_2^{\text{threshold}}$  and AGI<sup>crit</sup> and preference  $T^{\text{pref}}$  are calculated based on the in-habitat spatiotemporal variability of  $pO_2$ , temperature and AGI respectively. This is done in lack of observation-based thresholds and preferences that translate to field conditions (Boyd et al., 2018; Collins et al., 2022). Detrimental effects from deoxygenation such as reduced vision as visual hypoxia actually become relevant at much higher  $pO_2$  than (near) lethal  $pO_2$  levels (McCormick and Levin, 2017), while only the latter is often what is assessed in the lab. As an effect, the exact threshold of impact remains unknown and probably depends on many factors including the impact itself, and the abruptness, magnitude, intensity, duration, heterogeneity and recurrence of exposure to subcritical values (Gruber et al., 2021), as well as timing of and adaptability to unfavorable temperatures, subcritical  $pO_2$  and hence subcritical AGI.

460 Through the bias correction of the CMIP6 model data all monthly mean biases relative to WOA18 are removed from our analysis. We acknowledge the influence of observational uncertainties as well as resolution mismatch between our model and the observational WOA18 data used in our bias correction (Casanueva et al., 2020). More complex bias adjustment such as correction for variance biases is prevented by the spatial and temporal resolution of the model and observation data at the global scale. The ongoing effort to collect, compile, and quality-control  $O_2$  data in open-access repositories (e.g., Grégoire et al., 2021) will hopefully make it possible to do more advanced bias correction in the future. Until that time the strong temporal variability and spatial heterogeneity of  $O_2$  trends complicate the comparison between model and observational data. Nevertheless, the remaining forced response of the models likely underestimates deoxygenation (Andrews et al., 2013; Oschlies et al., 2017; Oschlies et al., 2018; Buchanan and Tagliabue, 2021) and overestimates atmospheric warming (Tokarska et al., 2020) and therefore ocean warming for some CMIP6 models. Part of these warming biases are due to the relatively high climate sensitivities in the CMIP6 models (Meehl et al., 2020). As a further measure to limit model uncertainty, we therefore present results at different global warming levels such that they are insensitive to the differences in model climate sensitivity (Hausfather et al., 2022). We last acknowledge the relatively coarse resolution of the CMIP6 data (typically ca. 100km in the

ocean) which for species with a highly local distribution (Fig. C1) may lead to higher model uncertainties, especially along the  
475 coasts where model disagreement is larger (Fig. C52).

Our approach may give a conservative estimate of contemporary habitat loss since a) crossings of the critical thresholds on  
timescales shorter than a year are excluded from our analysis, b) CMIP6 projections likely underestimate deoxygenation  
(Andrews et al., 2013; Oschlies et al., 2017; Oschlies et al., 2018; Buchanan and Tagliabue, 2021), but considering the  
importance of temperature in driving habitat loss (Fig. 3), especially in the epipelagic realm, the uncertainty of  $pO_2$  projections  
480 likely has a relatively small effect on our results, and c) we do not include other potential stressors [on species' habitats](#) in our  
analysis such as acidification, changes in ecosystem structure, overfishing, [marine phenology](#), [disease pressure](#), [food resources](#),  
[predation pressure](#), [pollution](#) or eutrophication (e.g.; Poloczanska et al., 2016; Bindoff et al., 2019; Whalen et al., 2020).  
Examples of crossings of the critical thresholds on timescales shorter than a year would be short hypoxic events and marine  
heatwaves (Frölicher and Laufkötter, 2018; Jacox et al., 2020; Cheung et al., 2021). Projected deoxygenation and particularly  
485 hypoxic or anoxic events have the potential to worsen and even surpass the effects of warming, marine heatwaves, and  
acidification (Gruber et al., 2021; Sampaio et al., 2021).

On the other hand, for some species the impact will be overestimated if they are able to adapt to future warming and  
deoxygenation (Cheung et al., 2009; Pinsky et al., 2013; García-Molinos et al., 2016; Palumbi et al., 2019; Collins et al., 2021;  
Liao et al., 2021). Further note that we considered [potential](#) loss of contemporary habitat only: Mobile species have been  
490 observed to redistribute based on the rate and direction of climate change (Pinsky et al., 2013) which can preserve the species  
range area if they are able to expand into newly suitable areas - however this can alter the original ecosystem structure and  
function.

For most species we find a loss of habitat volume of less than 10%. It is found for example by Gotelli et al. (2021) that only a  
small percentage of species drives the observed changes in marine species assemblages, showing that even when only a few  
species experience large losses, impacts can be profound for the ~~ecosystem as a whole~~. For the individual species however,  
the loss of only a small fraction of their [contemporary](#) habitat likely provides adaptation opportunities. [Our results imply that  
species that are deemed vulnerable due to their limited range of in-habitat  \$pO\_2\$  and temperature are likely to be the most  
impacted by global warming \(i.e., 'vulnerable species' in Fig. 6 and species with steep CDF slopes in Fig. C9\). Our study can  
therefore inform e.g., fisheries management by identifying species particularly vulnerable to ocean warming and  
deoxygenation. Such identification provides species-specific information complementing earlier studies that found reduced  
500 impact on fisheries at lower levels of global warming \(Cheung et al., 2016\). ~~Indeed, for every tenth of a degree of any additional  
global warming, our study shows increased marine deoxygenation and warming as well as increased loss of contemporary  
habitat across all species albeit with a strongly species-specific magnitude. These results confirm the need to limit global  
warming levels to the minimum to prevent loss of contemporary habitat and support the identification of the species that would  
505 be most vulnerable to marine deoxygenation and warming.~~](#)

## 5 Conclusions

- Marine warming and deoxygenation are projected to intensify with global warming and drive a [relative](#) decrease in global habitat viability penetrating to all depths (Fig. 1 and 2).
- The [generally negative](#) relative [decreasechanges](#) in habitat viability (i.e.,  $AGI^{rel}$ ) [are](#) dominated by warming at the surface while deoxygenation becomes increasingly important with depth (Fig. 2).
- Loss of contemporary habitat is driven mostly by warming in the epipelagic realm, while in the mesopelagic/[bathypelagic](#) and demersal realms reduced  $pO_2$  is also contributing for some species (Fig. 3).
- [Deoxygenation and warming cause most species to lose less than 5% of their contemporary habitat volume over the 21<sup>st</sup> century relative to preindustrial \(Fig. 3\). Some individual species are however projected to incur losses 2-3 times greater than that at 1.5 and 2 °C of global warming and 4-5 times greater at 3°C of global warming. At 2 °C of global warming, epipelagic losses are generally in the order of 0.1-0.5 million km<sup>3</sup>, while mesopelagic losses are 0.01-0.15 million km<sup>3</sup> and demersal losses are in the order of about 0.00025 million km<sup>3</sup>.](#)
- The impact of [reductionsnegative relative changes](#) in habitat viability (i.e.,  $AGI^{rel}$ : Figs. 1c and 2) on lost habitat volume (Figs. 3 and 4) depends on species' vulnerability (Figs. 5, 6d, [C95](#)).
- Species' vulnerability is shown to be the most important indicator for [potential](#) large (>5%) [potential](#) habitat losses - not relative or absolute changes in AGI,  $pO_2$  or temperature (Fig. 6). A species'  $pO_2^{threshold}$  above 150 mbar is an indicator for high species vulnerability to warming (Fig. [C126](#)). [Our approach of quantifying vulnerability can help identify those species most vulnerable to marine warming and deoxygenation.](#)
- We introduce an updated version of  $AGI_{\tau}$ . By including temporal and vertical spatial variability in the calculation of the species-specific  $O_2$  thresholds and temperature preference, we include a more realistic representation of the in-habitat variability of  $O_2$  and temperature and therefore likely the species' tolerance to these. The updated AGI has lower sensitivity than in the original AGI of Clarke et al. (2021) (Figs. 3 and [C137](#)).

## Appendix A Tables

**Table A1 Species information, ordered alphabetically by species name. Group 1 is epipelagic; group 2 is mesopelagic/[bathypelagic](#), and group 3 is demersal.  $pO_2^{threshold}$  (mbar),  $T_{pref}$  (°C) and  $AGI^{crit}$  (-) are based on the WOA18 monthly climatology in the habitat (Fig. C1) of the species except for species in the demersal group for which only a mean climatology is available (see also Sect. 2.2). The slope (change in fraction of total habitat volume per unit change in habitat-mean AGI at  $AGI^{crit}$ ) is calculated from the species' CDF (Sect. 3.4).**

| Species                       | Group | $pO_2^{threshold}$ | $T_{pref}$ | $AGI^{crit}$ | slope |
|-------------------------------|-------|--------------------|------------|--------------|-------|
| <i>Acanthocybium solandri</i> | 1     | 108.70             | 23.87      | 1.73         | 0.14  |

|                                     |   |        |       |      |                     |
|-------------------------------------|---|--------|-------|------|---------------------|
| <i>Alopias superciliosus</i>        | 1 | 130.58 | 24.00 | 1.54 | 0.1 <del>67</del>   |
| <i>Alopias vulpinus</i>             | 1 | 139.30 | 22.11 | 1.39 | 0.2 <del>20</del>   |
| <i>Anarhichas denticulatus</i>      | 3 | 157.21 | 2.11  | 1.31 | 0.7 <del>466</del>  |
| <i>Aphanopus carbo</i>              | 2 | 167.60 | 9.05  | 1.23 | 0.1.3 <del>18</del> |
| <i>Auxis thazard</i>                | 1 | 102.87 | 22.91 | 1.66 | 0.0 <del>89</del>   |
| <i>Beryx decadactylus</i>           | 3 | 61.96  | 4.54  | 1.22 | 0.18                |
| <i>Beryx splendens</i>              | 3 | 64.53  | 4.01  | 1.21 | 0.2 <del>019</del>  |
| <i>Bothus pantherinus</i>           | 3 | 59.14  | 13.69 | 1.56 | 0.16                |
| <i>Brama brama</i>                  | 1 | 148.56 | 19.67 | 1.22 | 0.3 <del>227</del>  |
| <i>Carangoides malabaricus</i>      | 3 | 63.66  | 16.39 | 1.73 | 0.1 <del>76</del>   |
| <i>Carcharhinus falciformis</i>     | 3 | 89.78  | 2.90  | 1.03 | 0.27                |
| <i>Carcharhinus longimanus</i>      | 1 | 126.28 | 25.17 | 1.62 | 0.1 <del>53</del>   |
| <i>Centrolophus niger</i>           | 2 | 61.08  | 9.45  | 1.47 | 0.08                |
| <i>Cephalopholis miniata</i>        | 3 | 58.51  | 14.05 | 1.60 | 0.15                |
| <i>Clupea harengus</i>              | 1 | 197.80 | 6.23  | 1.10 | 0.2 <del>69</del>   |
| <i>Coryphaena hippurus</i>          | 1 | 126.95 | 21.68 | 1.50 | 0.14                |
| <i>Decapterus russelli</i>          | 3 | 60.18  | 14.10 | 1.56 | 0.1 <del>67</del>   |
| <i>Dosidicus gigas</i>              | 2 | 36.09  | 9.68  | 1.43 | 0.07                |
| <i>Elagatis bipinnulata</i>         | 1 | 120.27 | 23.10 | 1.62 | 0.1 <del>43</del>   |
| <i>Epinephelus nigritus</i>         | 3 | 108.37 | 10.45 | 1.32 | 0.3 <del>58</del>   |
| <i>Euthynnus affinis</i>            | 1 | 111.61 | 25.59 | 1.73 | 0.07                |
| <i>Gadus morhua</i>                 | 3 | 180.36 | 3.77  | 1.17 | 0.5 <del>62</del>   |
| <i>Hippoglossoides platessoides</i> | 3 | 166.72 | 5.06  | 1.29 | 0.2 <del>634</del>  |
| <i>Hippoglossus hippoglossus</i>    | 3 | 45.47  | 2.43  | 1.39 | 0.07                |
| <i>Hoplostethus atlanticus</i>      | 2 | 114.96 | 8.73  | 1.47 | 0.1 <del>58</del>   |
| <i>Istiophorus platypterus</i>      | 1 | 127.49 | 21.88 | 1.50 | 0.14                |
| <i>Katsuwonus pelamis</i>           | 1 | 124.89 | 22.27 | 1.55 | 0.14                |
| <i>Lepidocybium flavobrunneum</i>   | 3 | 55.14  | 4.69  | 1.19 | 0.15                |
| <i>Lutjanus argentimaculatus</i>    | 3 | 65.19  | 14.84 | 1.61 | 0.1 <del>67</del>   |
| <i>Makaira nigricans</i>            | 1 | 135.23 | 20.88 | 1.53 | 0.3 <del>50</del>   |
| <i>Melanogrammus aeglefinus</i>     | 3 | 174.00 | 5.09  | 1.21 | 0.3 <del>243</del>  |
| <i>Micromesistius poutassou</i>     | 1 | 202.61 | 7.90  | 0.94 | 2 <del>1.077</del>  |
| <i>Neocyttus rhomboidalis</i>       | 2 | 111.72 | 8.82  | 1.49 | 0.39                |
| <i>Nezumia aequalis</i>             | 3 | 121.60 | 4.27  | 1.04 | 0.4 <del>037</del>  |

|                                |   |        |       |      |                   |
|--------------------------------|---|--------|-------|------|-------------------|
| <i>Prionace glauca</i>         | 1 | 134.23 | 23.07 | 1.46 | 0.168             |
| <i>Sarda sarda</i>             | 1 | 131.21 | 16.89 | 1.33 | 0.267             |
| <i>Scomber japonicus</i>       | 1 | 121.70 | 20.11 | 1.48 | 0.13              |
| <i>Scomberomorus commerson</i> | 1 | 134.73 | 26.23 | 1.55 | 0.147             |
| <i>Sebastes mentella</i>       | 2 | 174.62 | 2.74  | 1.34 | <del>10.508</del> |
| <i>Spectrunculus grandis</i>   | 3 | 118.23 | 1.75  | 1.34 | <del>0.237</del>  |
| <i>Theragra chalcogramma</i>   | 3 | 35.08  | 2.08  | 1.31 | 0.11              |
| <i>Thunnus alalunga</i>        | 1 | 141.59 | 19.75 | 1.33 | 0.178             |
| <i>Thunnus albacares</i>       | 1 | 139.70 | 20.20 | 1.35 | 0.167             |
| <i>Thunnus atlanticus</i>      | 1 | 174.86 | 25.65 | 1.48 | <del>1.6730</del> |
| <i>Thunnus maccoyii</i>        | 1 | 194.28 | 13.76 | 1.00 | 0.664             |
| <i>Thunnus obesus</i>          | 1 | 124.90 | 22.15 | 1.53 | 0.14              |

535 Table A2 CMIP6 multi-model data used in this study.

| Model name           | Institute                                                                                                    | References                                                                                                                                      |
|----------------------|--------------------------------------------------------------------------------------------------------------|-------------------------------------------------------------------------------------------------------------------------------------------------|
| <b>CNRM-ESM2-1</b>   | CNRM: Centre National de Recherches Meteorologiques, Toulouse 31057, France                                  | SSP1-2.6 (Voldoire, 2019a)<br>SSP5-8.5 (Voldoire, 2019b)                                                                                        |
|                      | CERFACS: Centre Européen de Recherche et de Formation Avancée en Calcul Scientifique, Toulouse 31057, France | historical (Séférian, 2018a)<br>piControl (Séférian, 2018b)                                                                                     |
|                      | MPI-M (historical and piControl): Max Planck Institute for Meteorology, Hamburg 20146, Germany               | SSP1-2.6 (Schupfner et al., 2019b)<br>SSP5-8.5 (Schupfner et al., 2019a)                                                                        |
| <b>MPI-ESM1-2-HR</b> | DKRZ (SSP1-2.6 and SSP5-8.5): Deutsches Klimarechenzentrum, Hamburg 20146, Germany                           | historical (Jungclaus et al., 2019b)<br>piControl (Jungclaus et al., 2019a)                                                                     |
|                      | UKESM1-0-LL: MOHC: Met Office Hadley Centre, Fitzroy Road, Exeter, Devon, EX1 3PB, UK                        | SSP1-2.6 (Good et al., 2019a)<br>SSP5-8.5 (Good et al., 2019b)<br>historical (Tang et al., 2019b)<br>piControl (Tang et al., 2019a)             |
| <b>IPSL-CM6A-LR</b>  | IPSL: Institut Pierre Simon Laplace, Paris 75252, France                                                     | SSP1-2.6 (Boucher et al., 2019b)<br>SSP5-8.5 (Boucher et al., 2019a)<br>historical (Boucher et al., 2018b)<br>piControl (Boucher et al., 2018a) |

|                  |                                                                                                                                |                                                                                                                                             |
|------------------|--------------------------------------------------------------------------------------------------------------------------------|---------------------------------------------------------------------------------------------------------------------------------------------|
| <b>CanESM5</b>   | CCCma: Canadian Centre for Climate Modelling and Analysis, Environment and Climate Change Canada, Victoria, BC V8P 5C2, Canada | SSP1-2.6 (Swart et al., 2019d)<br>SSP5-8.5 (Swart et al., 2019b)<br>historical (Swart et al., 2019a)<br>piControl (Swart et al., 2019c)     |
| <b>GFDL-ESM4</b> | NOAA-GFDL: National Oceanic and Atmospheric Administration, Geophysical Fluid Dynamics Laboratory, Princeton, NJ 08540, USA    | SSP1-2.6 (John et al., 2018a)<br>SSP5-8.5 (John et al., 2018b)<br>historical (Krasting et al., 2018b)<br>piControl (Krasting et al., 2018a) |

---

## Appendix B Calculation of $pO_2$

$pO_2$  [mbar] at depth (Taylor, 1978; equation 5 rewritten; Bittig et al., 2018; Sect. E) can be written as a modified Henry's Law:

$$pO_2 = \frac{[O_2]}{K_0} \cdot \exp\left(\frac{V_m \cdot P}{R \cdot T}\right), \quad (B1)$$

$$\text{with } K_0 = \frac{O_2^{sat}}{xO_2 \cdot (1013.25 - pH_2O)},$$

540

and

$[O_2]$  as the insitu  $O_2$  concentration (mol  $kg^{-1}$ ),

$V_m$  the partial molar volume of  $O_2$  ( $31.7 \cdot 10^{-6} \text{ m}^3 \text{ mol}^{-1}$  (Enns et al., 1965)),

$P$  the approximated pressure (Pa;  $P = 1025 \cdot 9.81 \cdot \text{depth}$  with depth in m),

$R$  the gas constant ( $8.3145 \text{ m}^3 \cdot \text{Pa} \cdot \text{K}^{-1} \cdot \text{mol}^{-1}$ ),

545

$T$  the absolute temperature (K),

$O_2^{sat}$  the saturation  $O_2$  concentration (mol  $kg^{-1}$ ),

$xO_2$  the dry air mole fraction of  $O_2$  in air (0.20946; Glueckauf, 1951), and

$pH_2O$  the water vapor pressure (mbar).

550

~~Where The term~~  $\exp\left(\frac{V_m \cdot P}{R \cdot T}\right)$  (unitless) is the pressure correction term for  $O_2^{sat}$ . We ~~then first~~ calculate the saturation concentration of  $O_2$  in seawater (Garcia and Gordon, 1992) in mol  $kg^{-1}$  ~~in using~~ Eq. B2.

$$O_2^{sat} = 10^{-6} * \exp(l) \text{ with} \quad (B2)$$

$$l = A_0 + A_1 * T_{scaled} + A_2 * T_{scaled}^2 + A_3 * T_{scaled}^3 + A_4 * T_{scaled}^4 + A_5 * T_{scaled}^5 + \text{salinity} * (B_0 + B_1 * T_{scaled} + B_2 * T_{scaled}^2 + B_3 * T_{scaled}^3) + C_0 * \text{salinity}^2$$

555

$$+ \text{salinity} * (B_0 + B_1 * T_{scaled} + B_2 * T_{scaled}^2 + B_3 * T_{scaled}^3)$$

$$+ C_0 * \text{salinity}^2$$



560 ~~where  $T_{scaled} = \ln\left(\frac{298.15 - T_{insitu}}{KC + T_{insitu}}\right)$ ,  $KC=273.15$  K and using salinity (psu) and insitu temperature  $T_{insitu}$  (°C). The The unitless constants  $A_{0-5}$ ,  $B_{0-3}$ , and  $C_0$  are listed in Table B1. A constants provide a correction for temperature, the B and C constants a correction for salinity (Benson and Krause, 1984; Garcia and Gordon, 1992; Sarmiento and Gruber, 2006). and are listed in Table B1.~~

**Table B1 Constants for the calculation of  $O_2^{sat}$**

| Constant | Value           |
|----------|-----------------|
| $A_0$    | 5.80871         |
| $A_1$    | 3.20291         |
| $A_2$    | 4.17887         |
| $A_3$    | 5.10006         |
| $A_4$    | -0.0986643      |
| $A_5$    | 3.80369         |
| $B_0$    | -0.00701577     |
| $B_1$    | -0.00770028     |
| $B_2$    | -0.0113864      |
| $B_3$    | -0.00951519     |
| $C_0$    | -0.000000275915 |

565 ~~Last, we~~ calculate the water vapor pressure  $p_{H_2O}$  (mbar) following Weiss and Price (1980) (Eq. B3).

$$p_{H_2O} = 1013.25 \cdot \exp\left(D_0 + D_1 \cdot \frac{100}{T_{insitu} + KC} + D_2 \cdot \ln\left(\frac{T_{insitu} + KC}{100}\right) + D_3 \cdot salinity\right), \quad (A3)$$

~~where with  $D_0=24.4543$ ,  $D_1=-67.4509$ ,  $D_2=-4.8489$ ,  $D_3=-5.44 \cdot 10^{-4}$ .~~

## Appendix C Additional figures

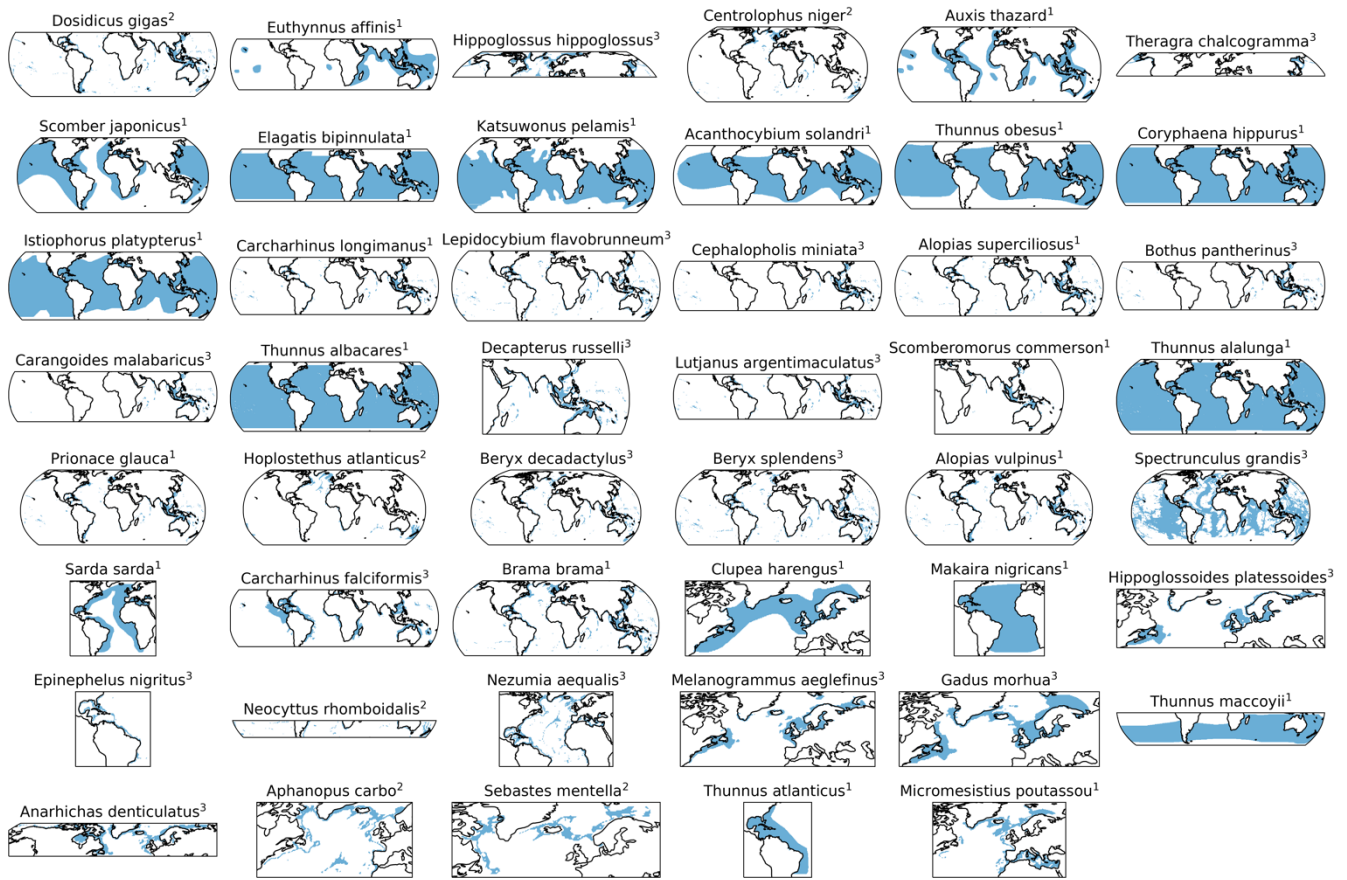

570 **Figure C1** Horizontal distributions for each species in dark grey/blue as based on Close et al. (2006), with superscript indicating the species' depth realm as in Table A1 (1=epipelagic, 2=mesopelagic/bathypelagic, 3=demersal). Species are ordered based on the slope of the CDF (Fig. C95). These 2D habitats were extended over the depth range of the respective species' group for the analysis (Sect. 2.2).

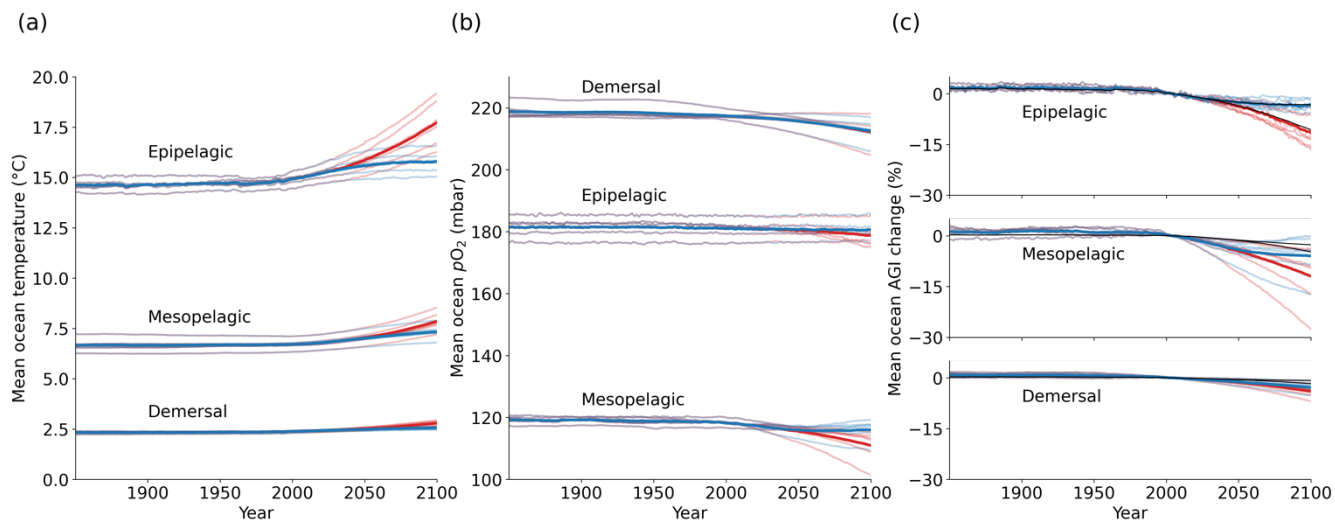

575 **Figure C2** Global mean changes in ocean in-situ temperature in °C (a),  $pO_2$  in mbar (b) and  $AGI^{rel}$  in % (c) for years 1850-2100. The  
 580 **multi-model mean is given in opaque blue (SSP1-2.6) and red (SSP5-8.5). Individual models are shown in light blue and red without  
 taking a running mean.  $AGI^{rel}$  is given relative to the 1995-2014 mean, and the mean contribution from temperature only (excluding  
 the small effect of temperature on  $pO_2$ ) is indicated by the black line in panel (c) and calculated by keeping  $pO_2$  constant at its 1995-  
 2014 mean state when calculating  $AGI^{rel}$ .  $AGI^{rel}$  is entirely species-independent (Eq. 2) and values that exceed 1000% or are below  
 -1000% were excluded during the calculation of the global mean  $AGI$  changes to omit several grid-cells with extreme outliers caused  
 by very small absolute changes in  $O_2$  causing very large changes in  $AGI^{rel}$ .**

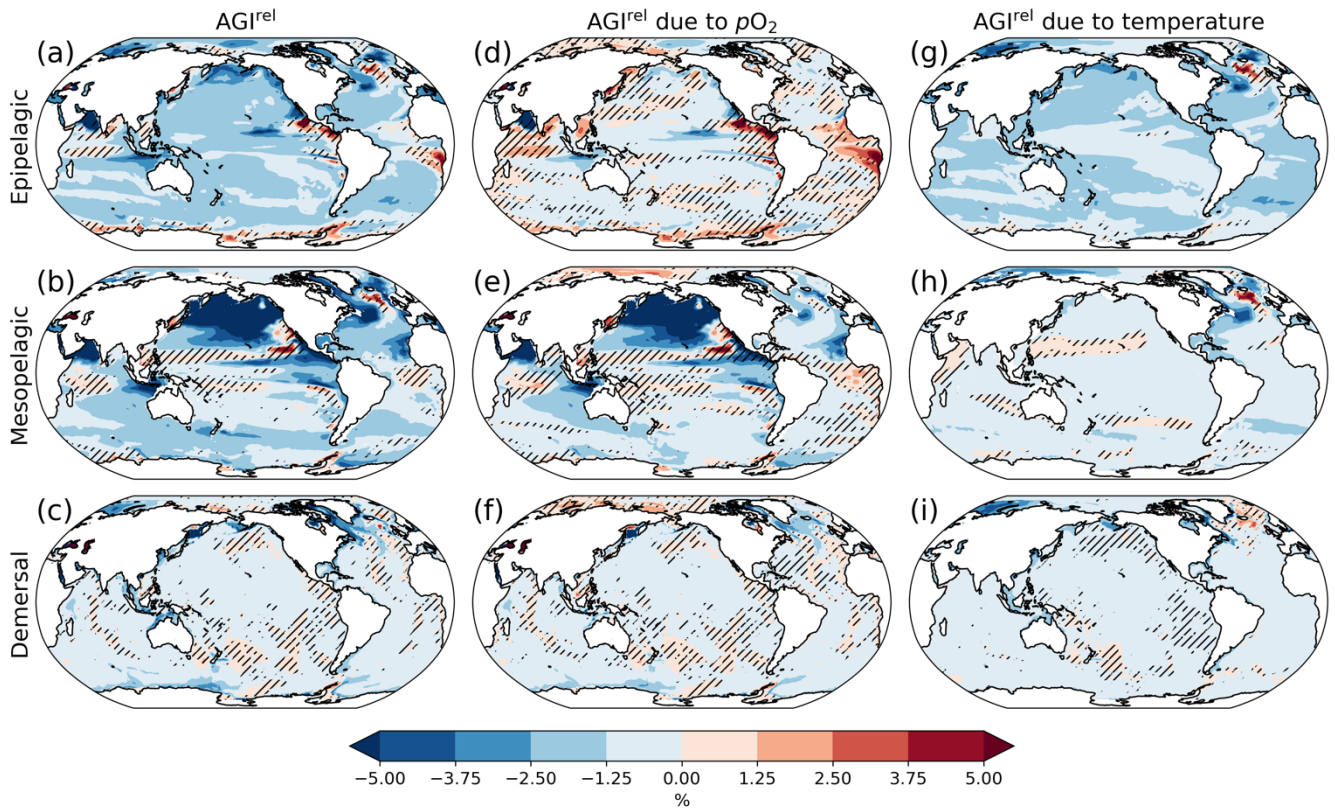

Figure C3 Multi-model mean  $AGI^{rel}$  relative to the 1995-2014 mean at 1.5 °C global warming (using the mean of the SSP1-2.6 and SSP5-8.5 simulations), vertically averaged over the epipelagic and mesopelagic realms, and shown for the demersal realm (a-c).  $AGI^{rel}$  is split up into the contribution from (d-f)  $pO_2$  and (g-i) temperature. Data are hatched where the scenario mean of more than 2 out of the 6 models disagree about the sign of change. Note that sea floor depth and thus demersal depth depends strongly on location. Contributions from  $pO_2$  (temperature) are calculated by keeping temperature ( $pO_2$ ) constant at its 1995-2014 mean state when calculating  $AGI^{rel}$ . Further note that since  $[O_2]$  depends on temperature too, the contribution to  $AGI^{rel}$  from  $pO_2$  also contains a minor temperature component.

585

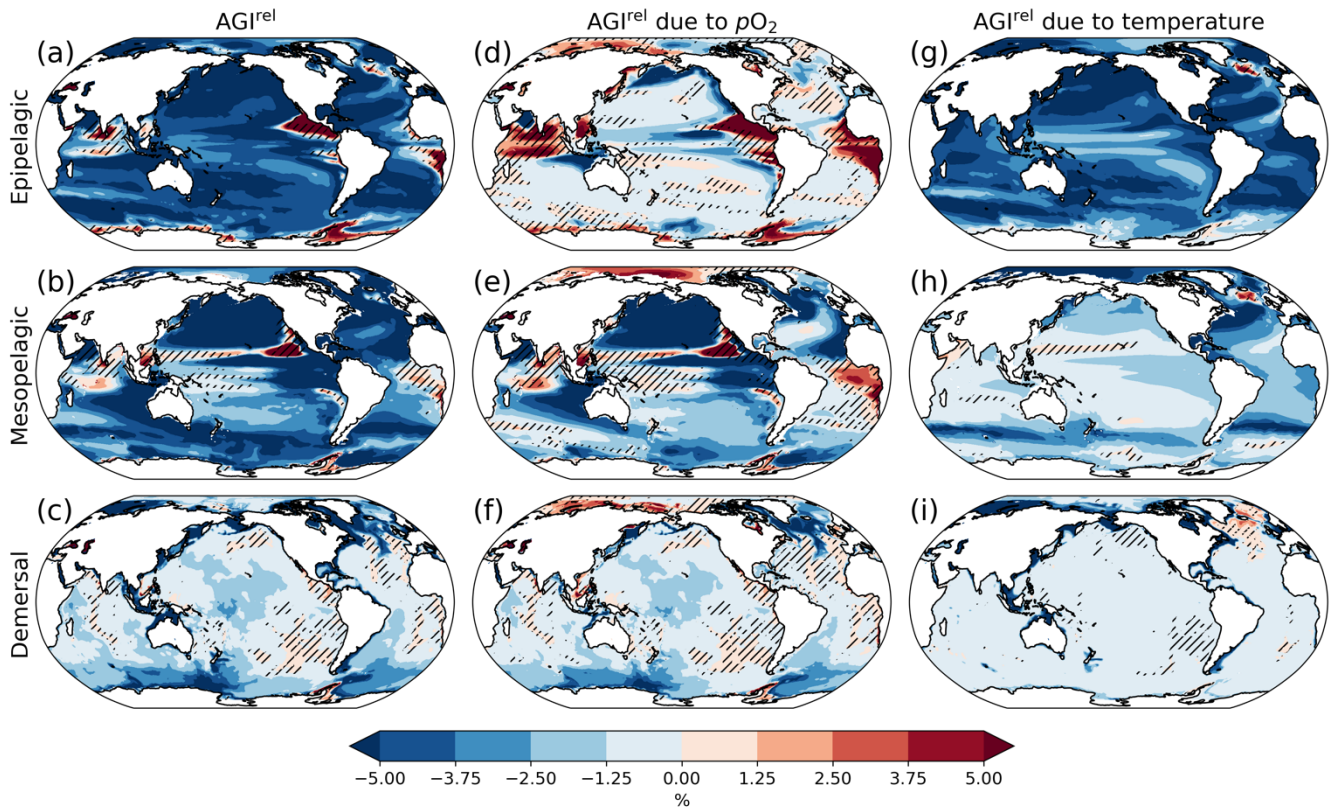

**Figure C4** Same as Figure C3, but for 3°C global warming (and therefore using SSP5-8.5 simulations only).

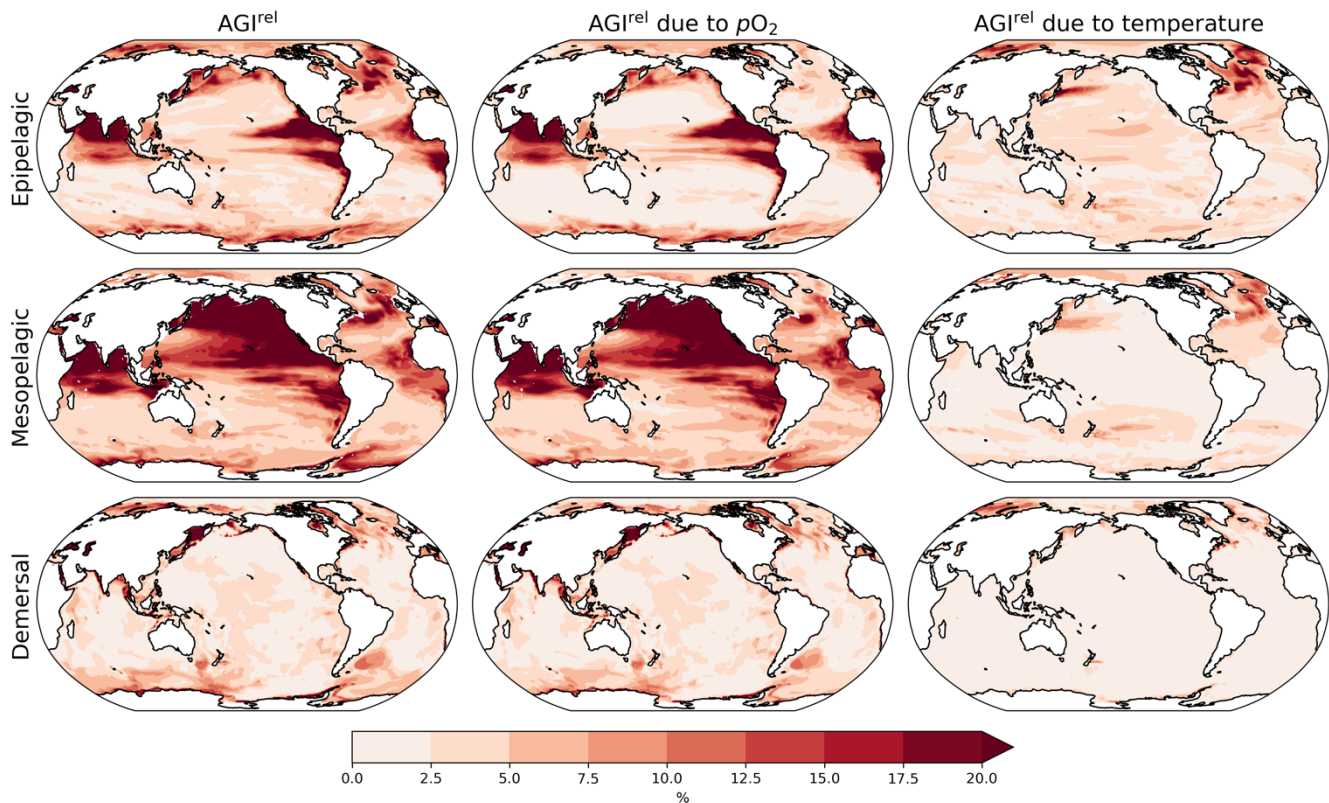

Figure C52 Multi-model range of  $AGI^{rel}$  at  $2^{\circ}C$  global warming for the three depth intervals studied.

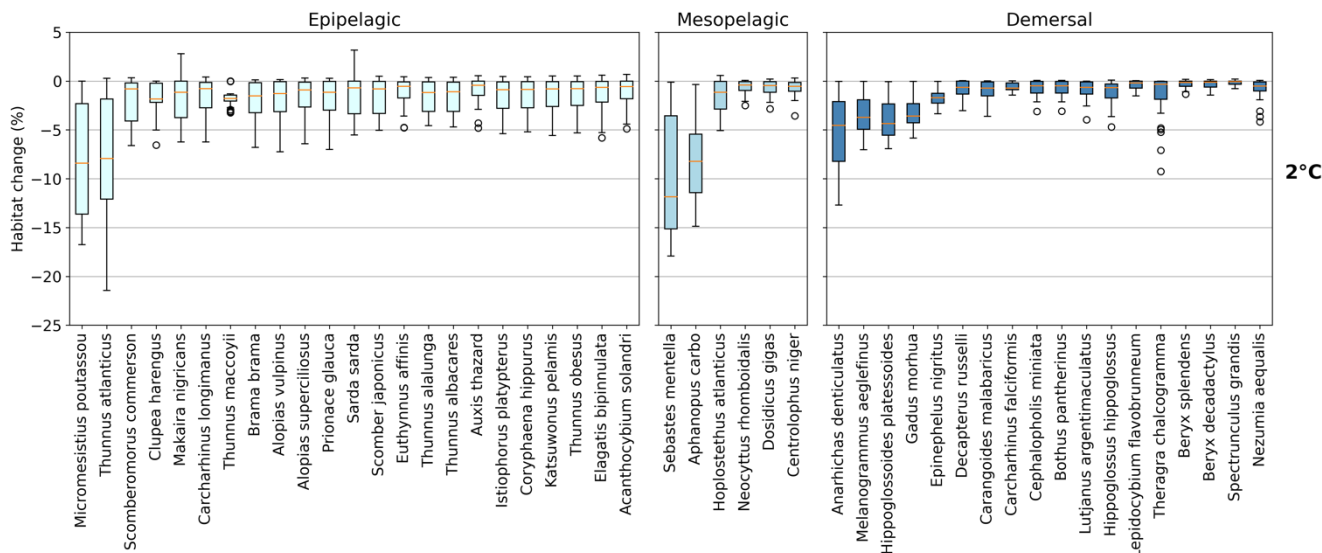

Figure C63 **Habitat change (%)** Percentage of **remaining** contemporary (1995-2014) habitat volume for  $2^{\circ}C$  global warming **shown similar to Fig. 3**, including 5 levels of  $AGI^{crit}$  in every species' boxplot (number of datapoints  $n=5$   $AGI^{crit}$  levels \* 6 models = 30):  $AGI^{crit}$  **is taken** as the minimum in-habitat  $AGI$  value, the 5<sup>th</sup> percentile, the 10<sup>th</sup> percentile, the 15<sup>th</sup> percentile and the 20<sup>th</sup> percentile, **respectively**. Note the different y-axis when comparing to Fig. 3. Each boxplot indicates the median in orange and a box bounded by

595

the interquartile range (IQR; the 25<sup>th</sup> to 75<sup>th</sup> percentiles) and the whiskers extending to the data range with a maximum of 1.5×IQR, with outliers as open circles.

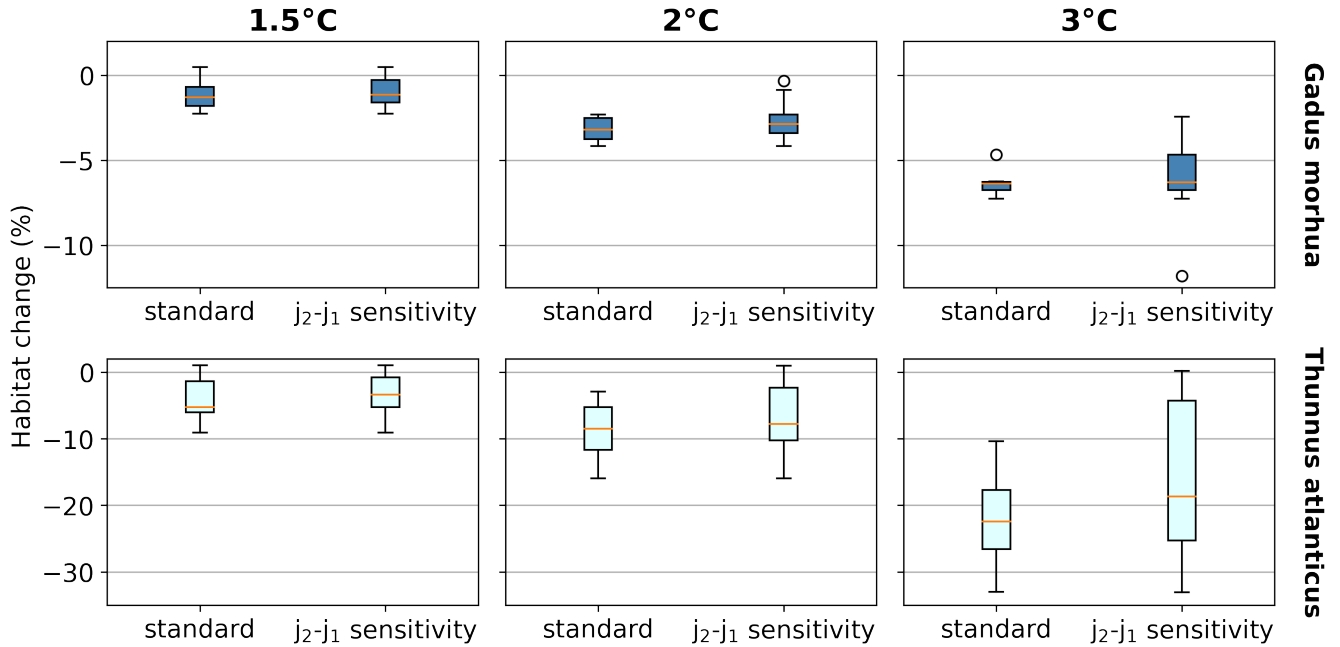

**Figure C7** Habitat change (%) sensitivity to the choice of  $j_2-j_1$  for the species *Gadus morhua* and *Thunnus atlanticus*. Standard results are as in Fig. 3 and use the standard  $j_2-j_1=3500K$  (Sect. 2.1). For ‘ $j_2-j_1$  sensitivity’,  $j_2-j_1$  is adjusted to represent low (high) temperature sensitivity of 1000K (6000K), which is equivalent to varying the standard  $j_2$  and  $j_1$  by  $\pm 20\%$  (resulting in the difference  $j_2-j_1$  being varied by  $\pm \sim 71\%$ ), and recalculating AGI,  $AGI^{crit}$  and volume loss for each  $j_2-j_1$ . The standard, low and high  $j_2-j_1$  are all included in the ‘ $j_2-j_1$  sensitivity’ boxplots.

600

605

610

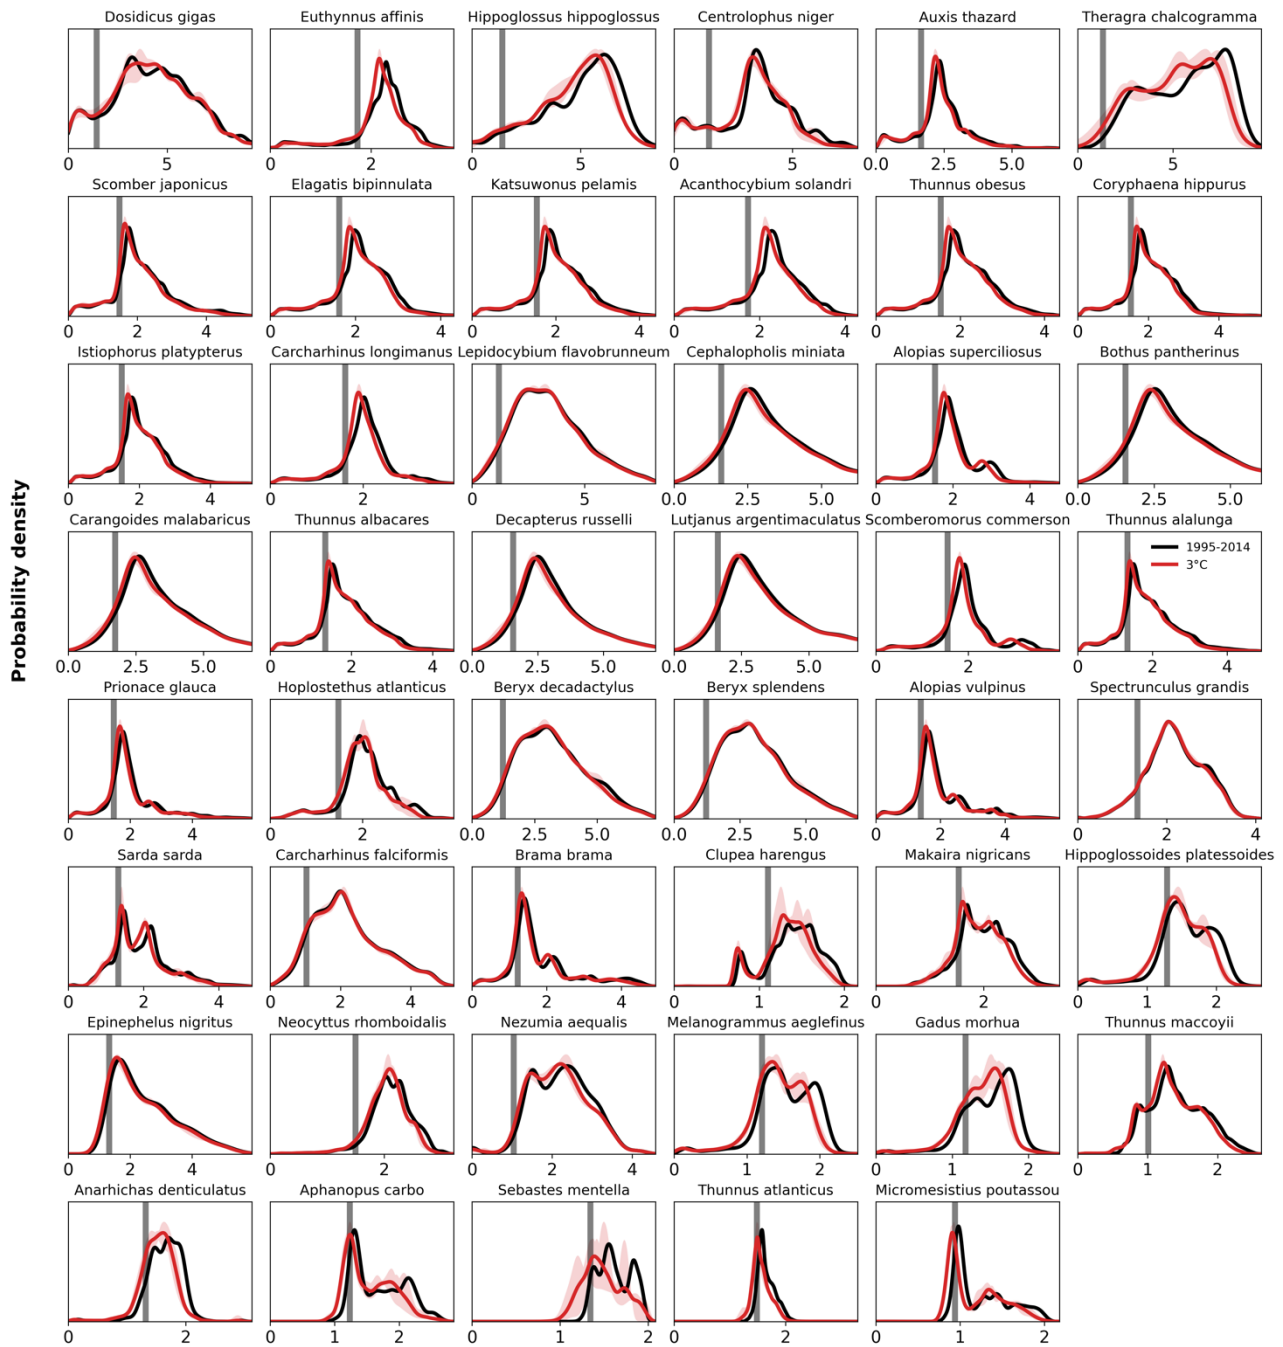

615 Figure C84 Probability density of AGI for each species for the contemporary reference period 1995-2014 (in black) and for 3°C global warming (in red with shaded model range). The PDF is a kernel-density estimate using Gaussian kernels, calculated using Python’s SciPy package function ‘gaussian\_kde’ with grid-cell volume taken as weights, following Scott’s Rule, and evaluated at 50000 points from an AGI of 0 to 25. Species are ordered based on the slope of the CDF (Fig. C95).



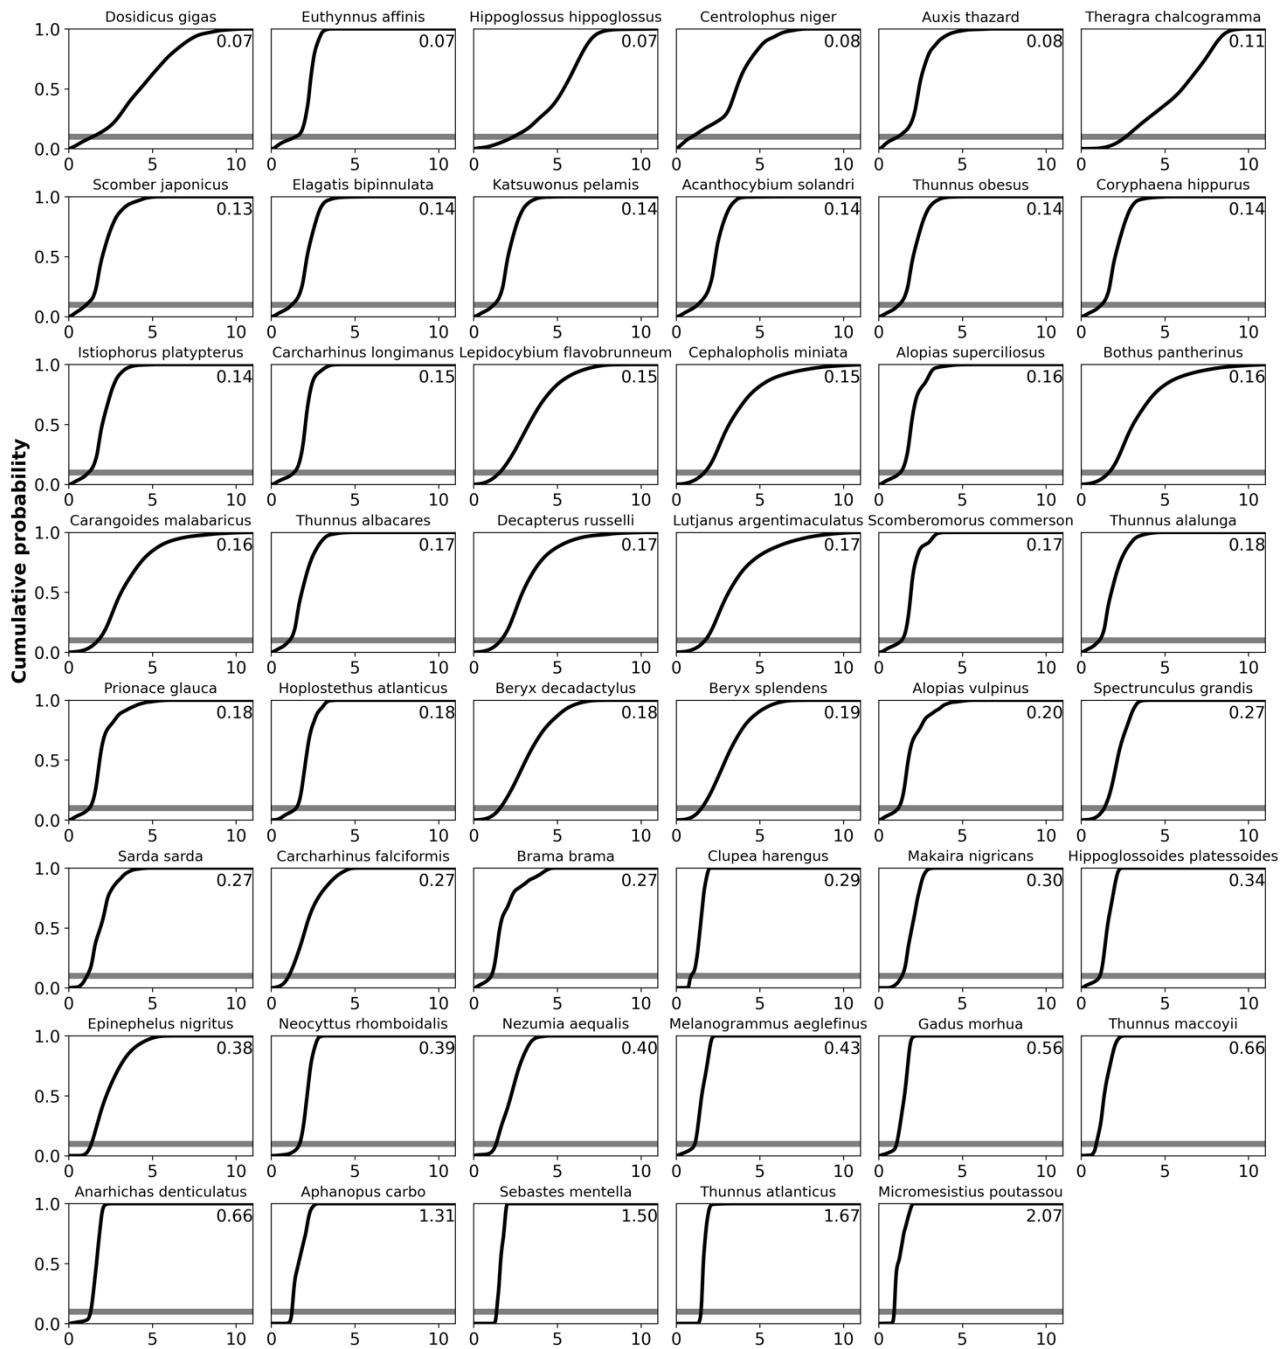

620 Figure C95 Cumulative density function of AGI at 1995-2014 for each species with “vulnerability” annotated in upper right corner (=slope at cumulative density of 0.1; i.e., at AGI=AGI<sup>crit</sup>). The cumulative density is calculated as the cumulative sum of the probabilities in the PDF estimate (Fig. C84), normalized to a sum of 1. Species are ordered based on their slope.

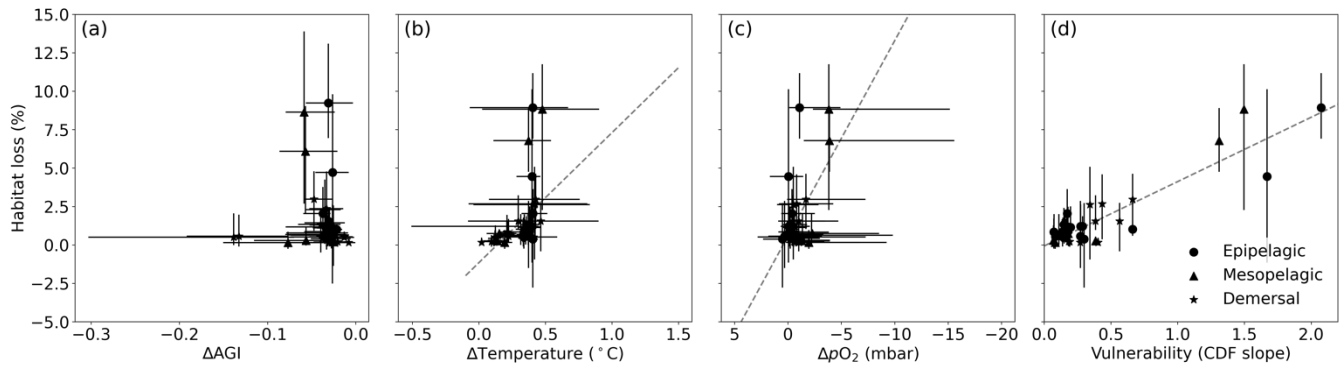

625 **Figure C10 Multi-model mean in-habitat changes at 1.5°C of global warming of (a) AGI, (b) temperature, (c)  $pO_2$  (mean over SSP1-2.6 and SSP5-8.5) and (d) vulnerability (CDF slope at a cumulative density of 0.1 based on 1995-2014 mean data, Fig. C9) plotted against loss of contemporary habitat volume for each species (model range indicated by error bars). There is no uncertainty in the vulnerability calculation because all models have the same 1995-2014 CDF slope due to the WOA18 bias-correction. From a linear regression to the data which is plotted in dashed grey we find an  $R^2$  of 0.0% for (a) which line is therefore not plotted, 25% for (b), 630 27% for (c) and 85% for (d).**

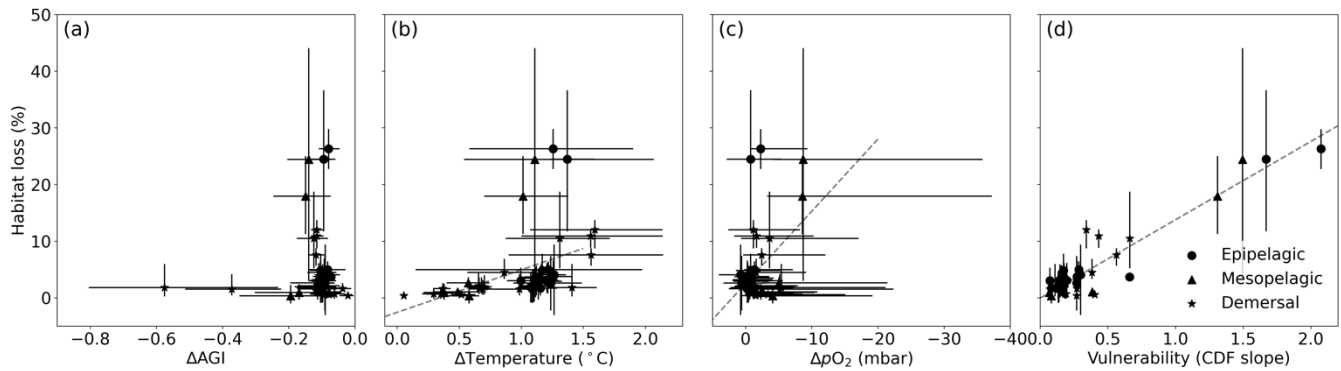

**Figure C11 Same as Fig. C10, but for 3°C global warming (and therefore using SSP5-8.5 simulations only).**

635

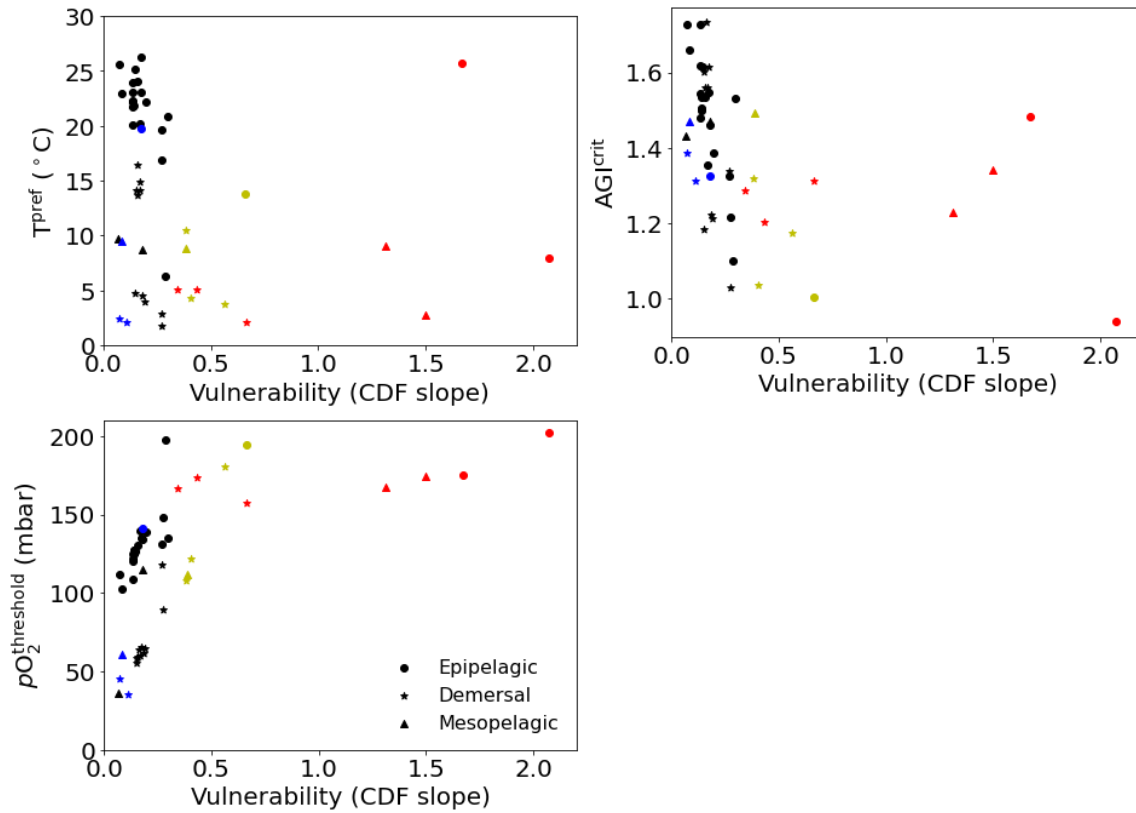

**Figure C12** For each species  $T_{pref}$ ,  $AGI^{crit}$  and  $pO_2^{threshold}$  (see also Table A1) plotted against their vulnerability (=slope at cumulative density of 0.1; i.e., at  $AGI=AGI^{crit}$ ; see also Fig. C9, Fig. 6, Table A1). Colors as in Fig. 6: For 2 °C global warming, species with > 5% loss marked in red, more than  $-0.1 \Delta AGI$  in blue, and volume loss < 5% as well as vulnerability > 0.3 in yellow.

640

645

650

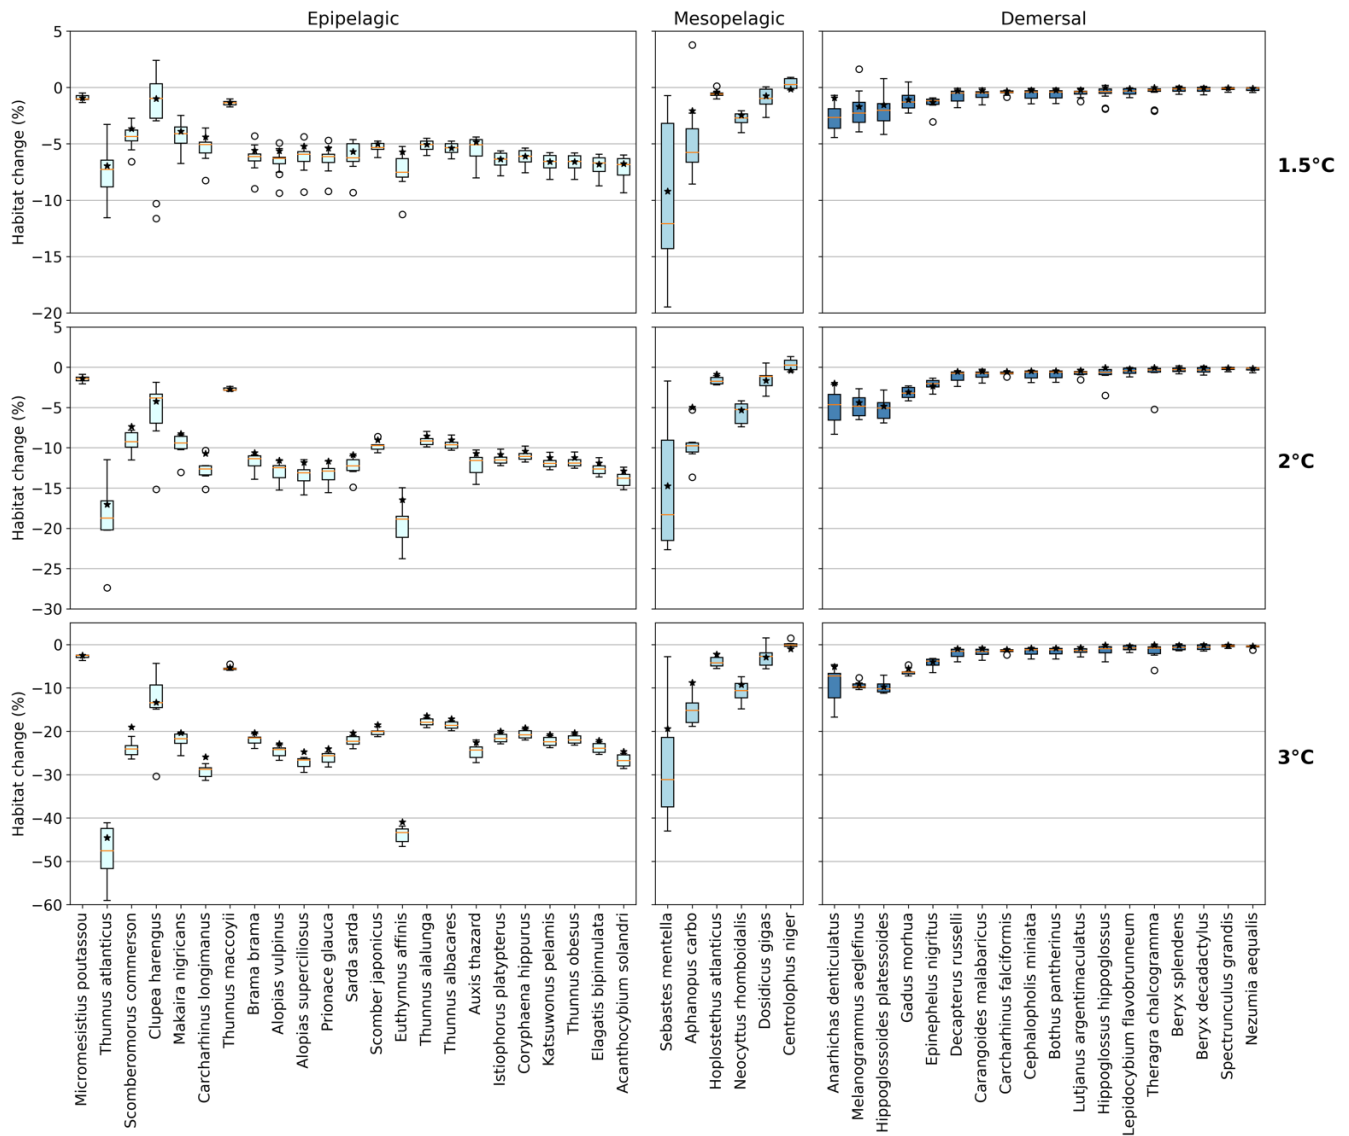

**Figure C137** Habitat change (%) of contemporary (1995-2014) habitat volume for different levels of global warming, with negative values indicating habitat loss and positive values indicating habitat gain. Percentage of remaining contemporary (1995-2014) habitat volume of the surface layer (or bottom layer/sea floor for demersal species) for different levels of global warming. This figure is the same as Fig. 3, but here applying surface values only in calculating  $pO_2^{\text{threshold}}$ ,  $T^{\text{pref}}$  and  $AGI^{\text{crit}}$  and hence  $AGI$  and  $\text{volume} < AGI^{\text{crit}}$ . Demersal results are logically the same as in Fig. 3 as these consider only the sea floor. Note the different y-axes (also when comparing to Fig. 3). Each boxplot indicates the median in orange and a box bounded by the interquartile range (IQR; the 25<sup>th</sup> to 75<sup>th</sup> percentiles) and the whiskers extending to the data range with a maximum of 1.5×IQR, with outliers as open circles. As changes are expressed relative to the contemporary viable habitat volume (which is by definition 90% of the total habitat volume), values up to 104% (=100+90) are possible.

655

660

## Data availability

665 ~~Scripts used in our analysis will be shared with a DOI upon publication of this manuscript.~~ [The CMIP6 model data are available at the Earth System Grid Federation \(<https://esgf-node.llnl.gov/search/cmip6>; see Table A2 for references\). The HadCRUT.5.0.1.0 data \(retrieved 26<sup>th</sup> of April 2022\) are taken from Morice et al. \(2021\). The species habitat data are available at \(\[DOI made upon publication of this manuscript\]\(#\)\). Scripts to make the figures will be shared on request to A. L. Morée.](#)

## Author contributions

670 All authors contributed to the conceptualization of the study. AM and TF collected the model data, while WC and TC provided species data. AM executed the formal analysis, investigation, and validation of the study with input from all co-authors. The extended version of AGI methodology was developed through discussion between all authors. AM wrote the initial draft and visualized the results with input from all co-authors.

## Competing interests

The authors declare that they have no conflict of interest.

## Acknowledgments

675 This study has been supported by the Swiss National Science Foundation under grant PP00P2\_198897 and the European Union's Horizon 2020 research and innovation programme under grant agreement No 820989 (project COMFORT, Our common future ocean in the Earth system – quantifying coupled cycles of carbon, oxygen, and nutrients for determining and achieving safe operating spaces with respect to tipping points). We acknowledge the World Climate Research Programme, which, through its Working Group on Coupled Modelling, coordinated and promoted CMIP6. We thank the climate modelling groups for producing and making available their model output, the Earth System Grid Federation (ESGF) for archiving the data and providing access, and the multiple funding agencies who support CMIP6 and ESGF. The work reflects only the author's/authors' view; the European Commission and their executive agency are not responsible for any use that may be made of the information the work contains. We thank B. B. Cael for his suggestions for calculating the species' CDFs and Mridul K. Thomas for discussing the results with us. [We thank the editor Mike Roman as well as two anonymous referees for their time to provide constructive feedback to our manuscript.](#)

680

## 685 References

Andrews, O. D., Bindoff, N. L., Halloran, P. R., Ilyina, T., and Le Quéré, C.: Detecting an external influence on recent changes in oceanic oxygen using an optimal fingerprinting method, *Biogeosciences*, 10, 1799-1813, 10.5194/bg-10-1799-2013, 2013.

- 690 Baumann, H., Wallace, R. B., Tagliaferri, T., and Gobler, C. J.: Large Natural pH, CO<sub>2</sub> and O<sub>2</sub> Fluctuations in a Temperate Tidal Salt Marsh on Diel, Seasonal, and Interannual Time Scales, *Estuaries and Coasts*, 38, 220-231, 10.1007/s12237-014-9800-y, 2015.
- Benson, B. B. and Krause, D.: The concentration and isotopic fractionation of oxygen dissolved in freshwater and seawater in equilibrium with the atmosphere, *Limnology and Oceanography*, 29, 620-632, <https://doi.org/10.4319/lo.1984.29.3.0620>, 1984.
- 695 Bindoff, N. L., Cheung, W. W. L., Kairo, J. G., Aristegui, J., Guinder, V. A., Hallberg, R., Hilmi, N., Jiao, N., Karim, M. s., Levin, L., O'Donoghue, S., Purca Cuicapusa, S. R., Rinkevich, B., Suga, T., Tagliabue, A., and Williamson, P.: Chapter 5: Changing Ocean, Marine Ecosystems, and Dependent Communities, IPCC Special Report on the Ocean and Cryosphere (SROCC), 2019.
- 700 Bittig, H., Körtzinger, A., Johnson, K., Claustre, H., Emerson, S., Fennel, K., Garcia, H., Gilbert, D., Gruber, N., Kang, D.-J., Naqvi, W., Prakash, S., Riser, S., Thierry, V., Tilbrook, B., Uchida, H., Ulloa, O., and Xing, X.: SCOR WG 142: Quality Control Procedures for Oxygen and Other Biogeochemical Sensors on Floats and Gliders. Recommendations on the conversion between oxygen quantities for Bio-Argo floats and other autonomous sensor platforms, *Ifremer*, 10.13155/45915, 2018.
- Bopp, L., Resplandy, L., Orr, J. C., Doney, S. C., Dunne, J. P., Gehlen, M., Halloran, P., Heinze, C., Ilyina, T., Séférian, R., Tjiputra, J., and Vichi, M.: Multiple stressors of ocean ecosystems in the 21st century: projections with CMIP5 models, *Biogeosciences*, 10, 6225-6245, 10.5194/bg-10-6225-2013, 2013.
- 705 Boucher, O., Denvil, S., Levvasseur, G., Cozic, A., Caubel, A., Foujols, M.-A., Meurdesoif, Y., Cadule, P., Devilliers, M., Dupont, E., and Lurton, T.: IPSL IPSL-CM6A-LR model output prepared for CMIP6 ScenarioMIP ssp585, 10.22033/ESGF/CMIP6.5271, 2019a.
- Boucher, O., Denvil, S., Levvasseur, G., Cozic, A., Caubel, A., Foujols, M.-A., Meurdesoif, Y., Cadule, P., Devilliers, M., Dupont, E., and Lurton, T.: IPSL IPSL-CM6A-LR model output prepared for CMIP6 ScenarioMIP ssp126, Earth System Grid Federation [dataset], 10.22033/ESGF/CMIP6.5262, 2019b.
- 710 Boucher, O., Denvil, S., Levvasseur, G., Cozic, A., Caubel, A., Foujols, M.-A., Meurdesoif, Y., Cadule, P., Devilliers, M., Ghattas, J., Lebas, N., Lurton, T., Mellul, L., Musat, I., Mignot, J., and Cheruy, F.: IPSL IPSL-CM6A-LR model output prepared for CMIP6 CMIP piControl, Earth System Grid Federation [dataset], 10.22033/ESGF/CMIP6.5251, 2018a.
- 715 Boucher, O., Denvil, S., Levvasseur, G., Cozic, A., Caubel, A., Foujols, M.-A., Meurdesoif, Y., Cadule, P., Devilliers, M., Ghattas, J., Lebas, N., Lurton, T., Mellul, L., Musat, I., Mignot, J., and Cheruy, F.: IPSL IPSL-CM6A-LR model output prepared for CMIP6 CMIP historical, 10.22033/ESGF/CMIP6.5195, 2018b.
- Boyd, P. W., Collins, S., Dupont, S., Fabricius, K., Gattuso, J.-P., Havenhand, J., Hutchins, D. A., Riebesell, U., Rintoul, M. S., Vichi, M., Biswas, H., Ciotti, A., Gao, K., Gehlen, M., Hurd, C. L., Kurihara, H., McGraw, C. M., Navarro, J. M., Nilsson, G. E., Passow, U., and Pörtner, H.-O.: Experimental strategies to assess the biological ramifications of multiple drivers of global ocean change—A review, *Global Change Biology*, 24, 2239-2261, <https://doi.org/10.1111/gcb.14102>, 2018.
- 720 Boyer, T. P., Garcia, H. E., Locarnini, R. A., Zweng, M. M., Mishonov, A. V., Reagan, J. R., Weathers, K. W., Baranova, O. K., Seidov, D., and Smolyar, I. V.: World Ocean Atlas 2018 [oxygen, salinity and temperature] [dataset], 2018.
- Breitburg, D., Levin, L. A., Oschlies, A., Grégoire, M., Chavez, F. P., Conley, D. J., Garçon, V., Gilbert, D., Gutiérrez, D., Isensee, K., Jacinto, G. S., Limburg, K. E., Montes, I., Naqvi, S. W. A., Pitcher, G. C., Rabalais, N. N., Roman, M. R., Rose, K. A., Seibel, B. A., Telszewski, M., Yasuhara, M., and Zhang, J.: Declining oxygen in the global ocean and coastal waters, *Science*, 359, eaam7240, doi:10.1126/science.aam7240, 2018.
- 725 Bryndum-Buchholz, A., Tittensor, D. P., Blanchard, J. L., Cheung, W. W. L., Coll, M., Galbraith, E. D., Jennings, S., Maury, O., and Lotze, H. K.: Twenty-first-century climate change impacts on marine animal biomass and ecosystem structure across ocean basins, *Global Change Biology*, 25, 459-472, <https://doi.org/10.1111/gcb.14512>, 2019.
- 730 Buchanan, P. J. and Tagliabue, A.: The Regional Importance of Oxygen Demand and Supply for Historical Ocean Oxygen Trends, *Geophysical Research Letters*, 48, e2021GL094797, <https://doi.org/10.1029/2021GL094797>, 2021.
- Cabré, A., Marinov, I., Bernardello, R., and Bianchi, D.: Oxygen minimum zones in the tropical Pacific across CMIP5 models: mean state differences and climate change trends, *Biogeosciences*, 12, 5429-5454, 10.5194/bg-12-5429-2015, 2015.
- 735 Casanueva, A., Herrera, S., Iturbide, M., Lange, S., Jury, M., Dosio, A., Maraun, D., and Gutiérrez, J. M.: Testing bias adjustment methods for regional climate change applications under observational uncertainty and resolution mismatch, *Atmospheric Science Letters*, 21, e978, <https://doi.org/10.1002/asl.978>, 2020.

- Cheung, W. W., Lam, V. W., and Pauly, D.: Dynamic bioclimate envelope model to predict climate-induced changes in distribution of marine fishes and invertebrates., 5-50, 2008.
- 740 Cheung, W. W. L., Reygondeau, G., and Frölicher, T. L.: Large benefits to marine fisheries of meeting the 1.5C global warming target, *Science*, 354, 1591-1594, doi:10.1126/science.aag2331, 2016.
- Cheung, W. W. L., Dunne, J., Sarmiento, J. L., and Pauly, D.: Integrating ecophysiology and plankton dynamics into projected maximum fisheries catch potential under climate change in the Northeast Atlantic, *ICES Journal of Marine Science*, 68, 1008-1018, 10.1093/icesjms/fsr012, 2011.
- 745 Cheung, W. W. L., Lam, V. W. Y., Sarmiento, J. L., Kearney, K., Watson, R., and Pauly, D.: Projecting global marine biodiversity impacts under climate change scenarios, *Fish and Fisheries*, 10, 235-251, <https://doi.org/10.1111/j.1467-2979.2008.00315.x>, 2009.
- CHEUNG, W. W. L., LAM, V. W. Y., SARMIENTO, J. L., KEARNEY, K., WATSON, R., ZELLER, D., and PAULY, D.: Large-scale redistribution of maximum fisheries catch potential in the global ocean under climate change, *Global Change Biology*, 16, 24-35, <https://doi.org/10.1111/j.1365-2486.2009.01995.x>, 2010.
- 750 Cheung, W. W. L., Frölicher, T. L., Lam, V. W. Y., Oyinlola, M. A., Reygondeau, G., Sumaila, U. R., Tai, T. C., Teh, L. C. L., and Wabnitz, C. C. C.: Marine high temperature extremes amplify the impacts of climate change on fish and fisheries, *Science Advances*, 7, eabh0895, 10.1126/sciadv.abh0895, 2021.
- Clarke, T. M., Wabnitz, C. C. C., Striegel, S., Frölicher, T. L., Reygondeau, G., and Cheung, W. W. L.: Aerobic Growth Index (AGI): an index to understand the impacts of ocean warming and deoxygenation on global marine fisheries resources, *Progress in Oceanography*, 195, 102588, <https://doi.org/10.1016/j.pocean.2021.102588>, 2021.
- 755 Close, C., Cheung, W. L., Hodgson, S., Lam, V., Watson, R., and Pauly, D.: Distribution ranges of commercial fishes and invertebrates, in: *Fishes in Databases and Ecosystems*. Fisheries Centre Research Reports, Fisheries Centre, Univ. British Columbia, Vancouver, 2006.
- Cocco, V., Joos, F., Steinacher, M., Frölicher, T. L., Bopp, L., Dunne, J., Gehlen, M., Heinze, C., Orr, J., Oschlies, A., Schneider, B., Segschneider, J., and Tjiputra, J.: Oxygen and indicators of stress for marine life in multi-model global warming projections, *Biogeosciences*, 10, 1849-1868, 10.5194/bg-10-1849-2013, 2013.
- Collins, M., Truebano, M., Verberk, W. C. E. P., and Spicer, J. I.: Do aquatic ectotherms perform better under hypoxia after warm acclimation?, *Journal of Experimental Biology*, 224, 10.1242/jeb.232512, 2021.
- Collins, S., Whittaker, H., and Thomas, M. K.: The need for unrealistic experiments in global change biology, *Current Opinion in Microbiology*, 68, 102151, <https://doi.org/10.1016/j.mib.2022.102151>, 2022.
- 765 Deser, C., Alexander, M. A., Xie, S.-P., and Phillips, A. S.: Sea Surface Temperature Variability: Patterns and Mechanisms, *Annual Review of Marine Science*, 2, 115-143, 10.1146/annurev-marine-120408-151453, 2009.
- Deutsch, C., Penn, J. L., and Seibel, B.: Metabolic trait diversity shapes marine biogeography, *Nature*, 585, 557-562, 10.1038/s41586-020-2721-y, 2020.
- 770 Deutsch, C., Ferrel, A., Seibel, B., Pörtner, H.-O., and Huey, R. B.: Climate change tightens a metabolic constraint on marine habitats, *Science*, 348, 1132, 10.1126/science.aaa1605, 2015.
- Doney, S. C., Ruckelshaus, M., Emmett Duffy, J., Barry, J. P., Chan, F., English, C. A., Galindo, H. M., Grebmeier, J. M., Hollowed, A. B., Knowlton, N., Polovina, J., Rabalais, N. N., Sydeman, W. J., and Talley, L. D.: Climate Change Impacts on Marine Ecosystems, *Annual Review of Marine Science*, 4, 11-37, 10.1146/annurev-marine-041911-111611, 2011.
- 775 Enns, T., Scholander, P. F., and Bradstreet, E. D.: Effect of Hydrostatic Pressure on Gases Dissolved in Water, *The Journal of Physical Chemistry*, 69, 389-391, 10.1021/j100886a005, 1965.
- Eyring, V., Bony, S., Meehl, G. A., Senior, C. A., Stevens, B., Stouffer, R. J., and Taylor, K. E.: Overview of the Coupled Model Intercomparison Project Phase 6 (CMIP6) experimental design and organization, *Geosci. Model Dev.*, 9, 1937-1958, 10.5194/gmd-9-1937-2016, 2016.
- 780 Fernandes, J. A., Cheung, W. W. L., Jennings, S., Butenschön, M., de Mora, L., Frölicher, T. L., Barange, M., and Grant, A.: Modelling the effects of climate change on the distribution and production of marine fishes: accounting for trophic interactions in a dynamic bioclimate envelope model, *Global Change Biology*, 19, 2596-2607, <https://doi.org/10.1111/gcb.12231>, 2013.
- Frölicher, T. L. and Laufkötter, C.: Emerging risks from marine heat waves, *Nature Communications*, 9, 650, 10.1038/s41467-018-03163-6, 2018.

- 785 Frölicher, T. L., Joos, F., Plattner, G. K., Steinacher, M., and Doney, S. C.: Natural variability and anthropogenic trends in oceanic oxygen in a coupled carbon cycle–climate model ensemble, *Global Biogeochemical Cycles*, 23, <https://doi.org/10.1029/2008GB003316>, 2009.
- Frölicher, T. L., Aschwanden, M. T., Gruber, N., Jaccard, S. L., Dunne, J. P., and Paynter, D.: Contrasting Upper and Deep Ocean Oxygen Response to Protracted Global Warming, *Global Biogeochemical Cycles*, 34, e2020GB006601, <https://doi.org/10.1029/2020GB006601>, 2020.
- 790 Garcia, H. E. and Gordon, L. I.: Oxygen solubility in seawater: Better fitting equations, *Limnology and Oceanography*, 37, 1307-1312, <https://doi.org/10.4319/lo.1992.37.6.1307>, 1992.
- Garcia, H. E., Weathers, K. W., Paver, C. R., Smolyar, I. V., Boyer, T. P., Locarnini, R. A., Zweng, M. M., Mishonov, A. V., Baranova, O. K., Seidov, D., and Reagan, J. R.: World Ocean Atlas 2018, Volume 3: Dissolved Oxygen, Apparent Oxygen Utilization, and Dissolved Oxygen Saturation. A. Mishonov Technical Ed., NOAA Atlas NESDIS 83, 38 pp., 2019.
- 795 García-Molinos, J., Halpern, Benjamin S., Schoeman, David S., Brown, Christopher J., Kiessling, W., Moore, Pippa J., Pandolfi, John M., Poloczanska, Elvira S., Richardson, Anthony J., and Burrows, Michael T.: Climate velocity and the future global redistribution of marine biodiversity, *Nature Climate Change*, 6, 83-88, [10.1038/nclimate2769](https://doi.org/10.1038/nclimate2769), 2016.
- Glueckauf, E.: The Composition of Atmospheric Air, in: *Compendium of Meteorology: Prepared under the Direction of the Committee on the Compendium of Meteorology*, edited by: Byers, H. R., Landsberg, H. E., Wexler, H., Haurwitz, B., Spilhaus, A. F., Willett, H. C., Houghton, H. G., and Malone, T. F., American Meteorological Society, Boston, MA, 3-10, [10.1007/978-1-940033-70-9\\_1](https://doi.org/10.1007/978-1-940033-70-9_1), 1951.
- Good, P., Sellar, A., Tang, Y., Rumbold, S., Ellis, R., Kelley, D., and Kuhlbrodt, T.: MOHC UKESM1.0-LL model output prepared for CMIP6 ScenarioMIP ssp126, Earth System Grid Federation [dataset], [10.22033/ESGF/CMIP6.6333](https://doi.org/10.22033/ESGF/CMIP6.6333), 2019a.
- 805 Good, P., Sellar, A., Tang, Y., Rumbold, S., Ellis, R., Kelley, D., and Kuhlbrodt, T.: MOHC UKESM1.0-LL model output prepared for CMIP6 ScenarioMIP ssp585, [10.22033/ESGF/CMIP6.6405](https://doi.org/10.22033/ESGF/CMIP6.6405), 2019b.
- Gotelli, N. J., Moyes, F., Antão, L. H., Blowes, S. A., Dornelas, M., McGill, B. J., Penny, A., Schipper, A. M., Shimadzu, H., Supp, S. R., Waldo, C. A., and Magurran, A. E.: Long-term changes in temperate marine fish assemblages are driven by a small subset of species, *Global Change Biology*, 28, 46-53, <https://doi.org/10.1111/gcb.15947>, 2021.
- 810 Grégoire, M., Garçon, V., Garcia, H., Breitburg, D., Isensee, K., Oschlies, A., Telszewski, M., Barth, A., Bittig, H. C., Carstensen, J., Carval, T., Chai, F., Chavez, F., Conley, D., Coppola, L., Crowe, S., Currie, K., Dai, M., Deflandre, B., Dewitte, B., Diaz, R., Garcia-Robledo, E., Gilbert, D., Giorgetti, A., Glud, R., Gutierrez, D., Hosoda, S., Ishii, M., Jacinto, G., Langdon, C., Lauvset, S. K., Levin, L. A., Limburg, K. E., Mehrrens, H., Montes, I., Naqvi, W., Paulmier, A., Pfeil, B., Pitcher, G., Pouliquen, S., Rabalais, N., Rabouille, C., Recape, V., Roman, M., Rose, K., Rudnick, D., Rummer, J., Schmechtig, C., Schmidt, S., Seibel, B., Slomp, C., Sumalia, U. R., Tanhua, T., Thierry, V., Uchida, H., Wanninkhof, R., and Yasuhara, M.: A Global Ocean Oxygen Database and Atlas for Assessing and Predicting Deoxygenation and Ocean Health in the Open and Coastal Ocean, *Frontiers in Marine Science*, 8, [10.3389/fmars.2021.724913](https://doi.org/10.3389/fmars.2021.724913), 2021.
- 815 Gruber, N., Boyd, P. W., Frölicher, T. L., and Vogt, M.: Biogeochemical extremes and compound events in the ocean, *Nature*, 600, 395-407, [10.1038/s41586-021-03981-7](https://doi.org/10.1038/s41586-021-03981-7), 2021.
- 820 Hausfather, Z., Marvel, K., Schmidt, G. A., Nielsen-Gammon, J. W., and Zelinka, M.: Climate simulations: recognize the 'hot model' problem, *Nature*, 605, 26-29, [10.1038/d41586-022-01192-2](https://doi.org/10.1038/d41586-022-01192-2), 2022.
- Hersbach, H., Bell, B., Berrisford, P., Hirahara, S., Horányi, A., Muñoz-Sabater, J., Nicolas, J., Peubey, C., Radu, R., Schepers, D., Simmons, A., Soci, C., Abdalla, S., Abellan, X., Balsamo, G., Bechtold, P., Biavati, G., Bidlot, J., Bonavita, M., De Chiara, G., Dahlgren, P., Dee, D., Diamantakis, M., Dragani, R., Flemming, J., Forbes, R., Fuentes, M., Geer, A., Haimberger, L., Healy, S., Hogan, R. J., Hólm, E., Janisková, M., Keeley, S., Laloyaux, P., Lopez, P., Lupu, C., Radnoti, G., de Rosnay, P., Rozum, I., Vamborg, F., Villaume, S., and Thépaut, J.-N.: The ERA5 global reanalysis, *Quarterly Journal of the Royal Meteorological Society*, 146, 1999-2049, <https://doi.org/10.1002/qj.3803>, 2020.
- 825 IPCC: Summary for Policymakers. In: *IPCC Special Report on the Ocean and Cryosphere in a Changing Climate 2019*.
- IPCC: *Climate Change 2021: The Physical Science Basis. Contribution of Working Group I to the Sixth Assessment Report of the Intergovernmental Panel on Climate Change*, Cambridge University Press, Cambridge, United Kingdom and New York, NY, USA, [10.1017/9781009157896](https://doi.org/10.1017/9781009157896), 2021.
- 830 Ito, T., Minobe, S., Long, M. C., and Deutsch, C.: Upper ocean O<sub>2</sub> trends: 1958–2015, *Geophysical Research Letters*, 44, 4214-4223, <https://doi.org/10.1002/2017GL073613>, 2017.



- Jacox, M. G., Alexander, M. A., Bograd, S. J., and Scott, J. D.: Thermal displacement by marine heatwaves, *Nature*, 584, 82-86, 10.1038/s41586-020-2534-z, 2020.
- 835 John, J. G., Blanton, C., McHugh, C., Radhakrishnan, A., Rand, K., Vahlenkamp, H., Wilson, C., Zadeh, N. T., Dunne, J. P., Dussin, R., Horowitz, L. W., Krasting, J. P., Lin, P., Malyshev, S., Naik, V., Ploshay, J., Shevliakova, E., Silvers, L., Stock, C., Winton, M., and Zeng, Y.: NOAA-GFDL GFDL-ESM4 model output prepared for CMIP6 ScenarioMIP ssp126, Earth System Grid Federation [dataset], 10.22033/ESGF/CMIP6.8684, 2018a.
- 840 John, J. G., Blanton, C., McHugh, C., Radhakrishnan, A., Rand, K., Vahlenkamp, H., Wilson, C., Zadeh, N. T., Dunne, J. P., Dussin, R., Horowitz, L. W., Krasting, J. P., Lin, P., Malyshev, S., Naik, V., Ploshay, J., Shevliakova, E., Silvers, L., Stock, C., Winton, M., and Zeng, Y.: NOAA-GFDL GFDL-ESM4 model output prepared for CMIP6 ScenarioMIP ssp585, 10.22033/ESGF/CMIP6.8706, 2018b.
- Jungclaus, J., Bittner, M., Wieners, K.-H., Wachsmann, F., Schupfner, M., Legutke, S., Giorgetta, M., Reick, C., Gayler, V., Haak, H., de Vrese, P., Raddatz, T., Esch, M., Mauritsen, T., von Storch, J.-S., Behrens, J., Brovkin, V., Claussen, M., Crueger, T., Fast, I., Fiedler, S., Hagemann, S., Hohenegger, C., Jahns, T., Kloster, S., Kinne, S., Lasslop, G., Kornblueh, L., Marotzke, J., Matei, D., Meraner, K., Mikolajewicz, U., Modali, K., Müller, W., Nabel, J., Notz, D., Peters-von Gehlen, K., Pincus, R., Pohlmann, H., Pongratz, J., Rast, S., Schmidt, H., Schnur, R., Schulzweida, U., Six, K., Stevens, B., Voigt, A., and Roeckner, E.: MPI-M MPI-ESM1.2-HR model output prepared for CMIP6 CMIP piControl, 10.22033/ESGF/CMIP6.6674, 2019a.
- 845 Jungclaus, J., Bittner, M., Wieners, K.-H., Wachsmann, F., Schupfner, M., Legutke, S., Giorgetta, M., Reick, C., Gayler, V., Haak, H., de Vrese, P., Raddatz, T., Esch, M., Mauritsen, T., von Storch, J.-S., Behrens, J., Brovkin, V., Claussen, M., Crueger, T., Fast, I., Fiedler, S., Hagemann, S., Hohenegger, C., Jahns, T., Kloster, S., Kinne, S., Lasslop, G., Kornblueh, L., Marotzke, J., Matei, D., Meraner, K., Mikolajewicz, U., Modali, K., Müller, W., Nabel, J., Notz, D., Peters-von Gehlen, K., Pincus, R., Pohlmann, H., Pongratz, J., Rast, S., Schmidt, H., Schnur, R., Schulzweida, U., Six, K., Stevens, B., Voigt, A., and Roeckner, E.: MPI-M MPI-ESM1.2-HR model output prepared for CMIP6 CMIP historical, 10.22033/ESGF/CMIP6.6594, 2019b.
- 850 Keeling, R. F., Körtzinger, A., and Gruber, N.: Ocean Deoxygenation in a Warming World, *Annual Review of Marine Science*, 2, 199-229, 10.1146/annurev.marine.010908.163855, 2010.
- Krasting, J. P., John, J. G., Blanton, C., McHugh, C., Nikonov, S., Radhakrishnan, A., Rand, K., Zadeh, N. T., Balaji, V., Durachta, J., Dupuis, C., Menzel, R., Robinson, T., Underwood, S., Vahlenkamp, H., Dunne, K. A., Gauthier, P. P. G., Ginoux, P., Griffies, S. M., Hallberg, R., Harrison, M., Hurlin, W., Malyshev, S., Naik, V., Paulot, F., Paynter, D. J., Ploshay, J., Reichl, B. G., Schwarzkopf, D. M., Seman, C. J., Silvers, L., Wyman, B., Zeng, Y., Adcroft, A., Dunne, J. P., Dussin, R., Guo, H., He, J., Held, I. M., Horowitz, L. W., Lin, P., Milly, P. C. D., Shevliakova, E., Stock, C., Winton, M., Wittenberg, A. T., Xie, Y., and Zhao, M.: NOAA-GFDL GFDL-ESM4 model output prepared for CMIP6 CMIP piControl, Earth System Grid Federation [dataset], 10.22033/ESGF/CMIP6.8669, 2018a.
- 865 Krasting, J. P., John, J. G., Blanton, C., McHugh, C., Nikonov, S., Radhakrishnan, A., Rand, K., Zadeh, N. T., Balaji, V., Durachta, J., Dupuis, C., Menzel, R., Robinson, T., Underwood, S., Vahlenkamp, H., Dunne, K. A., Gauthier, P. P. G., Ginoux, P., Griffies, S. M., Hallberg, R., Harrison, M., Hurlin, W., Malyshev, S., Naik, V., Paulot, F., Paynter, D. J., Ploshay, J., Reichl, B. G., Schwarzkopf, D. M., Seman, C. J., Silvers, L., Wyman, B., Zeng, Y., Adcroft, A., Dunne, J. P., Dussin, R., Guo, H., He, J., Held, I. M., Horowitz, L. W., Lin, P., Milly, P. C. D., Shevliakova, E., Stock, C., Winton, M., Wittenberg, A. T., Xie, Y., and Zhao, M.: NOAA-GFDL GFDL-ESM4 model output prepared for CMIP6 CMIP historical, 10.22033/ESGF/CMIP6.8597, 2018b.
- 870 Kwiatkowski, L., Torres, O., Bopp, L., Aumont, O., Chamberlain, M., Christian, J. R., Dunne, J. P., Gehlen, M., Ilyina, T., John, J. G., Lenton, A., Li, H., Lovenduski, N. S., Orr, J. C., Palmieri, J., Santana-Falcón, Y., Schwinger, J., Séférian, R., Stock, C. A., Tagliabue, A., Takano, Y., Tjiputra, J., Toyama, K., Tsujino, H., Watanabe, M., Yamamoto, A., Yool, A., and Ziehn, T.: Twenty-first century ocean warming, acidification, deoxygenation, and upper-ocean nutrient and primary production decline from CMIP6 model projections, *Biogeosciences*, 17, 3439-3470, 10.5194/bg-17-3439-2020, 2020.
- Levin, L. A. and Le Bris, N.: The deep ocean under climate change, *Science*, 350, 766-768, doi:10.1126/science.aad0126, 2015.
- Liao, M.-l., Li, G.-y., Wang, J., Marshall, D. J., Hui, T. Y., Ma, S.-y., Zhang, Y.-m., Helmuth, B., and Dong, Y.-w.: Physiological determinants of biogeography: The importance of metabolic depression to heat tolerance, *Global Change Biology*, 27, 2561-2579, <https://doi.org/10.1111/gcb.15578>, 2021.
- 880

- Locarnini, R. A., Mishonov, A. V., Baranova, O. K., Boyer, T. P., Zweng, M. M., Garcia, H. E., Reagan, J. R., Seidov, D., Weathers, K. W., Paver, C. R., and Smolyar, I. V.: World Ocean Atlas 2018, Volume 1: Temperature. A. Mishonov Technical Ed., NOAA Atlas NESDIS 81, 52 pp., 2019.
- 885 Long, M. C., Deutsch, C., and Ito, T.: Finding forced trends in oceanic oxygen, *Global Biogeochemical Cycles*, 30, 381-397, <https://doi.org/10.1002/2015GB005310>, 2016.
- Maraun, D.: Bias Correcting Climate Change Simulations - a Critical Review, *Current Climate Change Reports*, 2, 211-220, 10.1007/s40641-016-0050-x, 2016.
- 890 McCormick, L. R. and Levin, L. A.: Physiological and ecological implications of ocean deoxygenation for vision in marine organisms, *Philosophical Transactions of the Royal Society A: Mathematical, Physical and Engineering Sciences*, 375, 20160322, 10.1098/rsta.2016.0322, 2017.
- Meehl, G. A., Senior, C. A., Eyring, V., Flato, G., Lamarque, J.-F., Stouffer, R. J., Taylor, K. E., and Schlund, M.: Context for interpreting equilibrium climate sensitivity and transient climate response from the CMIP6 Earth system models, *Science Advances*, 6, 10.1126/sciadv.aba1981, 2020.
- 895 Meinshausen, M., Lewis, J., McGlade, C., Gütschow, J., Nicholls, Z., Burdon, R., Cozzi, L., and Hackmann, B.: Realization of Paris Agreement pledges may limit warming just below 2 °C, *Nature*, 604, 304-309, 10.1038/s41586-022-04553-z, 2022.
- Morice, C. P., Kennedy, J. J., Rayner, N. A., Winn, J. P., Hogan, E., Killick, R. E., Dunn, R. J. H., Osborn, T. J., Jones, P. D., and Simpson, I. R.: An Updated Assessment of Near-Surface Temperature Change From 1850: The HadCRUT5 Data Set, *Journal of Geophysical Research: Atmospheres*, 126, e2019JD032361, <https://doi.org/10.1029/2019JD032361>, 2021.
- 900 Oschlies, A.: A committed fourfold increase in ocean oxygen loss, *Nature Communications*, 12, 2307, 10.1038/s41467-021-22584-4, 2021.
- Oschlies, A., Brandt, P., Stramma, L., and Schmidtko, S.: Drivers and mechanisms of ocean deoxygenation, *Nature Geoscience*, 11, 467-473, 10.1038/s41561-018-0152-2, 2018.
- Oschlies, A., Duteil, O., Getzlaff, J., Koeve, W., Landolfi, A., and Schmidtko, S.: Patterns of deoxygenation: sensitivity to natural and anthropogenic drivers, *Philosophical Transactions of the Royal Society A: Mathematical, Physical and Engineering Sciences*, 375, 20160325, doi:10.1098/rsta.2016.0325, 2017.
- 905 Palumbi, S. R., Evans, T. G., Pespeni, M. H., and Somero, G. N.: Present and future adaptation of marine species assemblages: DNA-based insights into climate change from studies of physiology, genomics, and evolution, *Oceanography*, 32, 82-93, <https://doi.org/10.5670/oceanog.2019.314>, 2019.
- 910 Pauly, D.: Gasping fish and panting squids: oxygen, temperature and the growth of water-breathing animals. International Ecology Institute.,
- Pauly, D. and Cheung, W. W. L.: Sound physiological knowledge and principles in modeling shrinking of fishes under climate change, *Global Change Biology*, 24, e15-e26, <https://doi.org/10.1111/gcb.13831>, 2018.
- Penn, J. L., Deutsch, C., Payne, J. L., and Sperling, E. A.: Temperature-dependent hypoxia explains biogeography and severity of end-Permian marine mass extinction, *Science*, 362, eaat1327, doi:10.1126/science.aat1327, 2018.
- 915 Perry, A. L., Low, P. J., Ellis, J. R., and Reynolds, J. D.: Climate Change and Distribution Shifts in Marine Fishes, *Science*, 308, 1912-1915, doi:10.1126/science.1111322, 2005.
- Pinsky, M. L., Worm, B., Fogarty, M. J., Sarmiento, J. L., and Levin, S. A.: Marine Taxa Track Local Climate Velocities, *Science*, 341, 1239-1242, 10.1126/science.1239352, 2013.
- 920 Pitcher, G. C., Aguirre-Velarde, A., Breitburg, D., Cardich, J., Carstensen, J., Conley, D. J., Dewitte, B., Engel, A., Espinoza-Morriberón, D., Flores, G., Garçon, V., Graco, M., Grégoire, M., Gutiérrez, D., Hernandez-Ayon, J. M., Huang, H.-H. M., Isensee, K., Jacinto, M. E., Levin, L., Lorenzo, A., Machu, E., Merma, L., Montes, I., Swa, N., Paulmier, A., Roman, M., Rose, K., Hood, R., Rabalais, N. N., Salvanes, A. G. V., Salvatteci, R., Sánchez, S., Sifeddine, A., Tall, A. W., Plas, A. K. v. d., Yasuhara, M., Zhang, J., and Zhu, Z. Y.: System controls of coastal and open ocean oxygen depletion, *Progress in Oceanography*, 197, 102613, <https://doi.org/10.1016/j.pocean.2021.102613>, 2021.
- 925 Poloczanska, E. S., Burrows, M. T., Brown, C. J., García Molinos, J., Halpern, B. S., Hoegh-Guldberg, O., Kappel, C. V., Moore, P. J., Richardson, A. J., Schoeman, D. S., and Sydeman, W. J.: Responses of Marine Organisms to Climate Change across Oceans, *Frontiers in Marine Science*, 3, 10.3389/fmars.2016.00062, 2016.
- Poloczanska, E. S., Brown, C. J., Sydeman, W. J., Kiessling, W., Schoeman, D. S., Moore, P. J., Brander, K., Bruno, J. F., 930 Buckley, L. B., Burrows, M. T., Duarte, C. M., Halpern, B. S., Holding, J., Kappel, C. V., O'Connor, M. I., Pandolfi, J. M.,

- Parmesan, C., Schwing, F., Thompson, S. A., and Richardson, A. J.: Global imprint of climate change on marine life, *Nature Climate Change*, 3, 919-925, 10.1038/nclimate1958, 2013.
- Pörtner, H. O.: Oxygen- and capacity-limitation of thermal tolerance: a matrix for integrating climate-related stressor effects in marine ecosystems, *Journal of Experimental Biology*, 213, 881-893, 10.1242/jeb.037523, 2010.
- 935 Pörtner, H. O. and Knust, R.: Climate Change Affects Marine Fishes Through the Oxygen Limitation of Thermal Tolerance, *Science*, 315, 95-97, doi:10.1126/science.1135471, 2007.
- Pörtner, H. O. and Peck, M. A.: TEMPERATURE | Effects of Climate Change, in: *Encyclopedia of Fish Physiology*, edited by: Farrell, A. P., Academic Press, San Diego, 1738-1745, <https://doi.org/10.1016/B978-0-12-374553-8.00197-0>, 2011.
- 940 Sampaio, E., Santos, C., Rosa, I. C., Ferreira, V., Pörtner, H.-O., Duarte, C. M., Levin, L. A., and Rosa, R.: Impacts of hypoxic events surpass those of future ocean warming and acidification, *Nature Ecology & Evolution*, 5, 311-321, 10.1038/s41559-020-01370-3, 2021.
- Sarmiento, J. L. and Gruber, N.: *Ocean Biogeochemical Dynamics*, Princeton University Press, 2006.
- Schmidtko, S., Stramma, L., and Visbeck, M.: Decline in global oceanic oxygen content during the past five decades, *Nature*, 542, 335-339, 10.1038/nature21399, 2017.
- 945 Schupfner, M., Wieners, K.-H., Wachsmann, F., Steger, C., Bittner, M., Jungclaus, J., Früh, B., Pankatz, K., Giorgetta, M., Reick, C., Legutke, S., Esch, M., Gayler, V., Haak, H., de Vrese, P., Raddatz, T., Mauritsen, T., von Storch, J.-S., Behrens, J., Brovkin, V., Claussen, M., Crueger, T., Fast, I., Fiedler, S., Hagemann, S., Hohenegger, C., Jahns, T., Kloster, S., Kinne, S., Lasslop, G., Kornbluh, L., Marotzke, J., Matei, D., Meraner, K., Mikolajewicz, U., Modali, K., Müller, W., Nabel, J., Notz, D., Peters, K., Pincus, R., Pohlmann, H., Pongratz, J., Rast, S., Schmidt, H., Schnur, R., Schulzweida, U., Six, K., Stevens, B.,
- 950 Voigt, A., and Roeckner, E.: DKRZ MPI-ESM1.2-HR model output prepared for CMIP6 ScenarioMIP ssp585, 10.22033/ESGF/CMIP6.4403, 2019a.
- Schupfner, M., Wieners, K.-H., Wachsmann, F., Steger, C., Bittner, M., Jungclaus, J., Früh, B., Pankatz, K., Giorgetta, M., Reick, C., Legutke, S., Esch, M., Gayler, V., Haak, H., de Vrese, P., Raddatz, T., Mauritsen, T., von Storch, J.-S., Behrens, J., Brovkin, V., Claussen, M., Crueger, T., Fast, I., Fiedler, S., Hagemann, S., Hohenegger, C., Jahns, T., Kloster, S., Kinne, S.,
- 955 Lasslop, G., Kornbluh, L., Marotzke, J., Matei, D., Meraner, K., Mikolajewicz, U., Modali, K., Müller, W., Nabel, J., Notz, D., Peters-von Gehlen, K., Pincus, R., Pohlmann, H., Pongratz, J., Rast, S., Schmidt, H., Schnur, R., Schulzweida, U., Six, K., Stevens, B., Voigt, A., and Roeckner, E.: DKRZ MPI-ESM1.2-HR model output prepared for CMIP6 ScenarioMIP ssp126, 10.22033/ESGF/CMIP6.4397, 2019b.
- Séférian, R.: CNRM-CERFACS CNRM-ESM2-1 model output prepared for CMIP6 CMIP historical, 10.22033/ESGF/CMIP6.4068, 2018a.
- Séférian, R.: CNRM-CERFACS CNRM-ESM2-1 model output prepared for CMIP6 CMIP piControl, Earth System Grid Federation [dataset], 10.22033/ESGF/CMIP6.4165, 2018b.
- Seibel, B. A.: Critical oxygen levels and metabolic suppression in oceanic oxygen minimum zones, *Journal of Experimental Biology*, 214, 326-336, 10.1242/jeb.049171, 2011.
- 965 Seibel, B. A. and Birk, M. A.: Unique thermal sensitivity imposes a cold-water energetic barrier for vertical migrators, *Nature Climate Change*, 12, 1052-1058, 10.1038/s41558-022-01491-6, 2022.
- Seibel, B. A., Andres, A., Birk, M. A., Burns, A. L., Shaw, C. T., Timpe, A. W., and Welsh, C. J.: Oxygen supply capacity breathes new life into critical oxygen partial pressure (Pcrit), *Journal of Experimental Biology*, 224, jeb242210, 10.1242/jeb.242210, 2021.
- 970 Sharp, J. D., Fassbender, A. J., Carter, B. R., Johnson, G. C., Schultz, C., and Dunne, J. P.: GOBAI-O2: temporally and spatially resolved fields of ocean interior dissolved oxygen over nearly two decades, *Earth Syst. Sci. Data Discuss.*, 2022, 1-46, 10.5194/essd-2022-308, 2022.
- Stramma, L., Schmidtko, S., Bograd, S. J., Ono, T., Ross, T., Sasano, D., and Whitney, F. A.: Trends and decadal oscillations of oxygen and nutrients at 50 to 300 m depth in the equatorial and North Pacific, *Biogeosciences*, 17, 813-831, 10.5194/bg-17-813-2020, 2020.
- 975 Swart, N. C., Cole, J. N. S., Kharin, V. V., Lazare, M., Scinocca, J. F., Gillett, N. P., Anstey, J., Arora, V., Christian, J. R., Jiao, Y., Lee, W. G., Majaess, F., Saenko, O. A., Seiler, C., Seinen, C., Shao, A., Solheim, L., von Salzen, K., Yang, D., Winter, B., and Sigmund, M.: CCCma CanESM5 model output prepared for CMIP6 CMIP historical, 10.22033/ESGF/CMIP6.3610, 2019a.

- 980 Swart, N. C., Cole, J. N. S., Kharin, V. V., Lazare, M., Scinocca, J. F., Gillett, N. P., Anstey, J., Arora, V., Christian, J. R., Jiao, Y., Lee, W. G., Majaess, F., Saenko, O. A., Seiler, C., Seinen, C., Shao, A., Solheim, L., von Salzen, K., Yang, D., Winter, B., and Sigmond, M.: CCCma CanESM5 model output prepared for CMIP6 ScenarioMIP ssp585, 10.22033/ESGF/CMIP6.3696, 2019b.
- Swart, N. C., Cole, J. N. S., Kharin, V. V., Lazare, M., Scinocca, J. F., Gillett, N. P., Anstey, J., Arora, V., Christian, J. R., Jiao, Y., Lee, W. G., Majaess, F., Saenko, O. A., Seiler, C., Seinen, C., Shao, A., Solheim, L., von Salzen, K., Yang, D., Winter, B., and Sigmond, M.: CCCma CanESM5 model output prepared for CMIP6 CMIP piControl, Earth System Grid Federation [dataset], 10.22033/ESGF/CMIP6.3673, 2019c.
- 985 Swart, N. C., Cole, J. N. S., Kharin, V. V., Lazare, M., Scinocca, J. F., Gillett, N. P., Anstey, J., Arora, V., Christian, J. R., Jiao, Y., Lee, W. G., Majaess, F., Saenko, O. A., Seiler, C., Seinen, C., Shao, A., Solheim, L., von Salzen, K., Yang, D., Winter, B., and Sigmond, M.: CCCma CanESM5 model output prepared for CMIP6 ScenarioMIP ssp126, Earth System Grid Federation [dataset], 10.22033/ESGF/CMIP6.3683, 2019d.
- 990 Tai, T. C., Calosi, P., Gurney-Smith, H. J., and Cheung, W. W. L.: Modelling ocean acidification effects with life stage-specific responses alters spatiotemporal patterns of catch and revenues of American lobster, *Homarus americanus*, *Scientific Reports*, 11, 23330, 10.1038/s41598-021-02253-8, 2021.
- 995 Tang, Y., Rumbold, S., Ellis, R., Kelley, D., Mulcahy, J., Sellar, A., Walton, J., and Jones, C.: MOHC UKESM1.0-LL model output prepared for CMIP6 CMIP piControl, Earth System Grid Federation [dataset], 10.22033/ESGF/CMIP6.6298, 2019a.
- Tang, Y., Rumbold, S., Ellis, R., Kelley, D., Mulcahy, J., Sellar, A., Walton, J., and Jones, C.: MOHC UKESM1.0-LL model output prepared for CMIP6 CMIP historical, 10.22033/ESGF/CMIP6.6113, 2019b.
- Taylor, C. D.: The effect of pressure upon the solubility of oxygen in water: Implications of the deviation from the ideal gas law upon measurements of fluorescence quenching, *Archives of Biochemistry and Biophysics*, 191, 375-384, [https://doi.org/10.1016/0003-9861\(78\)90101-7](https://doi.org/10.1016/0003-9861(78)90101-7), 1978.
- 1000 Tittensor, D. P., Novaglio, C., Harrison, C. S., Heneghan, R. F., Barrier, N., Bianchi, D., Bopp, L., Bryndum-Buchholz, A., Britten, G. L., Büchner, M., Cheung, W. W. L., Christensen, V., Coll, M., Dunne, J. P., Eddy, T. D., Everett, J. D., Fernandes-Salvador, J. A., Fulton, E. A., Galbraith, E. D., Gascuel, D., Guiet, J., John, J. G., Link, J. S., Lotze, H. K., Maury, O., Ortega-Cisneros, K., Palacios-Abrantes, J., Petrik, C. M., du Pontavice, H., Rault, J., Richardson, A. J., Shannon, L., Shin, Y.-J., Steenbeek, J., Stock, C. A., and Blanchard, J. L.: Next-generation ensemble projections reveal higher climate risks for marine ecosystems, *Nature Climate Change*, 11, 973-981, 10.1038/s41558-021-01173-9, 2021.
- 1005 Tokarska, K. B., Stolpe, M. B., Sippel, S., Fischer, E. M., Smith, C. J., Lehner, F., and Knutti, R.: Past warming trend constrains future warming in CMIP6 models, *Science Advances*, 6, eaaz9549, doi:10.1126/sciadv.aaz9549, 2020.
- 1010 Vaquer-Sunyer, R. and Duarte, C. M.: Thresholds of hypoxia for marine biodiversity, *Proceedings of the National Academy of Sciences*, 105, 15452-15457, 10.1073/pnas.0803833105, 2008.
- Verberk, W. C. E. P., Bilton, D. T., Calosi, P., and Spicer, J. I.: Oxygen supply in aquatic ectotherms: Partial pressure and solubility together explain biodiversity and size patterns, *Ecology*, 92, 1565-1572, <https://doi.org/10.1890/10-2369.1>, 2011.
- Voltaire, A.: CNRM-CERFACS CNRM-ESM2-1 model output prepared for CMIP6 ScenarioMIP ssp126, Earth System Grid Federation [dataset], 10.22033/ESGF/CMIP6.4186, 2019a.
- 1015 Voltaire, A.: CNRM-CERFACS CNRM-ESM2-1 model output prepared for CMIP6 ScenarioMIP ssp585, Earth System Grid Federation [dataset], 10.22033/ESGF/CMIP6.4226, 2019b.
- von Schuckmann, K., Cheng, L., Palmer, M. D., Hansen, J., Tassone, C., Aich, V., Adusumilli, S., Beltrami, H., Boyer, T., Cuesta-Valero, F. J., Desbruyères, D., Domingues, C., García-García, A., Gentile, P., Gilson, J., Gorfer, M., Haimberger, L., Ishii, M., Johnson, G. C., Killick, R., King, B. A., Kirchengast, G., Kolodziejczyk, N., Lyman, J., Marzeion, B., Mayer, M., Monier, M., Monselesan, D. P., Purkey, S., Roemmich, D., Schweiger, A., Seneviratne, S. I., Shepherd, A., Slater, D. A., Steiner, A. K., Straneo, F., Timmermans, M. L., and Wijffels, S. E.: Heat stored in the Earth system: where does the energy go?, *Earth Syst. Sci. Data*, 12, 2013-2041, 10.5194/essd-12-2013-2020, 2020.
- 1020 Weiss, R. F. and Price, B. A.: Nitrous oxide solubility in water and seawater, *Marine Chemistry*, 8, 347-359, [https://doi.org/10.1016/0304-4203\(80\)90024-9](https://doi.org/10.1016/0304-4203(80)90024-9), 1980.
- 1025 Whalen, M. A., Whippe, R. D. B., Stachowicz, J. J., York, P. H., Aiello, E., Alcoverro, T., Altieri, A. H., Benedetti-Cecchi, L., Bertolini, C., Bresch, M., Bulleri, F., Carnell, P. E., Cimon, S., Connolly, R. M., Cusson, M., Diskin, M. S., D'Souza, E., Flores, A. A. V., Fodrie, F. J., Galloway, A. W. E., Gaskins, L. C., Graham, O. J., Hanley, T. C., Henderson, C. J., Hereu, C. M., Hessing-Lewis, M., Hovel, K. A., Hughes, B. B., Hughes, A. R., Hultgren, K. M., Jänes, H., Janiak, D. S., Johnston, L.

- 1030 N., Jorgensen, P., Kelaher, B. P., Kruschel, C., Lanham, B. S., Lee, K.-S., Lefcheck, J. S., Lozano-Álvarez, E., Macreadie, P. I., Monteith, Z. L., O'Connor, N. E., Olds, A. D., O'Leary, J. K., Patrick, C. J., Pino, O., Poore, A. G. B., Rasheed, M. A., Raymond, W. W., Reiss, K., Rhoades, O. K., Robinson, M. T., Ross, P. G., Rossi, F., Schlacher, T. A., Seemann, J., Silliman, B. R., Smee, D. L., Thiel, M., Unsworth, R. K. F., van Tussenbroek, B. I., Vergés, A., Yeager, M. E., Yednock, B. K., Ziegler, S. L., and Duffy, J. E.: Climate drives the geography of marine consumption by changing predator communities, *Proceedings of the National Academy of Sciences*, 117, 28160-28166, doi:10.1073/pnas.2005255117, 2020.
- 1035 Zweng, M. M., Reagan, J. R., Seidov, D., Boyer, T. P., Locarnini, R. A., Garcia, H. E., Mishonov, A. V., Baranova, O. K., Weathers, K. W., Paver, C. R., and Smolyar, I. V.: *World Ocean Atlas 2018, Volume 2: Salinity*. A. Mishonov Technical Ed., NOAA Atlas NESDIS 82, 50 pp., 2019.

1040
